# Supplementary material for: Iron(ii)-catalyzed asymmetric intramolecular olefin aminochlorination using chloride ion
Source: Royal Society of Chemistry journal article supplement (doi:10.1039/c5sc00221d), 2015-01-01

## **Iron(II) Catalyzed Asymmetric Intramolecular Olefin Aminochlorination with Chloride Ion**

Cheng-Liang Zhu,<sup>a</sup> Jun-Shan Tian,<sup>a</sup> Zhen-Yuan Gu,<sup>a,b</sup> Guo-Wen Xing,<sup>b</sup> and Hao Xu\*<sup>a</sup>

<sup>a</sup>*Department of Chemistry, Georgia State University, Atlanta GA 30303, United States*

<sup>b</sup>*Department of Chemistry, Beijing Normal University, Beijing, 100875, China*

### **Supporting Material**

#### **A. General Information**

#### **B. Catalyst Discovery and Procedures for the Iron-Catalyzed Diastereoselective Olefin Aminochlorination Reaction**

##### **a. Synthesis of New Nitrogen-Based Ligands and Catalyst Discovery for the Iron-Catalyzed Diastereoselective Olefin Aminochlorination**

##### **b. Synthesis and Characterization of New Substrates**

##### **c. General Procedure for the Iron-Catalyzed Diastereoselective Olefin Aminochlorination and Product Characterization**

#### **C. Catalyst Discovery and Procedures for the Iron-Catalyzed Asymmetric Olefin Aminochlorination Reaction**

##### **a. Catalyst Discovery for the Iron-Catalyzed Asymmetric Olefin Aminochlorination**

##### **b. Synthesis and Characterization of New Substrates**

##### **c. General Procedure for the Iron-Catalyzed Asymmetric Olefin Aminochlorination and Product Characterization**

## **D. Mechanistic Investigation of the Iron-Catalyzed Asymmetric Olefin Aminochlorination**

## **E. References**

## **F. NMR Spectra**

## A. General Information

**General Procedures.** All reactions were performed in flame-dried round-bottom flasks and vials. Stainless steel syringes and cannula were used to transfer air- and moisture-sensitive liquids. Flash chromatography was performed using silica gel 60 (230-400 mesh) from Sigma–Aldrich.

**Materials.** Tetra-*n*-butylammonium chloride (TBAC) was purchased from Sigma–Aldrich. It was further purified through recrystallization in the diethyl ether/acetone mixture and stored in a glove box under N<sub>2</sub> atmosphere. Other reagents were purchased from Sigma–Aldrich, Fluka, EM Science, and Lancaster and used directly as received. All solvents were used after being freshly distilled.

**Instrumentation.** Proton nuclear magnetic resonance (<sup>1</sup>H NMR) spectra, carbon nuclear magnetic resonance (<sup>13</sup>C NMR) spectra were recorded on Bruker UltraShield-400 (400 MHz). Chemical shifts for protons are reported in parts per million downfield from tetramethylsilane and are referenced to the NMR solvent residual peak (CHCl<sub>3</sub>: δ 7.26). Chemical shifts for carbons are reported in parts per million downfield from tetramethylsilane and are referenced to the carbon resonances of the NMR solvent (CDCl<sub>3</sub>: δ 77.0). Data are represented as follows: chemical shift, multiplicity (br = broad signal, s = singlet, d = doublet, t = triplet, q = quartet, m = multiplet, dd = doublet of doublets, dt = doublet of triplets), coupling constants in Hertz (Hz), and integration. The mass spectroscopic data were obtained at the Georgia State University mass spectrometry facility using a Micromass Platform II single quadrupole instrument. Infrared (IR) spectra were obtained using a Perkin Elmer Spectrum 100 FT-IR spectrometer. Data are represented as follows: frequency of absorption (cm<sup>-1</sup>) and absorption strength (s = strong, m = medium, w = weak).

**Abbreviations.** EtOH–ethanol, EtOAc–ethyl acetate, THF–tetrahydrofuran, MeOH–methanol, Et<sub>2</sub>O–diethyl ether, CH<sub>2</sub>Cl<sub>2</sub>–dichloromethane, TEA–triethylamine, MS–molecular sieves, CDI–1,1'-carbonyldiimidazole, DCC–*N,N'*-dicyclohexylcarbodiimide, DCU–*N,N'*-dicyclohexylurea, TLC–thin layer chromatography, DMAP–4-dimethylaminopyridine, TBAC–tetra-*n*-butylammonium chloride, Bz–benzoyl.

## B. Catalyst Discovery and Procedures for the Iron-Catalyzed Diastereoselective Olefin Aminochlorination Reaction

### a. Synthesis of New Nitrogen-Based Ligands and Catalyst Discovery for the Iron-Catalyzed Diastereoselective Olefin Aminochlorination

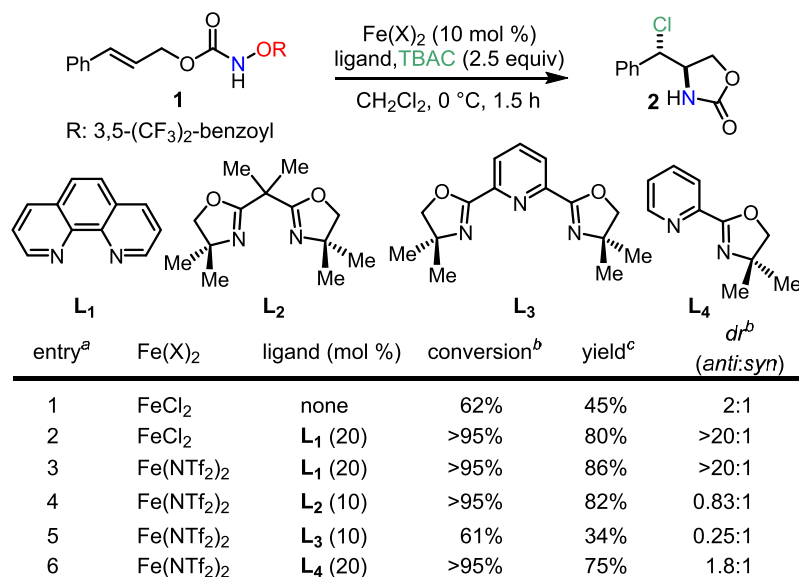

<sup>a</sup>Unless stated otherwise, the reactions were carried out under N<sub>2</sub> atmosphere. <sup>b</sup>Conversion and *dr* are determined by <sup>1</sup>H NMR. <sup>c</sup>Isolated yield. TBAC: tetra-*n*-butylammonium chloride.

**Table S1.** Catalyst discovery for the iron-catalyzed diastereoselective olefin aminochlorination reaction

L1 was purchased from Sigma–Aldrich and used directly without further purification. L2, L3, and L4 were synthesized according to literature procedures.<sup>1-3</sup>

**Procedure for Catalyst Discovery.** To a flame-dried sealable 2-dram vial (vial A) equipped with a magnetic stir bar were added an iron catalyst (0.02 mmol) and a ligand (0.02 or 0.04 mmol). After the vial was evacuated and backfilled with N<sub>2</sub> for three times, anhydrous CH<sub>2</sub>Cl<sub>2</sub> (1.0 mL) was added and the mixture was stirred at room temperature for 20 min. During this time, substrate **1** (0.2 mmol, 86 mg) and anhydrous TBAC (139 mg, 0.5 mmol) were dissolved in CH<sub>2</sub>Cl<sub>2</sub> (4.0 mL) in a second flame-dried 3-dram vial (vial B) with a magnetic stir bar under N<sub>2</sub> atmosphere. Both vials were degassed by brief evacuation and back filling with N<sub>2</sub> twice. The vial B was cooled down to 0 °C, and the solution in vial A was added to vial B drop wise via a syringe. The resulting solution was stirred at the same temperature until **1** was fully consumed



monitored by TLC. The reaction was quenched with 1 mL saturated NaHCO<sub>3</sub> solution and extracted with CH<sub>2</sub>Cl<sub>2</sub> (1.5 mL × 3). The combined organic phase was concentrated and the residue was purified through a gradient silica gel flash column chromatography (hexanes/acetone: from 15:1 to 4:1) to afford the aminochlorination product **2** as a white solid. The *dr* was determined by <sup>1</sup>H NMR analysis of the crude reaction mixture.

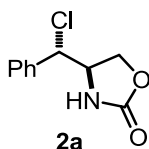

**4-(Chloro(phenyl)methyl)oxazolidin-2-one (2a)**: by following the general procedure under the condition described in entry 3, **2a** was obtained as a white solid (36 mg, 86% yield, *dr* >20:1, m.p. 90–93 °C). <sup>1</sup>H NMR (400 MHz, CDCl<sub>3</sub>): δ 7.44–7.38 (m, 5H), 4.93 (s, 1H), 4.72 (d, *J* = 9.1 Hz, 1H), 4.62 (dd, *J* = 9.3, 8.1 Hz, 1H), 4.48 (dd, *J* = 9.4, 4.8 Hz, 1H), 4.27 (td, *J* = 8.6, 4.8 Hz, 1H); <sup>13</sup>C NMR (100 MHz, CDCl<sub>3</sub>): δ 158.1, 136.6, 129.7, 129.3, 127.7, 68.6, 63.4, 58.3; IR  $\nu_{\max}$  (neat)/cm<sup>-1</sup>: 3237 (m), 3139 (w), 2918 (w), 2853 (w), 1736 (s), 1715 (s), 1480 (m), 1402(m), 1237 (s), 1034 (s), 1012 (s), 931 (m), 768 (m); HRMS (ESI, *m/z*): calcd for C<sub>10</sub>H<sub>11</sub>NO<sub>2</sub>Cl<sup>+</sup> (*M* + H<sup>+</sup>), 212.0478, found 212.0485.

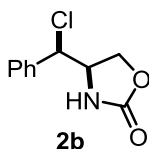

**4-(Chloro(phenyl)methyl)oxazolidin-2-one (2b)**: by following the general procedure under the condition described in entry 4, **2a** and **2b** were obtained as a mixture (34 mg, 82% yield, *dr*: 0.83:1, m.p. 91–99 °C). **2b** is characterized as following: <sup>1</sup>H NMR (400 MHz, CDCl<sub>3</sub>): δ 7.47–7.32 (m, 5H), 6.21 (s, 1H), 4.80 (d, *J* = 8.7 Hz, 1H), 4.29 (td, *J* = 8.4, 4.7 Hz, 1H), 4.20 (dd, *J* = 8.5, 1H), 4.00 (dd, *J* = 9.3, 4.8 Hz, 1H); <sup>13</sup>C NMR (100 MHz, CDCl<sub>3</sub>): δ 158.1, 136.6, 129.7, 129.3, 127.7, 68.6, 63.4, 58.3; IR  $\nu_{\max}$  (neat)/cm<sup>-1</sup>: 3230 (m), 3131 (w), 2915 (w), 2853 (w), 1734 (s), 1713 (s), 1475 (m), 1409(m), 1234 (s), 1034 (s), 1012 (s), 930 (m), 770 (m); HRMS (ESI, *m/z*): calcd for C<sub>10</sub>H<sub>11</sub>NO<sub>2</sub>Cl<sup>+</sup> (*M* + H<sup>+</sup>), 212.0478, found 212.0485.

**Relative Stereochemistry Determination.** The relative stereochemistry of **2** was determined by comparison of the NMR spectra of **2a** and **2b** with literature precedents, in which **2a** and **2b** were both characterized.<sup>4</sup>

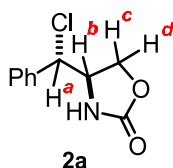

| compound            | <b>2a</b>                                                                                                                                                                                                                                                                                                              | <b>2-anti</b> (literature data) <sup>4</sup>                                                                                                                                                                                                                                                                                  |
|---------------------|------------------------------------------------------------------------------------------------------------------------------------------------------------------------------------------------------------------------------------------------------------------------------------------------------------------------|-------------------------------------------------------------------------------------------------------------------------------------------------------------------------------------------------------------------------------------------------------------------------------------------------------------------------------|
| <sup>1</sup> H NMR  | <sup>1</sup> H NMR (400 MHz, CDCl <sub>3</sub> ): δ 7.44–7.38 (m, 5H), 4.93 (s, 1H), 4.72 (d, <i>J</i> = 9.1 Hz, <b>H<sub>a</sub></b> ), 4.62 (dd, <i>J</i> = 9.3, 8.1 Hz, <b>H<sub>c</sub></b> ), 4.48 (dd, <i>J</i> = 9.4, 4.8 Hz, <b>H<sub>d</sub></b> ), 4.27 (td, <i>J</i> = 8.6, 4.8 Hz, <b>H<sub>b</sub></b> ). | <sup>1</sup> H NMR (200 MHz, CDCl <sub>3</sub> ): δ 7.70–7.40 (m, 5H), 5.90 (s, 1H), 4.89 (d, <i>J</i> = 8.5 Hz, <b>H<sub>a</sub></b> ), 4.66 (dd, <i>J</i> = 8.5 Hz, <b>H<sub>c</sub></b> ), 4.58 (dd, <i>J</i> = 8.5, <i>J</i> = 5.0 Hz, <b>H<sub>d</sub></b> ), 4.40 (ddd, <i>J</i> = 8.5, 5.0 Hz, <b>H<sub>b</sub></b> ). |
| <sup>13</sup> C NMR | <sup>13</sup> C NMR (100 MHz, CDCl <sub>3</sub> ): δ 158.1, 136.6, 129.7, 129.3, 127.7, 68.6, 63.4, 58.3.                                                                                                                                                                                                              | <sup>13</sup> C NMR (50 MHz, CDCl <sub>3</sub> ): δ 158.7 (s), 136.4 (s), 129.4 (d), 129.1 (d), 127.6 (d), 68.1 (t), 63.5 (d), 58.2 (d).                                                                                                                                                                                      |

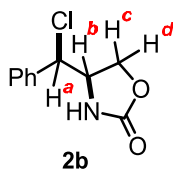

| compound            | <b>2b</b>                                                                                                                                                                                                                                                                                                         | <b>2-syn</b> (literature data) <sup>4</sup>                                                                                                                                                                                                                                                                             |
|---------------------|-------------------------------------------------------------------------------------------------------------------------------------------------------------------------------------------------------------------------------------------------------------------------------------------------------------------|-------------------------------------------------------------------------------------------------------------------------------------------------------------------------------------------------------------------------------------------------------------------------------------------------------------------------|
| <sup>1</sup> H NMR  | <sup>1</sup> H NMR (400 MHz, CDCl <sub>3</sub> ): δ 7.47–7.32 (m, 5H), 6.21 (s, 1H), 4.80 (d, <i>J</i> = 8.7 Hz, <b>H<sub>a</sub></b> ), 4.29 (td, <i>J</i> = 8.4, 4.7 Hz, <b>H<sub>b</sub></b> ), 4.20 (dd, <i>J</i> = 8.5 Hz, <b>H<sub>c</sub></b> ), 4.00 (dd, <i>J</i> = 9.3, 4.8 Hz, <b>H<sub>d</sub></b> ). | <sup>1</sup> H NMR (200 MHz, CDCl <sub>3</sub> ): δ 7.50–7.25 (m, 5H), 5.95 (s, 1H), 4.82 (d, <i>J</i> = 8.5 Hz, <b>H<sub>a</sub></b> ), 4.34 (ddd, <i>J</i> = 8.5, 8.5, 4.7 Hz, <b>H<sub>b</sub></b> ), 4.24 (dd, <i>J</i> = 8.5 Hz, <b>H<sub>c</sub></b> ), 4.03 (dd, <i>J</i> = 8.5, 4.7 Hz, <b>H<sub>d</sub></b> ). |
| <sup>13</sup> C NMR | <sup>13</sup> C NMR (100 MHz, CDCl <sub>3</sub> ): δ 158.4, 135.9, 129.6, 129.2, 127.6, 66.9, 65.0, 58.2.                                                                                                                                                                                                         | <sup>13</sup> C NMR (50 MHz, CDCl <sub>3</sub> ): δ 158.9 (s), 135.9 (s), 129.4 (d), 129.0 (d), 127.5 (d), 66.9 (t), 64.8 (d), 58.6 (d).                                                                                                                                                                                |

**Summary:** the diagnostic  $^1\text{H}$  NMR signal to differentiate **2a** (*anti*-addition product) and **2b** (*syn*-addition product) is the  $\delta$   $\text{H}_d$  in both compounds:  $\delta$   $\text{H}_d$  in **2a** is 4.49 ppm and  $\delta$   $\text{H}_d$  in **2b** is 4.00 ppm. The chemical shift difference between two diastereomeric compounds is consistent with a broad range of products. This stereochemistry assignment is further corroborated through X-ray crystallographic analysis of **S37**, a structural analogue of **2a**.

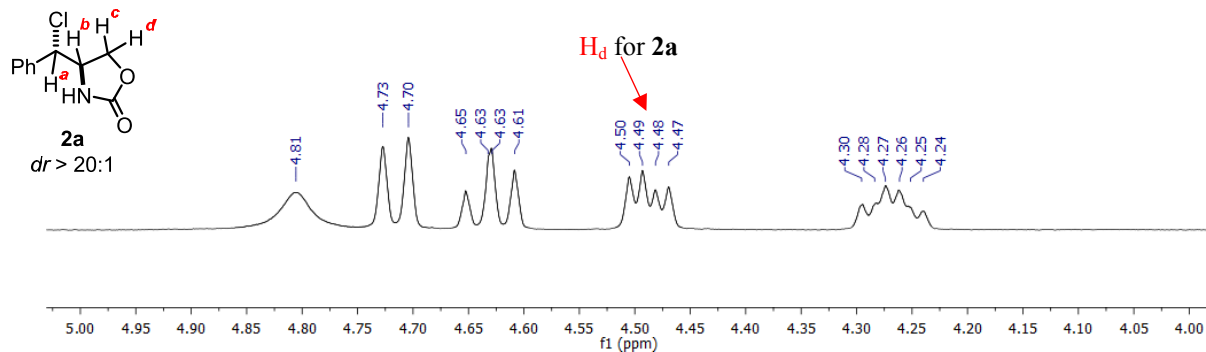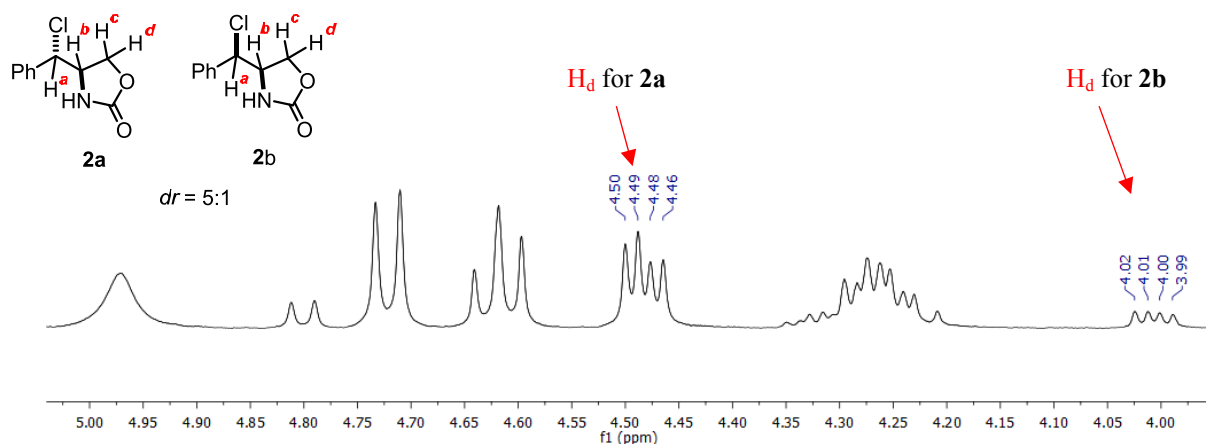

## b. Synthesis and Characterization of New Substrates (S1–S8)

The substrates were synthesized by following a known procedure.<sup>2</sup> All new compounds have been characterized.

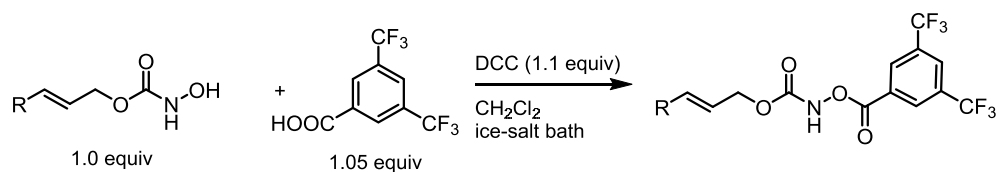

**General procedures.** To a flame-dried round bottom flask equipped with a magnetic stir bar were added hydroxyl carbamate (5.0 mmol, 1.0 equiv), 3,5-bis(trifluoromethyl)benzoic acid (5.25 mmol, 1.05 equiv) and anhydrous CH<sub>2</sub>Cl<sub>2</sub> (50 mL). After stirring at -15 °C for 5 min, DCC (5.5 mmol, 1.1 equiv) in CH<sub>2</sub>Cl<sub>2</sub> (10 mL) was added drop wise. The reaction was then stirred at the same temperature until all the hydroxyl carbamate was fully consumed monitored by TLC. The reaction solution was quenched by adding acetic acid (0.1 mL) and the mixture was filtered to remove *N, N'*-dicyclohexylurea (DCU). The filtrate was concentrated under reduced pressure, and then diethyl ether (20 mL) was added. The mixture was cooled in a refrigerator for 1 h and filtered again to remove additional DCU. The filtrate was concentrated *in vacuo* and the residue was purified through a gradient silica gel flash column chromatography (hexanes/EtOAc: from 20:1 to 7:1) or recrystallized directly with a hexanes/EtOAc mixture to afford the desired products (65–91% yield).

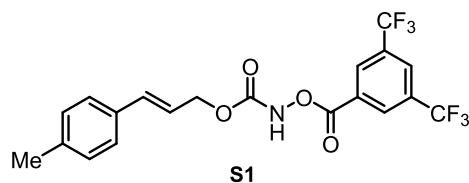

**(*E*)-3-(*p*-tolyl)allyl ((3,5-bis(trifluoromethyl)benzoyl)oxy)carbamate (S1)** : by following the general procedure, **S1** was obtained as a white solid (82% yield, m.p. 98–100 °C). <sup>1</sup>H NMR (400 MHz, CDCl<sub>3</sub>): δ 8.55 (s, 2H), 8.43 (s, 1H), 8.14 (s, 1H), 7.29 (d, *J* = 8.1 Hz, 2H), 7.13 (d, *J* = 7.9 Hz, 2H), 6.68 (d, *J* = 15.8 Hz, 1H), 6.24 (dt, *J* = 15.8, 6.7 Hz, 1H), 4.89 (dd, *J* = 6.7, 0.9 Hz, 2H), 2.34 (s, 3H); <sup>13</sup>C NMR (100 MHz, CDCl<sub>3</sub>): δ 163.4, 156.1, 138.4, 135.7, 133.0, 132.7 (q, *J* = 34.4 Hz), 130.2, 129.4, 129.0, 127.8–127.4(m), 126.7, 122.6 (q, *J* = 272.1 Hz), 120.7, 67.9, 21.2; IR  $\nu_{\max}$  (neat)/cm<sup>-1</sup>: 3255 (m), 3085 (m), 2968 (m), 1764 (m), 1268 (s), 1134 (s), 680 (s); HRMS (ESI, m/z): calcd for C<sub>20</sub>H<sub>14</sub>NO<sub>4</sub>F<sub>6</sub><sup>-</sup> (M - H<sup>+</sup>), 446.0921, found 446.0924.

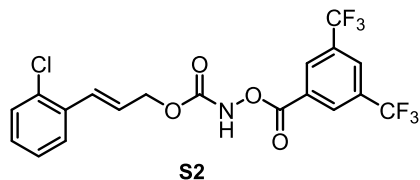

**(E)-3-(2-Chlorophenyl)allyl (3,5-bis(trifluoromethyl)benzoyl)oxycarbamate (S2):** by following the general procedure, **S2** was obtained as a white solid (77% yield, m.p. 85–87 °C). <sup>1</sup>H NMR (400 MHz, CDCl<sub>3</sub>): δ 8.55 (s, 2H), 8.49 (s, 1H), 8.15 (s, 1H), 7.54–7.51 (m, 1H), 7.36–7.34 (m, 1H), 7.25–7.19 (m, 2H), 7.09 (d, *J* = 15.9 Hz, 1H), 6.28 (dt, *J* = 15.8, 6.3 Hz, 1H), 4.93 (d, *J* = 6.3 Hz, 2H); <sup>13</sup>C NMR (100 MHz, CDCl<sub>3</sub>): δ 163.4, 156.0, 134.0, 133.3, 132.7 (d, *J* = 34.4 Hz), 131.2, 130.0, 129.8, 129.3, 128.9, 127.6, 127.0, 126.9, 124.6, 122.6 (q, *J* = 273.0 Hz), 67.4; IR  $\nu_{\max}$  (neat)/cm<sup>-1</sup>: 3265 (m), 3098 (w), 2940 (w), 1756 (m), 1280 (s), 1137 (s), 681 (s); HRMS (ESI, m/z): calcd for C<sub>19</sub>H<sub>11</sub>NO<sub>4</sub>F<sub>6</sub>Cl<sup>-</sup> (M - H<sup>+</sup>), 466.0281, found 466.0284.

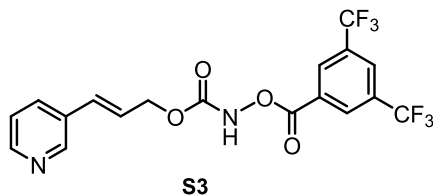

**(E)-3-(pyridin-3-yl)allyl (3,5-bis(trifluoromethyl)benzoyl)oxycarbamate (S3):** by following the general procedure (purification through a gradient silica gel flash column chromatography with hexanes/Acetone: from 7:1 to 2.5:1), **S3** was obtained as a white solid (65% yield, m.p. 118–120 °C). <sup>1</sup>H NMR (400 MHz, CDCl<sub>3</sub>): δ 9.16 (s, 1H), 8.63 (s, 1H), 8.56 (s, 2H), 8.51 (d, *J* = 4.5 Hz, 1H), 8.15 (s, 1H), 7.72 (d, *J* = 7.9 Hz, 1H), 7.28 (dd, *J* = 4.8, 7.9 Hz, 1H), 6.70 (d, *J* = 16.0 Hz, 1H), 6.38 (dt, *J* = 16.0, 6.2 Hz, 1H), 4.92 (d, *J* = 6.1 Hz, 2H); <sup>13</sup>C NMR (100 MHz, CDCl<sub>3</sub>): δ 163.4, 156.0, 149.2, 148.3, 133.3, 132.7 (q, *J* = 34.3 Hz), 131.7, 131.2, 130.1, 129.0, 127.6, 124.6, 123.6, 122.6 (q, *J* = 273.2 Hz), 66.9; IR  $\nu_{\max}$  (neat)/cm<sup>-1</sup>: 3093 (w), 2931 (w), 1750 (s), 1380 (m), 1277 (s), 1216 (s), 1137 (s), 706 (m), 682 (m); HRMS (ESI, m/z): calcd for C<sub>18</sub>H<sub>11</sub>NO<sub>4</sub>F<sub>6</sub><sup>-</sup> (M - H<sup>+</sup>), 433.0634, found 433.0623.

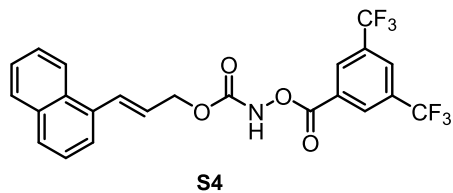

**(E)-3-(naphthalen-1-yl)allyl ((3,5-bis(trifluoromethyl)benzoyl)oxy)carbamate (S4):** by following the general procedure, **S4** was obtained as a white solid (91% yield, m.p. 115–117 °C). <sup>1</sup>H NMR (400 MHz, CDCl<sub>3</sub>): δ 8.55 (s, 2H), 8.46 (s, 1H), 8.15 (s, 1H), 8.08 (d, *J* = 7.8 Hz, 1H), 7.86 (d, *J* = 8.1 Hz, 1H), 7.81 (d, *J* = 8.1 Hz, 1H), 7.60 (d, *J* = 7.0 Hz, 1H), 7.56–7.42 (m, 4H), 6.34 (dt, *J* = 13.3, 6.4 Hz, 1H), 5.02 (d, *J* = 6.4 Hz, 2H); <sup>13</sup>C NMR (100 MHz, CDCl<sub>3</sub>) δ 163.4, 156.1, 133.6, 133.6, 132.8, 132.7 (q, *J* = 34.3 Hz), 131.1, 130.1 (q, *J* = 4.2 Hz), 129.0, 128.7, 128.6, 127.7, 126.3, 125.9, 125.5, 125.0, 124.2, 123.6, 122.6 (q, *J* = 271.0 Hz), 67.8; IR  $\nu_{\max}$  (neat)/cm<sup>-1</sup>: 3674 (m), 2988 (m), 2901 (m), 1765 (m), 1755 (m), 1381 (m), 1278 (s), 1210 (m), 1141 (s), 904 (s), 710 (s); HRMS (ESI, *m/z*): calcd for C<sub>23</sub>H<sub>15</sub>O<sub>4</sub>NF<sub>6</sub>ClNa<sup>+</sup> (M + Na<sup>+</sup>), 506.0911, found 506.0910.

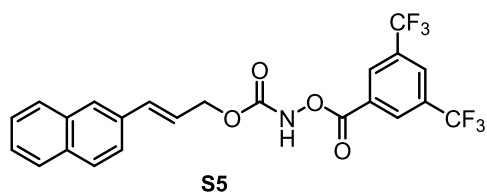

**(E)-3-(naphthalen-2-yl)allyl ((3,5-bis(trifluoromethyl)benzoyl)oxy)carbamate (S5):** by following the general procedure, **S5** was obtained as a white solid (88% yield, m.p. 116–118 °C). <sup>1</sup>H NMR (400 MHz, CDCl<sub>3</sub>): δ 8.56 (s, 2H), 8.39 (s, 1H), 8.15 (s, 1H), 7.85 – 7.78 (m, 3H), 7.76 (d, *J* = 1.6 Hz, 1H), 7.60 (dd, *J* = 8.6, 1.8 Hz, 1H), 7.52–7.44 (m, 2H), 6.88 (d, *J* = 15.9 Hz, 1H), 6.43 (dt, *J* = 15.9, 6.6 Hz, 1H), 4.96 (dd, *J* = 6.6, 1.3 Hz, 2H); <sup>13</sup>C NMR (100 MHz, CDCl<sub>3</sub>): δ 163.4, 156.0, 135.7, 133.4, 133.3, 133.2, 132.7 (q, *J* = 34.4 Hz), 130.1 (q, *J* = 3.2 Hz), 129.0, 128.4, 128.1, 127.7, 127.2, 126.4, 126.3, 123.4, 122.6 (q, *J* = 272.2 Hz), 122.1, 67.8; IR  $\nu_{\max}$  (neat)/cm<sup>-1</sup>: 3688 (m), 2988 (s), 2901 (s), 1776 (m), 1755(m), 1380 (m), 1278 (s), 1213 (s), 1110 (m), 1076 (s), 1051 (s), 681 (m); HRMS (ESI, *m/z*): calcd for C<sub>23</sub>H<sub>15</sub>O<sub>4</sub>NF<sub>6</sub>ClNa<sup>+</sup> (M + Na<sup>+</sup>), 506.0911, found 506.0914.

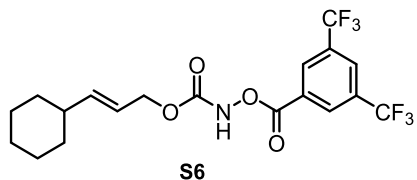

**(E)-3-Cyclohexylallyl (3,5-bis(trifluoromethyl)benzoyl)oxycarbamate (S6):** by following the general procedure, **S6** was obtained as a white solid (83% yield, m.p. 60–62 °C). <sup>1</sup>H NMR (400 MHz, CDCl<sub>3</sub>): δ 8.54 (s, 2H), 8.41 (s, 1H), 8.14 (s, 1H), 5.78 (dd, *J* = 15.5, 6.6 Hz, 1H), 5.60–5.46 (m, 1H), 4.67 (d, *J* = 6.6 Hz, 2H), 2.08–1.91 (m, 1H), 1.81–1.55 (m, 4H), 1.37–0.98 (m, 6H); <sup>13</sup>C NMR (100 MHz, CDCl<sub>3</sub>): δ 163.4, 156.1, 143.8, 132.7 (q, *J* = 34.3 Hz), 130.0, 129.0, 127.5, 122.6 (q, *J* = 273.0 Hz), 120.2, 68.2, 40.3, 32.4, 26.0, 25.9; IR  $\nu_{\max}$  (neat)/cm<sup>-1</sup>: 3070 (w), 2971 (w), 1720 (m), 1282 (m), 1265 (s), 1211 (m), 1145 (m), 896 (m), 728 (s), 703 (s); HRMS (ESI, *m/z*): calcd for C<sub>19</sub>H<sub>18</sub>NO<sub>4</sub>F<sub>6</sub><sup>-</sup> (M - H<sup>+</sup>), 438.1140, found 438.1126.

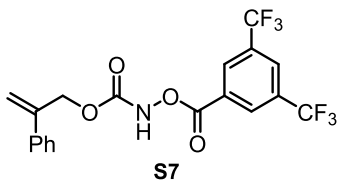

**2-Phenylallyl (3,5-bis(trifluoromethyl)benzoyl)oxycarbamate (S7):** by following the general procedure, **S7** was obtained as a white solid (75% yield, m.p. 70–72 °C). <sup>1</sup>H NMR (400 MHz, CDCl<sub>3</sub>): δ 8.47 (s, 2H), 8.16 (s, 1H), 7.40 (d, *J* = 7.2 Hz, 2H), 7.32–7.25 (m, 3H), 5.59 (s, 1H), 5.43 (s, 1H), 5.16 (s, 2H); <sup>13</sup>C NMR (100 MHz, CDCl<sub>3</sub>): δ 163.3, 156.1, 141.6, 137.3, 132.5 (q, *J* = 34.4 Hz), 130.0, 128.9, 128.4, 128.1, 127.5, 125.9, 122.6 (q, *J* = 273.1 Hz), 116.3, 68.2; IR  $\nu_{\max}$  (neat)/cm<sup>-1</sup>: 3320 (m), 3060 (w), 1758 (m), 1281 (s), 1185 (s), 737 (s); HRMS (ESI, *m/z*): calcd for C<sub>19</sub>H<sub>12</sub>NO<sub>4</sub>F<sub>6</sub><sup>-</sup> (M - H<sup>+</sup>), 432.0671, found 432.0660.

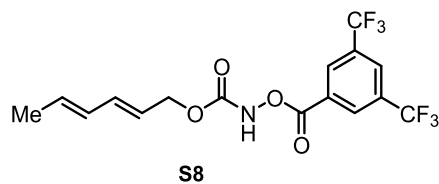

**(2E,4E)-hexa-2,4-dien-1-yl (3,5-bis(trifluoromethyl)benzoyl)oxycarbamate (S8):** by following the general procedure, **S8** was obtained as a white solid (90% yield, m.p. 84–86 °C).

$^1\text{H}$  NMR (400 MHz,  $\text{CDCl}_3$ ):  $\delta$  8.54 (s, 2H), 8.38 (s, 1H), 8.14 (s, 1H), 6.30 (dd,  $J = 15.1, 10.6$  Hz, 1H), 6.12–6.00 (m, 1H), , 5.78 (dq,  $J = 13.7, 6.5$  Hz, 1H), 5.63 (dt,  $J = 14.4, 6.8$  Hz, 1H), 4.73 (d,  $J = 6.7$  Hz, 2H), 1.77 (d,  $J = 6.6$  Hz, 3H);  $^{13}\text{C}$  NMR (100 MHz,  $\text{CDCl}_3$ ):  $\delta$  163.4, 156.0, 136.3, 132.6 (q,  $J = 34.3$  Hz), 132.4, 127.6, 122.5 (q,  $J = 271.3$  Hz), 122.2, 67.7, 18.2; IR  $\nu_{\text{max}}$  (neat)/ $\text{cm}^{-1}$ : 3261 (w), 3022 (w), 2918 (w), 2856 (w), 1753 (m), 1281 (s); HRMS (ESI,  $m/z$ ): calcd for  $\text{C}_{16}\text{H}_{12}\text{NO}_4\text{F}_6^-$  ( $\text{M} - \text{H}^+$ ), 396.0671, found 396.0677.

### c. General Procedure for the Iron-Catalyzed Diastereoselective Olefin Aminochlorination and Product Characterization

**General procedure.** To a flame-dried sealable 2-dram vial (vial **A**) equipped with a magnetic stir bar were added  $\text{Fe}(\text{NTf}_2)_2$  (12.3 mg, 0.02 mmol, 10 mol %) and 1,10-phenanthroline (7.2 mg, 0.04 mmol, 20 mol %). After the vial was evacuated and backfilled with  $\text{N}_2$  for three times, anhydrous  $\text{CH}_2\text{Cl}_2$  (1.0 mL) was added and the mixture was stirred at room temperature for 20 min. During this time, the substrate (0.2 mmol) and anhydrous TBAC (139 mg, 0.5 mmol) were dissolved in  $\text{CH}_2\text{Cl}_2$  (4.0 mL) in a second flame-dried 3-dram vial (vial **B**) with a magnetic stir bar under  $\text{N}_2$  atmosphere. Both vials were degassed by brief evacuation and back filling with  $\text{N}_2$  twice. The vial **B** was cooled down to  $0^\circ\text{C}$ , and the solution in vial **A** was added to vial **B** drop wise via a syringe. The resulting solution was stirred at the same temperature until all the starting material was fully consumed monitored by TLC. The reaction was quenched by 2 mL saturated  $\text{NaHCO}_3$  solution. After being extracted with  $\text{CH}_2\text{Cl}_2$  (1.5 mL  $\times$  3), the combined organic phase was concentrated and the residue was purified through a gradient silica gel flash column chromatography (hexanes/acetone: from 15:1 to 4:1) to afford the aminochlorination product. The  $dr$  was determined by  $^1\text{H}$  NMR analysis of the crude reaction mixture.

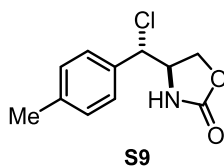

**4-(Chloro(*p*-tolyl)methyl)oxazolidin-2-one (S9)** : by following the general procedure and carrying out reaction at  $-15^\circ\text{C}$ , **S9** was obtained as a white solid (39 mg, 86% yield,  $dr >20:1$ , m.p.  $126\text{--}129^\circ\text{C}$ ).  $^1\text{H}$  NMR (400 MHz,  $\text{CDCl}_3$ ):  $\delta$  7.27 (d,  $J = 8.0$  Hz, 2H), 7.22 (d,  $J = 8.1$  Hz,



2H), 4.84 (s, 1H), 4.69 (d,  $J = 9.2$  Hz, 1H), 4.62 (dd,  $J = 9.3, 8.3$  Hz, 1H), 4.47 (dd,  $J = 9.4, 4.7$  Hz, 1H), 4.25 (td,  $J = 8.5, 5.0$  Hz, 1H), 2.37 (s, 3H);  $^{13}\text{C}$  NMR (100 MHz,  $\text{CDCl}_3$ ):  $\delta$  158.0, 139.9, 133.6, 130.0, 127.6, 68.7, 63.4, 58.3, 21.2; IR  $\nu_{\text{max}}$  (neat)/ $\text{cm}^{-1}$ : 3272 (m), 3154 (w), 3037 (w), 2918 (w), 2340 (w), 1749 (s), 1404 (m), 1280 (m), 1239 (m), 1026 (m), 766 (m); HRMS (ESI,  $m/z$ ): calcd for  $\text{C}_{11}\text{H}_{13}\text{NO}_2\text{Cl}^+$  ( $\text{M} + \text{H}^+$ ), 226.0635, found 226.0640.

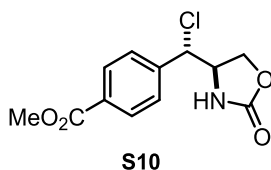

**Methyl 4-(chloro(2-oxooxazolidin-4-yl)methyl)benzoate (S10)**: by following the general procedure, **S10** and its diastereomer were obtained as a white solid (38 mg, 70% yield, *dr*: 7:1, m.p. 136–139 °C). **S10**:  $^1\text{H}$  NMR (400 MHz,  $\text{CDCl}_3$ ):  $\delta$  8.06 (d,  $J = 8.4$  Hz, 2H), 7.47 (d,  $J = 8.3$  Hz, 2H), 5.58 (s, 1H), 4.79 (d,  $J = 8.6$  Hz, 1H), 4.58 (dd,  $J = 9.5, 8.3$  Hz, 1H), 4.45 (dd,  $J = 9.5, 4.7$  Hz, 1H), 4.27 (td,  $J = 8.4, 4.7$  Hz, 1H), 3.92 (s, 3H);  $^{13}\text{C}$  NMR (100 MHz,  $\text{CDCl}_3$ ):  $\delta$  166.2, 158.4, 141.2, 131.3, 130.4, 127.8, 68.2, 62.8, 58.2, 52.4; its *syn*-diastereomer:  $^1\text{H}$  NMR (400 MHz,  $\text{CDCl}_3$ ):  $\delta$  8.08 (d,  $J = 8.4$  Hz, 2H), 7.46 (d,  $J = 8.3$  Hz, 2H), 5.62 (s, 1H), 4.85 (d,  $J = 8.3$  Hz, 1H), 4.33 (td,  $J = 8.4, 5.2$  Hz, 1H), 4.27 (dd,  $J = 9.1$  Hz, 1H), 4.04 (dd,  $J = 9.2, 4.6$  Hz, 1H), 3.96 (s, 3H);  $^{13}\text{C}$  NMR (100 MHz,  $\text{CDCl}_3$ ):  $\delta$  166.1, 157.9, 141.2, 131.4, 130.5, 127.7, 68.4, 66.8, 64.3, 62.7, 58.5, 58.1, 52.4; IR  $\nu_{\text{max}}$  (neat)/ $\text{cm}^{-1}$ : 3229 (m), 3132(w), 2957 (w), 2919 (w), 2849 (w), 1731 (s), 1714 (s), 1434 (m), 1278 (s), 1243 (s), 1110 (s), 1033 (s), 1018 (s), 770 (m); HRMS (ESI,  $m/z$ ): calcd for  $\text{C}_{12}\text{H}_{13}\text{NO}_4\text{Cl}^+$  ( $\text{M} + \text{H}^+$ ), 270.0533, found 270.0535.

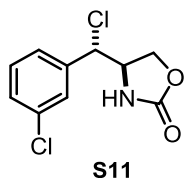

**4-(chloro(3-chlorophenyl)methyl)oxazolidin-2-one (S11)** : by following the general procedure, **S11** was obtained as a white solid (33 mg, 67% yield, *dr*: 10:1, m.p. 107–109 °C).  $^1\text{H}$  NMR (400 MHz,  $\text{CDCl}_3$ ):  $\delta$  7.38–7.32 (m, 3H), 7.24 (s, 1H), 5.10 (s, 1H), 4.66 (d,  $J = 9.0$  Hz, 1H), 4.59 (t,  $J = 8.8$  Hz, 1H), 4.44 (dd,  $J = 9.7, 4.8$  Hz, 1H), 4.21 (td,  $J = 8.8, 5.1$  Hz, 1H);  $^{13}\text{C}$  NMR (100 MHz,

CDCl<sub>3</sub>):  $\delta$  158.0, 138.5, 135.3, 130.6, 129.9, 127.8, 125.9, 68.4, 62.5, 58.2; IR  $\nu_{\max}$  (neat)/cm<sup>-1</sup>: 3271 (m), 2918 (w), 1749 (s), 1233 (w), 1027 (m), 700 (m); HRMS (ESI, *m/z*): calcd for C<sub>10</sub>H<sub>10</sub>NO<sub>2</sub>Cl<sub>2</sub><sup>+</sup> (M + H<sup>+</sup>), 246.0089, found 246.0081.

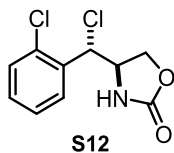

**4-(Chloro(2-chlorophenyl)methyl)oxazolidin-2-one (S12)** : by following the general procedure, **S12** was obtained as a white solid (37 mg, 76% yield, *dr*: 10:1, m.p. 93–95 °C). <sup>1</sup>H NMR (400 MHz, CDCl<sub>3</sub>):  $\delta$  7.56 (dd, *J* = 7.5, 2.0 Hz, 1H), 7.43 (dd, *J* = 7.6, 1.7 Hz, 1H), 7.40–7.30 (m, 2H), 5.48 (s, 1H), 5.42 (d, *J* = 8.0 Hz, 1H), 4.55 (dd, *J* = 9.3, 8.2 Hz, 1H), 4.47 (dd, *J* = 9.3, 4.4 Hz, 1H), 4.39 (td, *J* = 8.1, 4.5 Hz, 1H); <sup>13</sup>C NMR (100 MHz, CDCl<sub>3</sub>):  $\delta$  158.4, 134.0, 133.7, 130.6, 130.2, 129.0, 127.9, 67.9, 58.7, 57.4; IR  $\nu_{\max}$  (neat)/cm<sup>-1</sup>: 3255 (m), 3020 (w), 2982 (w), 2917 (w), 1742 (s), 1475 (m), 1402 (m), 1234 (m), 1023 (m), 736 (m), 698 (m); HRMS (ESI, *m/z*): calcd for C<sub>10</sub>H<sub>10</sub>NO<sub>2</sub>Cl<sub>2</sub><sup>+</sup> (M + H<sup>+</sup>), 246.0089, found 246.0081.

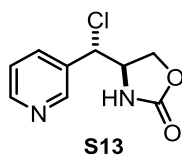

**4-(Chloro(pyridin-3-yl)methyl)oxazolidin-2-one (S13)** : by following the general procedure, **S13** was obtained as a white solid (32 mg, 76% yield, *dr* : 12:1, m.p. 121–124 °C). <sup>1</sup>H NMR (400 MHz, CDCl<sub>3</sub>)  $\delta$  8.62 (d, *J* = 2.2 Hz, 1H), 8.59 (dd, *J* = 4.8, 1.4 Hz, 1H), 7.77 (dt, *J* = 7.9, 1.9 Hz, 1H), 7.37 (dd, *J* = 7.9, 4.8 Hz, 1H), 5.64 (s, 1H), 4.77 (d, *J* = 8.8 Hz, 1H), 4.63 (dd, *J* = 9.4, 8.4 Hz, 1H), 4.47 (dd, *J* = 9.5, 4.6 Hz, 1H), 4.30 (tdd, *J* = 8.6, 4.6, 1.1 Hz, 1H); <sup>13</sup>C NMR (100 MHz, CDCl<sub>3</sub>):  $\delta$  158.2, 150.8, 149.0, 135.4, 132.6, 124.1, 68.3, 60.8, 58.2; IR  $\nu_{\max}$  (neat)/cm<sup>-1</sup>: 3238 (m), 3133 (w), 2957 (w), 2924 (w), 2854 (w), 1742 (s), 1428 (m), 1406 (m), 1234 (m), 1026 (m), 711 (m); HRMS (ESI, *m/z*): calcd for C<sub>9</sub>H<sub>10</sub>N<sub>2</sub>O<sub>2</sub>Cl<sup>+</sup> (M + H<sup>+</sup>), 213.0431, found 213.0437.

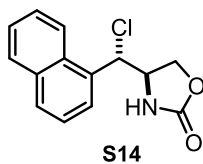

**4-(Chloro(naphthalen-1-yl)methyl)oxazolidin-2-one (S14)** : by following the general procedure and carrying out reaction at  $-15\text{ }^{\circ}\text{C}$ , **S14** was obtained as a white solid (32 mg, 61% yield,  $dr > 20:1$ , m.p.  $134\text{--}136\text{ }^{\circ}\text{C}$ ).  $^1\text{H}$  NMR (400 MHz,  $\text{CD}_3\text{CN}$ ):  $\delta$  8.24 (d,  $J = 8.5$  Hz, 1H), 8.00 (t,  $J = 7.6$  Hz, 2H), 7.75 (d,  $J = 7.2$  Hz, 1H), 7.71–7.64 (m, 1H), 7.64–7.57 (m, 2H), 5.97 (s, 1H), 5.88 (d,  $J = 7.9$  Hz, 1H), 4.76–4.68 (m, 1H), 4.61 (t,  $J = 8.6$  Hz, 1H), 4.55 (dd,  $J = 9.1, 5.2$  Hz, 1H);  $^{13}\text{C}$  NMR (100 MHz,  $\text{CD}_3\text{CN}$ ):  $\delta$  158.3, 134.0, 133.0, 130.9, 129.8, 129.0, 127.0, 126.3, 126.0, 125.6, 122.8, 67.7, 56.5; IR  $\nu_{\text{max}}$  (neat)/ $\text{cm}^{-1}$ : 3250 (m), 2923 (w), 1756(s), 1712 (s), 1485 (m), 1416 (m), 1230(s), 1027(s), 760 (s); HRMS (ESI,  $m/z$ ): calcd for  $\text{C}_{14}\text{H}_{13}\text{O}_2\text{NCl}^+$  ( $\text{M} + \text{H}^+$ ), 262.0629, found 262.0623.

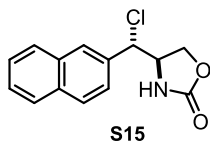

**4-(Chloro(naphthalen-2-yl)methyl)oxazolidin-2-one (S15)**: by following the general procedure and carrying out reaction at  $-15\text{ }^{\circ}\text{C}$ , **S15** was obtained as a white solid (31 mg, 59% yield,  $dr > 20:1$ , m.p.  $136\text{--}139\text{ }^{\circ}\text{C}$ ).  $^1\text{H}$  NMR (400 MHz,  $\text{CDCl}_3$ ):  $\delta$  7.92 (d,  $J = 8.6$  Hz, 1H), 7.86 (dt,  $J = 6.4, 3.3$  Hz, 2H), 7.83 (d,  $J = 1.8$  Hz, 1H), 7.56 (dt,  $J = 6.2, 3.4$  Hz, 2H), 7.50 (dd,  $J = 8.5, 1.9$  Hz, 1H), 4.88 (d,  $J = 9.3$  Hz, 1H), 4.85 (s, 1H), 4.66 (dd,  $J = 9.4, 8.1$  Hz, 1H), 4.54 (dd,  $J = 9.4, 4.7$  Hz, 1H), 4.37 (td,  $J = 8.8, 5.0$  Hz, 1H);  $^{13}\text{C}$  NMR (100 MHz,  $\text{CDCl}_3$ ):  $\delta$  157.9, 133.7, 133.6, 132.9, 129.7, 128.1, 127.8, 127.7, 127.3, 127.2, 124.0, 68.6, 63.8, 58.2; IR  $\nu_{\text{max}}$  (neat)/ $\text{cm}^{-1}$ : 3253 (m), 3144(w), 2918 (w), 1744 (s), 1709(s), 1479 (m), 1409 (m), 1244(s), 1017(s), 761 (s); HRMS (ESI,  $m/z$ ): calcd for  $\text{C}_{14}\text{H}_{13}\text{O}_2\text{NClH}^+$  ( $\text{M} + \text{H}^+$ ), 262.0629, found 262.0624.

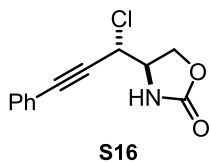

**4-(1-Chloro-3-phenylprop-2-yn-1-yl)oxazolidin-2-one (S16)**: by following the general procedure and carrying out reaction at -15 °C, **S16** and its *syn*-diastereomer were obtained as a white solid (44 mg, 93% yield, *dr*: 7:1). **S16**:  $^1\text{H}$  NMR (400 MHz,  $\text{CDCl}_3$ ):  $\delta$  7.47–7.45 (m, 2H), 7.39–7.32 (m, 3H), 5.83 (s, 1H), 4.76 (d,  $J = 6.4$  Hz, 1H), 4.60 (dd,  $J = 9.5, 8.5$  Hz, 1H), 4.52 (dd,  $J = 9.6, 4.1$  Hz, 1H), 4.23 (ddd,  $J = 8.3, 6.4, 4.1$  Hz, 1H);  $^{13}\text{C}$  NMR (100 MHz,  $\text{CDCl}_3$ ):  $\delta$  158.3, 132.0, 129.6, 128.5, 120.8, 88.9, 81.8, 67.1, 57.6, 51.0; its *syn*-diastereomer:  $^1\text{H}$  NMR (400 MHz,  $\text{CDCl}_3$ ):  $\delta$  7.50–7.43 (m, 2H), 7.40–7.31 (m, 3H), 5.79 (s, 1H), 4.73 (d,  $J = 6.2$  Hz, 1H), 4.55–4.61 (m, 1H), 4.45 (dd,  $J = 9.5, 3.9$  Hz, 1H), 4.30–4.25 (m, 1H);  $^{13}\text{C}$  NMR (100 MHz,  $\text{CDCl}_3$ ):  $\delta$  158.3, 132.0, 129.6, 128.5, 120.8, 88.9, 81.8, 67.1, 57.5, 51.0; IR  $\nu_{\text{max}}$  (neat)/ $\text{cm}^{-1}$ : 3270 (m), 3021 (w), 2980 (w), 2226 (w), 1754 (s), 1233 (s), 1039 (m), 934 (m), 758 (m); HRMS (ESI,  $m/z$ ): calcd for  $\text{C}_{12}\text{H}_{11}\text{NO}_2\text{Cl}^+$  ( $\text{M} + \text{H}^+$ ), 236.0478, found 236.0487.

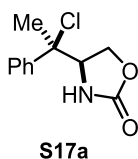

**4-(1-Chloro-1-phenylethyl)oxazolidin-2-one (S17a)** : by following the general procedure, **S17a** was obtained as a white solid (22 mg, 50% yield, *dr* >20:1, m.p. 75–77 °C). Its relative chemistry was determined by comparison of the  $^1\text{H}$  NMR data with the literature data.<sup>2</sup>  $^1\text{H}$  NMR (400 MHz,  $\text{CDCl}_3$ )  $\delta$  7.53 (d,  $J = 7.9$  Hz, 2H), 7.47–7.31 (m, 3H), 5.18 (s, 1H), 4.46 (dd,  $J = 6.3, 1.9$  Hz, 2H), 4.33 (t,  $J = 6.5$  Hz, 1H), 1.98 (d,  $J = 1.9$  Hz, 3H);  $^{13}\text{C}$  NMR (100 MHz,  $\text{CDCl}_3$ )  $\delta$  158.7, 140.5, 128.9, 128.8, 126.6, 72.3, 66.8, 62.2, 24.7; IR  $\nu_{\text{max}}$  (neat)/ $\text{cm}^{-1}$ : 3260 (m), 3120 (w), 2996 (w), 2915 (w), 1730(s), 1035 (w), 1232 (m), 1040 (m), 709 (m); HRMS (ESI,  $m/z$ ): calcd for  $\text{C}_{11}\text{H}_{13}\text{NO}_2\text{Cl}^+$  ( $\text{M} + \text{H}^+$ ), 226.0635, found 226.0640.

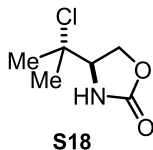

**4-(2-Chloropropan-2-yl)oxazolidin-2-one (S18)** : by following the general procedure, **S18** was obtained as a white solid (25 mg, 76% yield, m.p. 53–56 °C).  $^1\text{H}$  NMR (400 MHz,  $\text{CDCl}_3$ ):  $\delta$

6.58 (s, 1H), 4.47 (t,  $J = 9.2$  Hz, 1H), 4.35 (dd,  $J = 9.5, 4.6$  Hz, 1H), 3.98 (dd,  $J = 8.9, 4.6$  Hz, 1H), 1.56 (s, 6H);  $^{13}\text{C}$  NMR (100 MHz,  $\text{CDCl}_3$ ):  $\delta$  159.6, 69.4, 66.7, 61.8, 27.8, 26.8; IR  $\nu_{\text{max}}$  (neat)/ $\text{cm}^{-1}$ : 2923 (s), 2860(s), 1763 (s), 1481 (w), 1340 (m), 1220(s), 1049(s), 809 (s); HRMS (ESI,  $m/z$ ): calcd for  $\text{C}_6\text{H}_{11}\text{NO}_2\text{Cl}^+$  ( $\text{M} + \text{H}^+$ ), 164.0422, found 164.0417.

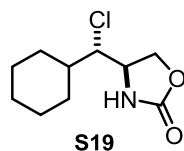

**(±)-4-(Chloro(cyclohexyl)methyl)oxazolidin-2-one (S19)** : by following the general procedure and carrying out the reaction for 5 h, **S19** was obtained as a white solid (30 mg, 69% yield,  $dr >20:1$ , m.p. 115–118 °C).  $^1\text{H}$  NMR (400 MHz,  $\text{CDCl}_3$ ):  $\delta$  7.16 (s, 1H), 4.52 (t,  $J = 8.8$  Hz, 1H), 4.34 (dd,  $J = 9.1, 5.4$  Hz, 1H), 4.11 (td,  $J = 8.4, 5.4$  Hz, 1H), 3.77 (dd,  $J = 8.4, 3.4$  Hz, 1H), 1.84–1.62 (m, 6H), 1.51–1.01 (m, 5H);  $^{13}\text{C}$  NMR (100 MHz,  $\text{CDCl}_3$ ):  $\delta$  160.1, 69.7, 68.9, 54.5, 39.8, 30.7, 26.2, 26.0, 25.9, 25.5; IR  $\nu_{\text{max}}$  (neat)/ $\text{cm}^{-1}$ : 2925 (s), 2851(s), 1759 (s), 1482 (w), 1375 (m), 1227(s), 1149(s), 1035 (s), 820 (s); HRMS (ESI,  $m/z$ ): calcd for  $\text{C}_{10}\text{H}_{17}\text{O}_2\text{NCl}^+$  ( $\text{M} + \text{H}^+$ ), 218.0942, found 218.0937.

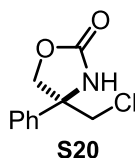

**4-(Chloromethyl)-4-phenyloxazolidin-2-one (S20)**: by following the general procedure and carrying out the reaction for 12 h, **S20** was obtained as a white solid (32 mg, 77% yield, m.p. 109–112 °C).  $^1\text{H}$  NMR (400 MHz,  $\text{CDCl}_3$ ):  $\delta$  7.46–7.42 (m, 2H), 7.39–7.36 (m, 1H), 7.32–7.30 (m, 2H), 6.50 (s, 1H), 4.66 (d,  $J = 8.9$  Hz, 1H), 4.44 (d,  $J = 8.9$  Hz, 1H), 3.93 (d,  $J = 11.7$  Hz, 1H), 3.88 (d,  $J = 11.7$  Hz, 1H);  $^{13}\text{C}$  NMR (100 MHz,  $\text{CDCl}_3$ ):  $\delta$  158.9, 139.6, 129.3, 128.7, 124.9, 74.1, 64.1, 51.3; IR  $\nu_{\text{max}}$  (neat)/ $\text{cm}^{-1}$ : 3266 (m), 2912 (w), 2853 (w), 1753 (s), 1396 (w), 1094 (s), 1052 (w); HRMS (ESI,  $m/z$ ): calcd for  $\text{C}_{10}\text{H}_{11}\text{NO}_2\text{Cl}^+$  ( $\text{M} + \text{H}^+$ ), 212.0478, found 212.0479.

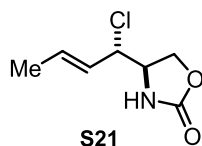

**4-(*E*-1-chlorobut-2-en-1-yl)oxazolidin-2-one (S21)** : by following the general procedure, **S21** and its *syn*-diastereomer were obtained as white solids (31 mg, 88% yield, *dr*: 1.5:1). **S21**:  $^1\text{H}$  NMR (400 MHz,  $\text{CDCl}_3$ ):  $\delta$  6.15 (s, 1H), 5.88 (dd,  $J = 12.5, 6.0$  Hz, 1H), 5.50–5.39 (m, 1H), 4.50 (t,  $J = 8.9$  Hz, 1H), 4.32 (dd,  $J = 9.2, 4.9$  Hz, 1H), 4.24 (dd,  $J = 17.6, 9.4$  Hz, 1H), 4.04–3.95 (m, 1H), 1.77 (d,  $J = 5.1$  Hz, 3H);  $^{13}\text{C}$  NMR (100 MHz,  $\text{CDCl}_3$ ):  $\delta$  159.1, 133.9, 126.4, 67.8, 63.5, 57.1, 17.8; its *syn*-diastereomer:  $^1\text{H}$  NMR (400 MHz,  $\text{CDCl}_3$ ):  $\delta$  6.26 (s, 1H), 5.93 (dd,  $J = 11.7, 6.4$  Hz, 1H), 5.50–5.39 (m, 1H), 4.41 (t,  $J = 9.0$  Hz, 1H), 4.21–4.16 (m, 1H), 4.04–3.95 (m, 1H), 1.75–1.73 (d,  $J = 5.0$  Hz, 3H);  $^{13}\text{C}$  NMR (100 MHz,  $\text{CDCl}_3$ ):  $\delta$  158.9, 133.9, 125.7, 66.9, 64.3, 57.3, 17.8; IR  $\nu_{\text{max}}$  (neat)/ $\text{cm}^{-1}$ : 3238 (m), 3135 (w), 2972 (w), 2925 (m), 2852 (w), 1760(s), 1667 (m), 1403 (m), 1234 (s), 1004 (m), 966 (s), 1027(s), 742 (s); HRMS (ESI,  $m/z$ ): calcd for  $\text{C}_7\text{H}_{10}\text{NO}_2\text{NaCl}^+$  ( $\text{M} + \text{Na}^+$ ), 198.0298, found 198.0304.

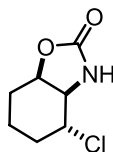

**4-Chlorohexahydrobenzo[d]oxazol-2(3H)-one (S22)**: by following the general procedure, **S22** was obtained as a white solid (22 mg, 64% yield, *dr* >20:1, m.p. 112–114 °C).  $^1\text{H}$  NMR (400 MHz,  $\text{CDCl}_3$ ):  $\delta$  5.63 (s, 1H), 4.71 (dt,  $J = 6.3, 3.2$  Hz, 1H), 3.80 (ddd,  $J = 12.2, 8.6, 4.3$  Hz, 1H), 3.62 (dd,  $J = 8.5, 6.1$  Hz, 1H), 2.32–2.09 (m, 2H), 1.76–1.52 (m, 4H);  $^{13}\text{C}$  NMR (100 MHz,  $\text{CDCl}_3$ ):  $\delta$  159.1, 77.0, 62.2, 60.6, 31.8, 25.9, 19.7; IR  $\nu_{\text{max}}$  (neat)/ $\text{cm}^{-1}$ : 3272 (m), 2948 (w), 2885 (w), 1751 (s), 1201 (w); HRMS (ESI,  $m/z$ ): calcd for  $\text{C}_7\text{H}_{11}\text{NO}_2\text{Cl}^+$  ( $\text{M} + \text{H}^+$ ), 176.0478, found 176.0480.

### C. Catalyst Discovery and Procedures for the Iron-Catalyzed Asymmetric Olefin Aminochlorination Reaction

## a. Catalyst Discovery for the Iron-Catalyzed Asymmetric Olefin Aminochlorination

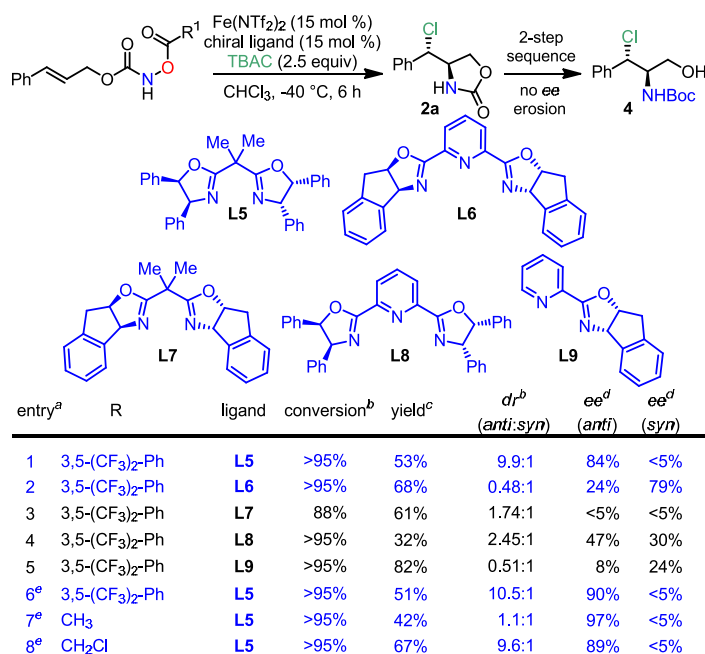

**Table S2.** Catalyst discovery for the iron-catalyzed asymmetric olefin aminochlorination reaction

Chiral ligands **L5–L9** were synthesized by following literature procedures.<sup>2, 5-7</sup>

**Procedure for the Catalyst Discovery.** To a flame-dried sealable 2-dram vial (vial **A**) equipped with a magnetic stir bar were added Fe(NTf<sub>2</sub>)<sub>2</sub> (9.2 mg, 0.015 mmol) and a chiral ligand (0.015 mmol). After the vial was evacuated and backfilled with N<sub>2</sub> for three times, re-distilled and anhydrous CHCl<sub>3</sub> (1.0 mL) was added and the mixture was stirred at room temperature for 20 min. During this time, substrate (0.1 mmol) and anhydrous TBAC (69.5 mg, 0.25 mmol) were dissolved in CHCl<sub>3</sub> (3.0 mL, re-distilled and anhydrous) in a second flame-dried 2-dram vial (vial **B**) with a magnetic stir bar and freshly activated 4 Å molecular sieves under N<sub>2</sub> atmosphere. Both vials were degassed by brief evacuation and back filling with N<sub>2</sub> twice. The vial **B** was cooled down to -60 °C, and the solution in vial **A** was added to vial **B** drop wise via a syringe. The resulting solution was stirred at the same temperature for 12 h and quenched with 1 mL saturated NaHCO<sub>3</sub> solution. The reaction mixture was extracted with CH<sub>2</sub>Cl<sub>2</sub> (1.5 mL × 3), and the combined organic phase was concentrated *in vacuo*. The residue was purified through a gradient silica gel flash column chromatography (hexanes/acetone: from 15:1 to 4:1) to afford

the aminochlorination product as a white solid. The *dr* was determined by  $^1\text{H}$  NMR analysis and the *ee* was measured by chiral HPLC analysis. The results are listed in the table (Table S2). The absolute stereochemistry was determined by X-ray crystallographic analysis of a structural analog of **2a** with heavy atoms.

The racemic products with low *dr* (for HPLC assay purposes) were obtained by following the general procedure of the iron-catalyzed diastereoselective olefin aminochlorination under the ligand-free condition (Table S1, entry 1).

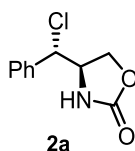

**(S)-4-((R)-chloro(phenyl)methyl)oxazolidin-2-one (2a)**: by following the general procedure under the condition described in entry 8, the product **2a** obtained as a white solid (15 mg, 67% yield, *dr*: 9.6:1).  $[\alpha]_{\text{D}}^{20} = +56.4^\circ$  (*c* 1.0,  $\text{CH}_2\text{Cl}_2$ ). The *ee* was determined by Chiral HPLC analysis (Chiral OD-H column, 10% EtOH in hexanes, flow rate = 1.0 mL/min, UV detection at 205 nm). The *anti*-diastereomer (**2a**):  $t_{\text{r}}$  (minor) = 19.5 min,  $t_{\text{r}}$  (major) = 22.4 min, 89% *ee*; the *syn*-diastereomer (**2b**):  $t_{\text{r}}$  (minor) = 23.8 min,  $t_{\text{r}}$  (major) = 30.9 min, <5% *ee*.

*Racemic sample*

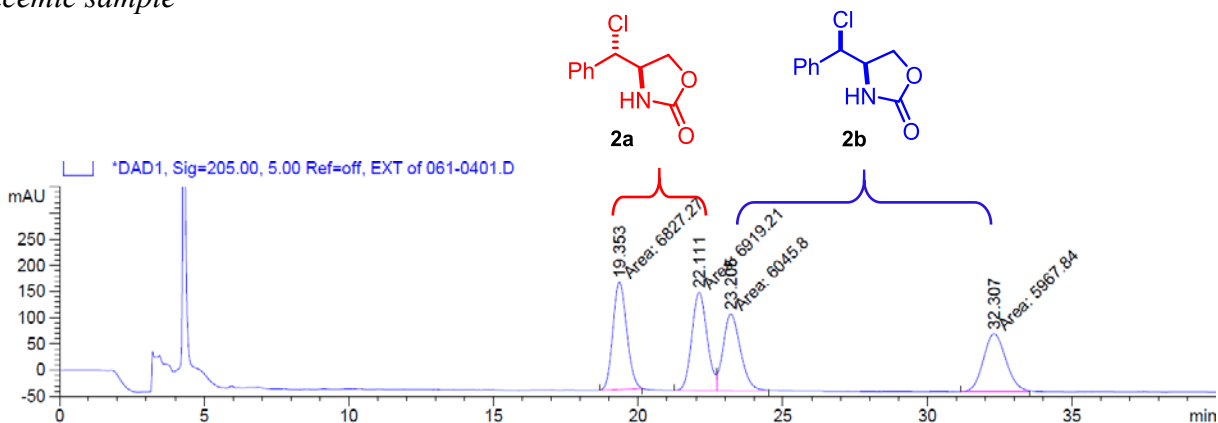



| Peak # | RetTime [min] | Type | Width [min] | Area [mAU*s] | Height [mAU] | Area %  |
|--------|---------------|------|-------------|--------------|--------------|---------|
| 1      | 19.353        | MM   | 0.5534      | 6827.27100   | 205.61459    | 26.5033 |
| 2      | 22.111        | MF   | 0.6171      | 6919.21436   | 186.88011    | 26.8602 |
| 3      | 23.205        | FM   | 0.6898      | 6045.79639   | 146.08553    | 23.4696 |
| 4      | 32.307        | MF   | 0.9027      | 5967.84473   | 110.18359    | 23.1670 |

*Enantio-enriched sample (anti-diastereomer, 2a, 89% ee)*

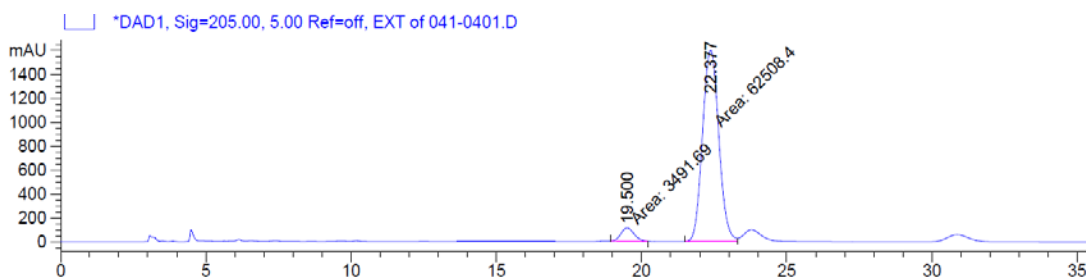

| Peak # | RetTime [min] | Type | Width [min] | Area [mAU*s] | Height [mAU] | Area %  |
|--------|---------------|------|-------------|--------------|--------------|---------|
| 1      | 19.500        | MM   | 0.5234      | 3491.69165   | 111.19152    | 5.2904  |
| 2      | 22.377        | FM   | 0.6517      | 6.25084e4    | 1598.60620   | 94.7096 |

*Enantio-enriched sample (syn-diastereomer, 2b, <5% ee)*

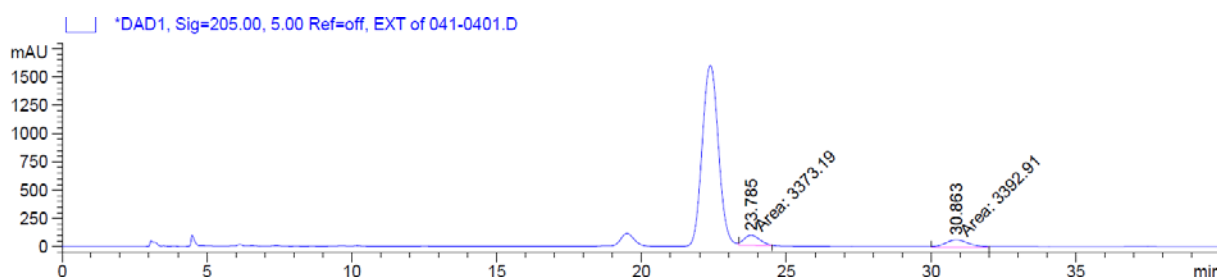

| Peak # | RetTime [min] | Type | Width [min] | Area [mAU*s] | Height [mAU] | Area %  |
|--------|---------------|------|-------------|--------------|--------------|---------|
| 1      | 23.785        | MM   | 0.6270      | 3373.19238   | 89.67115     | 49.8543 |
| 2      | 30.863        | MM   | 0.8864      | 3392.90967   | 63.79350     | 50.1457 |

Totals : 6766.10205 153.46465

## b. Synthesis and Characterization of New Substrates (S23–S34)

Chloroacetoxy carbamates were synthesized by following a known procedure.<sup>1</sup>

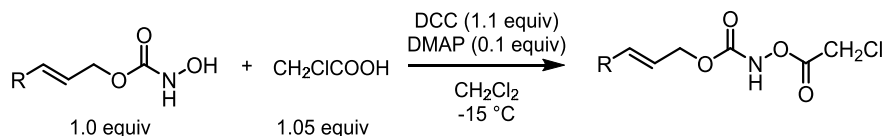

**General Procedure.** To a flame-dried round bottom flask equipped with a magnetic stir bar were added a hydroxyl carbamate (5.0 mmol, 1.0 equiv), chloroacetic acid (5.25 mmol, 1.05 equiv) and anhydrous  $\text{CH}_2\text{Cl}_2$  (50 mL). After stirring at  $-15^\circ\text{C}$  for 2 min, DCC (5.5 mmol, 1.1 equiv) and DMAP (0.5 mmol, 0.1 equiv) in  $\text{CH}_2\text{Cl}_2$  (10 mL) was added drop wise. The reaction mixture was stirred at the same temperature until all the hydroxyl carbamate was fully consumed monitored by TLC. The reaction mixture was filtered to remove *N, N'*-dicyclohexylurea (DCU). The filtrate was concentrated *in vacuo*, and then diethyl ether (20 mL) was added. The mixture was cooled in a refrigerator for 0.5 h and filtered again to remove the additional DCU. The filtrate was concentrated *in vacuo* and the residue was purified through a rapid gradient silica gel flash column chromatography (hexanes/acetone: from 10:1 to 3:1) and further recrystallization from a mixture of hexanes/EtOAc to afford the desired products (59–86% yield). *Note: Most chloroacetoxy carbamates must be purified rapidly by flash columns (flash rate: ca. 50 mL/min) because they tend to undergo hydrolysis upon exposure to silica gel for an extended period of time.*

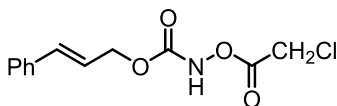

**S23**

***E*-Cinnamyl (2-chloroacetoxy)carbamate (S23):** by following the general procedure, **S23** was obtained as a white solid (79% yield, m.p. 50–51 °C). <sup>1</sup>H NMR (400 MHz,  $\text{CDCl}_3$ ):  $\delta$  8.48 (s, 1H), 7.40–7.38 (m, 2H), 7.35–7.28 (m, 3H), 6.68 (d,  $J = 15.9$  Hz, 1H), 6.26 (dt,  $J = 15.9, 6.5$  Hz, 1H), 4.85 (dd,  $J = 6.5, 1.1$  Hz, 2H), 4.21 (s, 2H); <sup>13</sup>C NMR (100 MHz,  $\text{CDCl}_3$ ):  $\delta$  166.8, 156.1, 135.9, 135.4, 128.7, 128.4, 126.8, 121.9, 67.6, 38.6; IR  $\nu_{\text{max}}$  (neat)/ $\text{cm}^{-1}$ : 3257 (m), 3027 (w),

2955 (w), 1793 (m), 1733 (s), 1448 (s), 1244 (m), 1214 (m), 1050 (s), 1025 (m), 804 (m), 770 (s), 698 (s); HRMS (ESI,  $m/z$ ): calcd for  $C_{12}H_{12}O_4NCINa^+$  ( $M + Na^+$ ), 292.0347, found 292.0339.

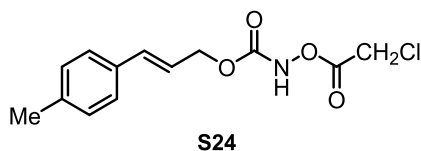

**(E)-3-(p-tolyl)allyl (2-chloroacetoxy)carbamate (S24):** by following the general procedure, **S24** was obtained as a white solid (82% yield, m.p. 72–74 °C).  $^1H$  NMR (400 MHz,  $CDCl_3$ ):  $\delta$  8.19 (s, 1H), 7.29 (d,  $J = 8.0$  Hz, 2H), 7.14 (d,  $J = 7.7$  Hz, 2H), 6.66 (d,  $J = 15.8$  Hz, 1H), 6.22 (dt,  $J = 15.8, 6.6$  Hz, 1H), 4.84 (d,  $J = 6.6$  Hz, 2H), 4.22 (s, 2H), 2.34 (s, 3H);  $^{13}C$  NMR (100 MHz,  $CDCl_3$ ):  $\delta$  166.7, 155.9, 138.4, 135.6, 133.0, 129.4, 126.7, 120.7, 67.8, 38.5, 21.3; IR  $\nu_{max}$  (neat)/ $cm^{-1}$ : 3212 (m), 3007 (w), 2958 (w), 1807 (m), 1741 (m), 1716 (s), 1481 (s), 1268 (m), 1110 (s), 978 (m), 817 (m), 794 (m); HRMS (ESI,  $m/z$ ): calcd for  $C_{13}H_{14}O_4NCINa^+$  ( $M + Na^+$ ), 306.0504, found 306.0496.

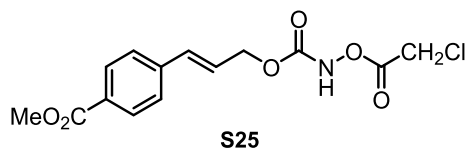

**Methyl (E)-4-(3-(((2-chloroacetoxy)carbamoyl)oxy)prop-1-en-1-yl)benzoate (S25):** by following the general procedure, **S25** was obtained as a white solid (68% yield, m.p. 72–75 °C).  $^1H$  NMR (400 MHz,  $CDCl_3$ ):  $\delta$  8.20 (s, 1H), 8.02 (d,  $J = 8.4$  Hz, 2H), 7.47 (d,  $J = 8.4$  Hz, 2H), 6.74 (d,  $J = 15.8$  Hz, 1H), 6.39 (dt,  $J = 15.9, 6.3$  Hz, 1H), 4.90 (dd,  $J = 6.3, 1.4$  Hz, 2H), 4.25 (s, 2H), 3.94 (s, 3H);  $^{13}C$  NMR (100 MHz,  $CDCl_3$ ):  $\delta$  166.8, 156.0, 136.7, 135.8, 134.6, 128.7, 128.0, 127.3, 126.6, 125.4, 67.4, 38.6; IR  $\nu_{max}$  (neat)/ $cm^{-1}$ : 3262 (m), 3015 (w), 2954 (w), 1793 (w), 1747 (m), 1696 (s), 1435 (m), 1280 (s), 1252 (s), 1130 (s), 960 (m), 750 (s); HRMS (ESI,  $m/z$ ): calcd for  $C_{14}H_{14}O_6NCINa^+$  ( $M + Na^+$ ), 350.0402, found 350.0391.

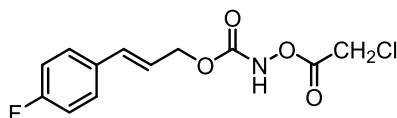

S26

**(E)-3-(4-fluorophenyl)allyl (2-chloroacetoxy)carbamate (S26):** by following the general procedure, **S26** was obtained as a white solid (86% yield, m.p. 68–70 °C). <sup>1</sup>H NMR (400 MHz, CDCl<sub>3</sub>): δ 8.40 (s, 1H), 7.37 (dd, *J* = 8.4, 5.3 Hz, 2H), 7.03 (t, *J* = 8.5 Hz, 2H), 6.66 (d, *J* = 15.8 Hz, 1H), 6.20 (dt, *J* = 15.9, 6.6 Hz, 1H), 4.85 (d, *J* = 6.6 Hz, 2H), 4.24 (s, 2H); <sup>13</sup>C NMR (100 MHz, CDCl<sub>3</sub>): δ 166.8, 162.7 (d, *J* = 247.9 Hz), 155.9, 134.2, 132.0 (d, *J* = 3.3 Hz), 128.4 (d, *J* = 8.1 Hz), 121.6 (d, *J* = 2.3 Hz), 115.6 (d, *J* = 21.7 Hz), 67.5, 38.5; <sup>19</sup>F NMR (376 MHz, CDCl<sub>3</sub>): δ -113.2 (tt, *J* = 9.0, 5.1 Hz); IR  $\nu_{\max}$  (neat)/cm<sup>-1</sup>: 3199 (m), 3006 (w), 2957 (w), 1805 (s), 1739 (s), 1715 (s), 1507 (s), 1481(s), 1266 (s), 1226 (s), 1115 (s), 982 (s), 821 (m), 763 (m); HRMS (ESI, *m/z*): calcd for C<sub>12</sub>H<sub>11</sub>O<sub>4</sub>NCIFNa<sup>+</sup> (M + Na<sup>+</sup>), 310.0253, found 310.0244.

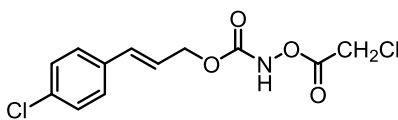

S27

**(E)-3-(4-chlorophenyl)allyl (2-chloroacetoxy)carbamate (S27):** by following the general procedure, **S27** was obtained as a white solid (76% yield, m.p. 80–82 °C). <sup>1</sup>H NMR (400 MHz, CDCl<sub>3</sub>): δ 8.19 (s, 1H), 7.33–7.28 (m, 4H), 6.64 (d, *J* = 15.9 Hz, 1H), 6.24 (dt, *J* = 15.9, 6.5 Hz, 1H), 4.85 (dd, *J* = 6.5, 1.3 Hz, 2H), 4.23 (s, 2H); <sup>13</sup>C NMR (100 MHz, CDCl<sub>3</sub>): δ 166.8, 155.8, 134.3, 134.1, 134.1, 128.9, 127.9, 122.5, 67.4, 38.5; IR  $\nu_{\max}$  (neat)/cm<sup>-1</sup>: 3200 (s), 3007 (w), 2941 (w), 1805 (s), 1739 (m), 1714 (s), 1481(s), 1405 (m), 1264 (s), 1115 (s), 1089 (s), 978 (s), 799 (s); HRMS (ESI, *m/z*): calcd for C<sub>12</sub>H<sub>11</sub>O<sub>4</sub>NCl<sub>2</sub>Na<sup>+</sup> (M + Na<sup>+</sup>), 325.9957, found 325.9948.

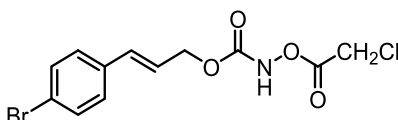

S28

**(E)-3-(4-bromophenyl)allyl (2-chloroacetoxy)carbamate (S28):** by following the general procedure, **S28** was obtained as a white solid (82% yield, m.p. 99–100 °C). <sup>1</sup>H NMR (400 MHz,

CDCl<sub>3</sub>):  $\delta$  8.18 (s, 1H), 7.45 (d,  $J$  = 8.5 Hz, 2H), 7.25 (d,  $J$  = 8.5 Hz, 2H), 6.62 (d,  $J$  = 15.8 Hz, 1H), 6.25 (dt,  $J$  = 15.9, 6.4 Hz, 1H), 4.84 (dd,  $J$  = 6.4, 1.3 Hz, 2H), 4.22 (s, 2H); <sup>13</sup>C NMR (100 MHz, CDCl<sub>3</sub>):  $\delta$  166.7, 155.8, 134.8, 134.1, 131.8, 128.2, 122.7, 122.3, 67.3, 38.5; IR  $\nu_{\max}$  (neat)/cm<sup>-1</sup>: 3675 (m), 3205 (w), 2988 (s), 2901 (s), 1804 (m), 1716 (s), 1483 (m), 1405 (m), 1265 (s), 1117 (s), 1027 (s), 797 (s); HRMS (ESI,  $m/z$ ): calcd for C<sub>12</sub>H<sub>11</sub>O<sub>4</sub>NBrClNa<sup>+</sup> (M + Na<sup>+</sup>), 369.9601, found 369.9596.

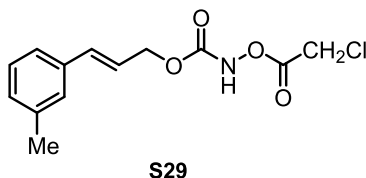

**(E)-3-(*m*-tolyl)allyl (2-chloroacetoxy)carbamate (S29)**: by following the general procedure, **S29** was obtained as a white solid (81% yield, m.p. 51–53 °C). <sup>1</sup>H NMR (400 MHz, CDCl<sub>3</sub>):  $\delta$  8.46 (s, 1H), 7.24–7.18 (m, 3H), 7.13–7.06 (m, 1H), 6.65 (d,  $J$  = 15.9 Hz, 1H), 6.25 (dt,  $J$  = 15.8, 6.6 Hz, 1H), 4.84 (dd,  $J$  = 6.6, 1.2 Hz, 2H), 4.21 (s, 2H), 2.35 (s, 3H); <sup>13</sup>C NMR (100 MHz, CDCl<sub>3</sub>):  $\delta$  166.8, 156.1, 138.3, 135.8, 135.6, 129.2, 128.6, 127.5, 123.9, 121.6, 67.7, 38.6, 21.4; IR  $\nu_{\max}$  (neat)/cm<sup>-1</sup>: 3206 (m), 3006 (w), 2960 (w), 1800 (m), 1744 (m), 1719 (s), 1480 (s), 1266 (m), 1112 (s), 975 (m), 819 (m), 791 (m); HRMS (ESI,  $m/z$ ): calcd for C<sub>13</sub>H<sub>14</sub>O<sub>4</sub>NCINa<sup>+</sup> (M + Na<sup>+</sup>), 306.0504, found 306.0496.

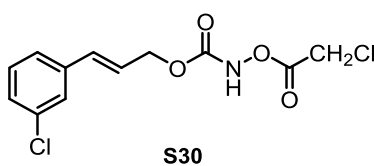

**(E)-3-(3-chlorophenyl)allyl (2-chloroacetoxy)carbamate (S30)**: by following the general procedure, **S30** was obtained as a white solid (77% yield, m.p. 49–51 °C). <sup>1</sup>H NMR (400 MHz, CDCl<sub>3</sub>):  $\delta$  8.29 (s, 1H), 7.37 (s, 1H), 7.28–7.22 (m, 3H), 6.62 (d,  $J$  = 16.0 Hz, 1H), 6.27 (dt,  $J$  = 15.8, 6.4 Hz, 1H), 4.85 (dd,  $J$  = 6.4, 1.2 Hz, 2H), 4.23 (s, 2H); <sup>13</sup>C NMR (100 MHz, CDCl<sub>3</sub>):  $\delta$  166.8, 155.8, 137.7, 134.6, 133.7, 129.9, 128.3, 126.6, 125.0, 123.5, 67.2, 38.5; IR  $\nu_{\max}$  (neat)/cm<sup>-1</sup>: 3206 (m), 2956 (w), 1778 (s), 1752 (s), 1722 (s), 1594 (m), 1565(m), 1460 (m), 1244

(s), 1215 (s), 1112 (s), 965 (s), 773 (s); HRMS (ESI,  $m/z$ ): calcd for  $C_{12}H_{11}O_4NCl_2Na^+$  ( $M + Na^+$ ), 325.9957, found 325.9947.

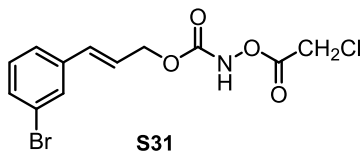

**(E)-3-(3-bromophenyl)allyl (2-chloroacetoxy)carbamate (S31)**: by following the general procedure, **S31** was obtained as a white solid (76% yield, m.p. 64–67 °C).  $^1H$  NMR (400 MHz,  $CDCl_3$ ):  $\delta$  8.28 (s, 1H), 7.53 (s, 1H), 7.40 (d,  $J = 7.8$  Hz, 1H), 7.30 (d,  $J = 7.8$  Hz, 1H), 7.20 (t,  $J = 7.8$  Hz, 1H), 6.61 (d,  $J = 16.0$  Hz, 1H), 6.27 (dt,  $J = 15.9, 6.4$  Hz, 1H), 4.85 (dd,  $J = 6.4, 1.4$  Hz, 2H), 4.22 (s, 2H);  $^{13}C$  NMR (100 MHz,  $CDCl_3$ ):  $\delta$  166.7, 155.8, 138.0, 133.6, 131.2, 130.2, 129.6, 125.4, 123.5, 122.8, 67.1, 38.5; IR  $\nu_{max}$  (neat)/ $cm^{-1}$ : 3206 (m), 3032 (w), 2971 (w), 2955 (w), 2930 (w), 1777 (s), 1750(s), 1563 (m), 1238 (s), 1136 (s), 966 (s), 799 (s); HRMS (ESI,  $m/z$ ): calcd for  $C_{12}H_{11}O_4NBrClNa^+$  ( $M + Na^+$ ), 369.9601, found 369.9596.

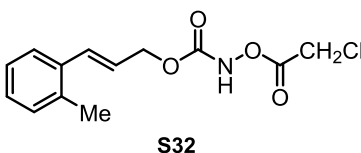

**(E)-3-(o-tolyl)allyl (2-chloroacetoxy)carbamate (S32)**: by following the general procedure, **S32** was obtained as a white solid (64% yield, m.p. 70–72 °C).  $^1H$  NMR (400 MHz,  $CDCl_3$ ):  $\delta$  8.24 (s, 1H), 7.45–7.42 (m, 1H), 7.21–7.14 (m, 3H), 6.92 (d,  $J = 15.7$  Hz, 1H), 6.16 (dt,  $J = 15.7, 6.6$  Hz, 1H), 4.87 (dd,  $J = 6.5, 1.0$  Hz, 2H), 4.22 (s, 2H), 2.35 (s, 3H);  $^{13}C$  NMR (100 MHz,  $CDCl_3$ ):  $\delta$  166.7, 155.9, 135.8, 135.0, 133.4, 130.4, 128.2, 126.2, 125.9, 123.1, 67.8, 38.5, 19.7; IR  $\nu_{max}$  (neat)/ $cm^{-1}$ : 3210 (m), 3004 (w), 2956 (w), 1807 (m), 1742 (m), 1715 (s), 1480 (s), 1272 (m), 1102 (s), 976 (m), 820 (m), 790 (m); HRMS (ESI,  $m/z$ ): calcd for  $C_{13}H_{14}O_4NClNa^+$  ( $M + Na^+$ ), 306.0504, found 306.0494.

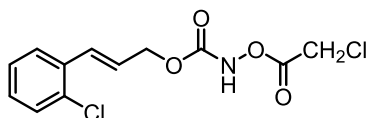

**S33**

**(E)-3-(2-chlorophenyl)allyl (2-chloroacetoxy)carbamate (S33):** by following the general procedure, **S33** was obtained as a white solid (69% yield, m.p. 78–80 °C). <sup>1</sup>H NMR (400 MHz, CDCl<sub>3</sub>): δ 8.16 (s, 1H), 7.58–7.47 (m, 1H), 7.42–7.31 (m, 1H), 7.25–7.18 (m, 2H), 7.08 (dt, *J* = 15.9, 1.4 Hz, 1H), 6.26 (dt, *J* = 15.8, 6.4 Hz, 1H), 4.90 (dd, *J* = 6.4, 1.4 Hz, 2H), 4.23 (s, 2H); <sup>13</sup>C NMR (100 MHz, CDCl<sub>3</sub>): δ 166.7, 155.7, 134.0, 133.4, 131.2, 129.8, 129.3, 127.1, 127.0, 124.7, 67.4, 38.5; IR  $\nu_{\max}$  (neat)/cm<sup>-1</sup>: 3200 (m), 3029 (w), 2973 (w), 2929 (w), 1777 (s), 1754 (s), 1455 (m), 1235 (s), 1133 (s), 969 (s), 804 (m), 726 (s); HRMS (ESI, *m/z*): calcd for C<sub>12</sub>H<sub>11</sub>O<sub>4</sub>NCl<sub>2</sub>Na<sup>+</sup> (*M* + Na<sup>+</sup>), 325.9957, found 325.9948.

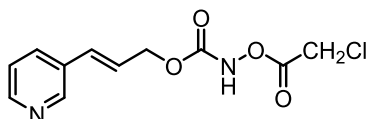

**S34**

**(E)-3-(pyridin-3-yl)allyl (2-chloroacetoxy)carbamate (S34):** by following the general procedure, **S34** was obtained as a white solid (55% yield, m.p. 69–71 °C). <sup>1</sup>H NMR (400 MHz, CDCl<sub>3</sub>): δ 9.03 (s, 1H), 8.61 (d, *J* = 2.2 Hz, 1H), 8.50 (dd, *J* = 4.8, 1.6 Hz, 1H), 7.72 (dt, *J* = 8.0, 2.0 Hz, 1H), 7.30–7.27 (m, 1H), 6.67 (d, *J* = 16.0 Hz, 1H), 6.34 (dt, *J* = 16.0, 6.2 Hz, 1H), 4.87 (dd, *J* = 6.2, 1.4 Hz, 2H), 4.23 (s, 2H); <sup>13</sup>C NMR (100 MHz, CDCl<sub>3</sub>): δ 166.7, 155.9, 149.1, 148.3, 133.4, 131.7, 131.1, 124.6, 123.6, 66.8, 38.5; IR  $\nu_{\max}$  (neat)/cm<sup>-1</sup>: 3225 (m), 3026 (w), 3006 (w), 2959 (w), 1750 (m), 1726 (s), 1460 (s), 1208 (m), 1112 (s), 960 (m), 820 (m), 790 (m); HRMS (ESI, *m/z*): calcd for C<sub>11</sub>H<sub>11</sub>O<sub>4</sub>N<sub>2</sub>ClNa<sup>+</sup> (*M* + Na<sup>+</sup>), 293.0402, found 293.0410.

### c. General Procedure for the Iron-Catalyzed Asymmetric Olefin Aminochlorination and Product Characterization

**General Procedure.** To a flame-dried sealable 2-dram vial (vial **A**) equipped with a magnetic stir bar were added Fe(NTf<sub>2</sub>)<sub>2</sub> (9.2 mg, 0.015 mmol, 15 mol %) and ligand **L5** (7.3 mg, 0.015 mmol, 15 mol %). After the vial was evacuated and backfilled with N<sub>2</sub> for three times, CHCl<sub>3</sub>

(1.0 mL, re-distilled and anhydrous) was added and the mixture was stirred at room temperature for 20 min. Meanwhile, a second flame-dried and N<sub>2</sub>-protected 2-dram vial (vial **B**) with a magnetic stir bar was charged with the substrate (0.1 mmol), anhydrous TBAC (69.5 mg, 0.25 mmol), freshly activated 4 Å molecular sieves and CHCl<sub>3</sub> (3.0 mL, re-distilled and anhydrous). Both vials were degassed by brief evacuation and back filling with N<sub>2</sub> twice. Vial **B** was cooled down to -60 °C, and the catalyst solution in vial **A** was added to vial **B** drop wise via a syringe. The resulting solution was stirred at this temperature for 12 h and then gradually warmed to room temperature. The reaction was quenched with 1 mL saturated NaHCO<sub>3</sub> solution. The reaction mixture was extracted with CH<sub>2</sub>Cl<sub>2</sub> (1.5 mL × 3), and the combined organic phase was concentrated *in vacuo*. The residue was purified through a gradient silica gel flash column chromatography (hexanes/acetone: from 15:1 to 4:1) to afford the aminochlorination product. The *dr* was determined by <sup>1</sup>H NMR analysis and the *ee* was measured by chiral HPLC analysis. The assignment of diastereomers on HPLC traces was based on <sup>1</sup>H NMR analysis.

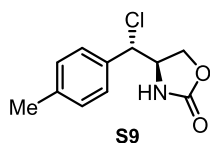

**(R)-4-((R)-chloro(*p*-tolyl)methyl)dihydrofuran-2(3H)-one (S9)** : by following the general procedure, the product **S9** was obtained as a white solid (14 mg, 65% yield, *dr*: 15:1). The *ee* was determined by chiral HPLC analysis (Chiral OD-H column, 7% EtOH in hexanes, flow rate = 0.9 mL/min, UV detection at 230 nm). The *anti*-diastereomer: *t<sub>r</sub>*(minor) = 35.1 min, *t<sub>r</sub>*(major) = 32.3 min, 91% *ee*; the *syn*-diastereomer: *t<sub>r</sub>*(minor) = 39.0 min, *t<sub>r</sub>*(major) = 36.7 min, <5% *ee*.

*Racemic sample*

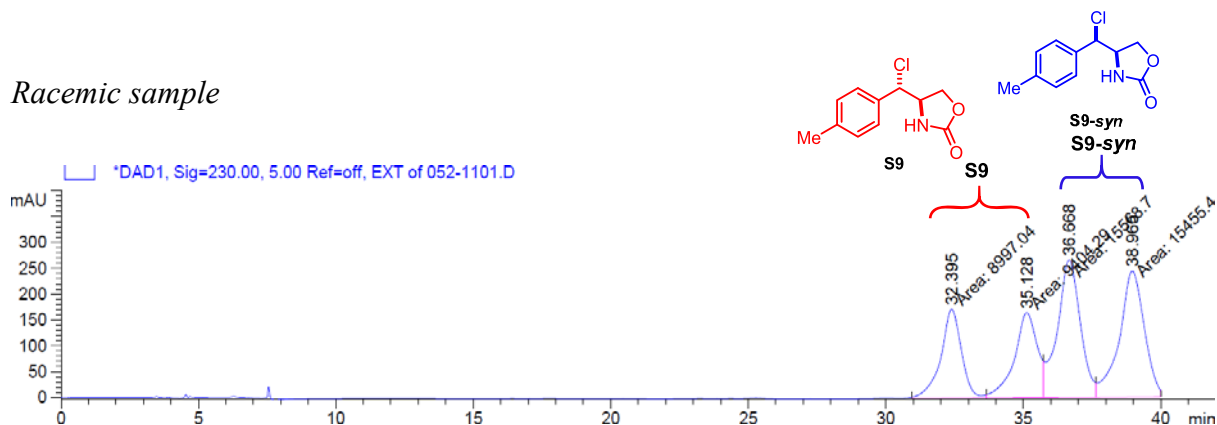



| Peak #   | RetTime [min] | Type | Width [min] | Area [mAU*s] | Height [mAU] | Area %  |
|----------|---------------|------|-------------|--------------|--------------|---------|
| 1        | 32.395        | MF   | 0.8743      | 8997.03711   | 171.50110    | 18.2033 |
| 2        | 35.128        | MF   | 0.9537      | 9404.28613   | 164.34309    | 19.0272 |
| 3        | 36.668        | MF   | 0.9768      | 1.55687e4    | 265.64551    | 31.4993 |
| 4        | 38.965        | FM   | 1.0559      | 1.54554e4    | 243.95905    | 31.2702 |
| Totals : |               |      |             | 4.94254e4    | 845.44875    |         |

*Enantio-enriched sample (91% ee)*: it was obtained by using chiral ligand **ent-L5**

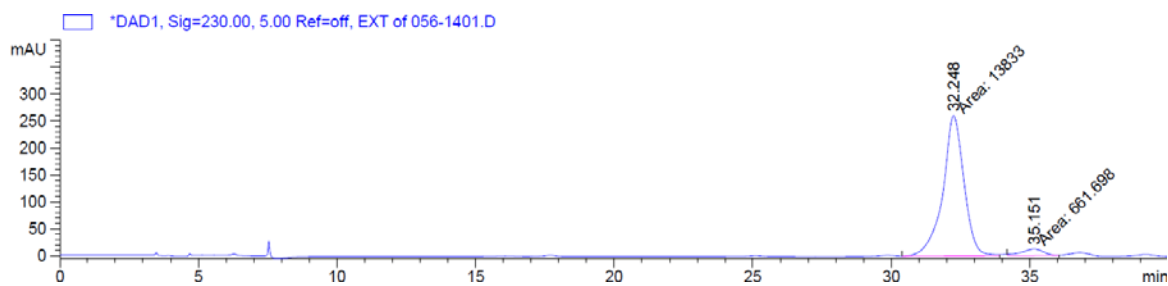

| Peak #   | RetTime [min] | Type | Width [min] | Area [mAU*s] | Height [mAU] | Area %  |
|----------|---------------|------|-------------|--------------|--------------|---------|
| 1        | 32.248        | MF   | 0.8868      | 1.38330e4    | 259.96939    | 95.4349 |
| 2        | 35.151        | FM   | 0.8816      | 661.69800    | 12.51001     | 4.5651  |
| Totals : |               |      |             | 1.44947e4    | 272.47940    |         |

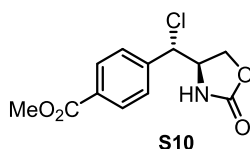

**Methyl 4-((S)-chloro((R)-2-oxooxazolidin-4-yl)methyl)benzoate (S10)**: by following the general procedure, the product **S10** was obtained as a white solid (19 mg, 69% yield, *dr*: 5.2:1). The *ee* was determined by chiral HPLC analysis (Chiral OD-H column, 10% EtOH in hexanes, flow rate = 1.0 mL/min, UV detection at 205 nm). The *anti*-diastereomer:  $t_r$  (minor) = 34.4 min,  $t_r$  (major) = 38.6 min, 86% *ee*; the *syn*-diastereomer:  $t_r$  (minor) = 42.2 min,  $t_r$  (major) = 45.1 min, <5% *ee*.

*Racemic sample*

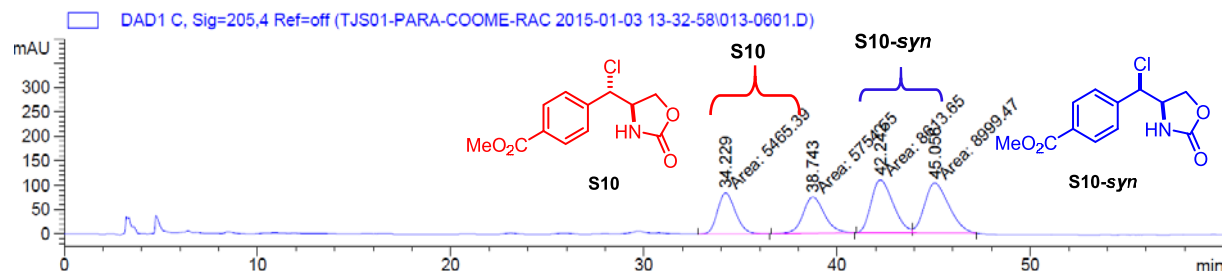

| Peak # | RetTime [min] | Type | Width [min] | Area [mAU*s] | Height [mAU] | Area %  |
|--------|---------------|------|-------------|--------------|--------------|---------|
| 1      | 34.229        | MM   | 1.0728      | 5465.39160   | 84.91122     | 18.9553 |
| 2      | 38.743        | MM   | 1.2763      | 5754.54785   | 75.14704     | 19.9582 |
| 3      | 42.242        | MF   | 1.3189      | 8613.65039   | 108.84999    | 29.8742 |
| 4      | 45.056        | FM   | 1.4569      | 8999.46875   | 102.95222    | 31.2123 |

Totals : 2.88331e4 371.86047

*Enantio-enriched sample (86% ee)*

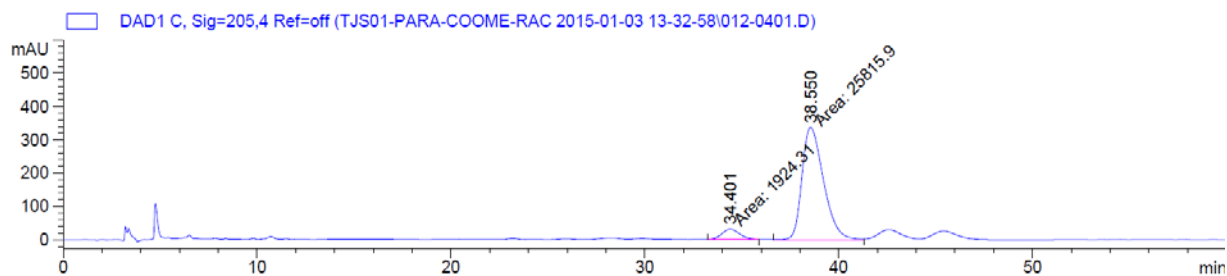

| Peak # | RetTime [min] | Type | Width [min] | Area [mAU*s] | Height [mAU] | Area %  |
|--------|---------------|------|-------------|--------------|--------------|---------|
| 1      | 34.401        | MM   | 1.0437      | 1924.31250   | 30.72984     | 6.9369  |
| 2      | 38.550        | MM   | 1.2800      | 2.58159e4    | 336.15533    | 93.0631 |

Totals : 2.77402e4 366.88517

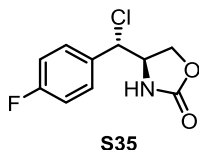

**(R)-4-((S)-chloro(4-fluorophenyl)methyl)oxazolidin-2-one (S35):** by following the general procedure, the product **S35** was obtained as a white solid (20 mg, 84% yield, *dr*: 12:1, m.p. 109–111 °C). <sup>1</sup>H NMR (400 MHz, CDCl<sub>3</sub>): δ 7.42–7.35 (m, 2H), 7.15–7.08 (m, 2H), 5.28 (s, 1H), 4.73 (d, *J* = 8.8 Hz, 1H), 4.60 (dd, *J* = 9.4, 8.2 Hz, 1H), 4.45 (dd, *J* = 9.5, 4.8 Hz, 1H), 4.24 (ddd, *J* = 8.7, 8.2, 5.3 Hz, 1H); <sup>13</sup>C NMR (100 MHz, CDCl<sub>3</sub>): δ 163.2 (d, *J* = 249.8 Hz), 158.2, 132.5 (d, *J* = 3.6 Hz), 129.6 (d, *J* = 8.5 Hz), 116.4 (d, *J* = 21.7 Hz), 68.4, 62.7, 58.3; <sup>19</sup>F NMR (376 MHz, CDCl<sub>3</sub>) δ -110.89 (td, *J* = 8.2, 4.4 Hz); IR  $\nu_{\max}$  (neat)/cm<sup>-1</sup>: 3236 (m), 3131 (w), 2929 (w), 2850 (w), 1727 (s), 1605 (m), 1510 (s), 1409 (m), 1394 (m), 1232 (s), 1023 (s), 838 (m); HRMS (ESI, *m/z*): calcd for C<sub>10</sub>H<sub>10</sub>O<sub>2</sub>NCIFH<sup>+</sup> (M + H<sup>+</sup>), 230.0379, found 230.0374; The *ee* was determined by Chiral HPLC analysis (Chiral *S*, *S*, Whelk column, 5% EtOH in hexanes, flow rate = 1.0 mL/min, UV detection at 205 nm). The *anti*-diastereomer: *t<sub>r</sub>* (minor) = 37.0 min, *t<sub>r</sub>* (major) = 39.0 min, 90% *ee*; the *syn*-diastereomer: *t<sub>r</sub>* (minor) = 41.8 min, *t<sub>r</sub>* (major) = 43.6 min, <5% *ee*.

*Racemic sample*

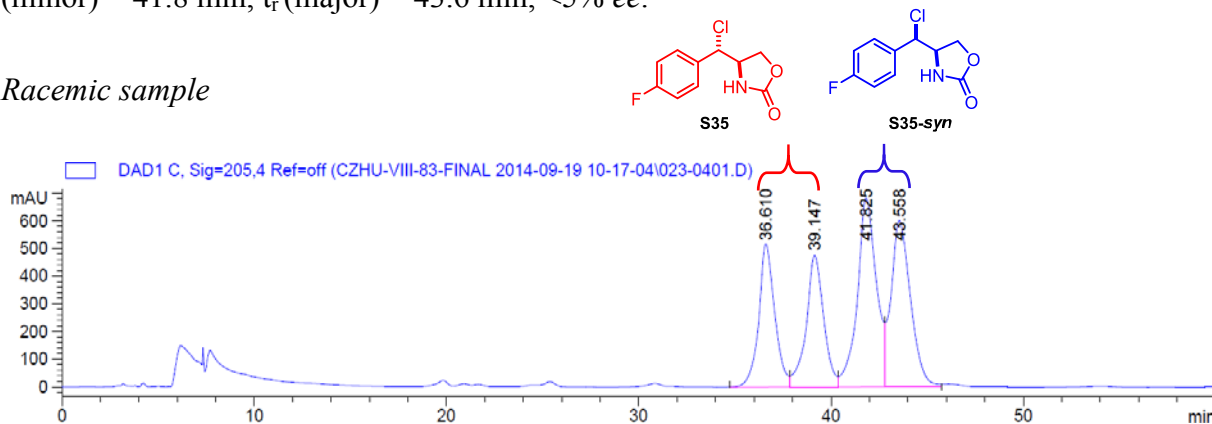

| Peak # | RetTime [min] | Type | Width [min] | Area [mAU*s] | Height [mAU] | Area %  |
|--------|---------------|------|-------------|--------------|--------------|---------|
| 1      | 36.610        | BV   | 0.8492      | 2.98748e4    | 516.22046    | 20.0044 |
| 2      | 39.147        | VV   | 0.9226      | 3.00566e4    | 474.74084    | 20.1261 |
| 3      | 41.825        | VV   | 0.9995      | 4.70431e4    | 681.33008    | 31.5004 |
| 4      | 43.558        | VB   | 1.0435      | 4.23666e4    | 600.24622    | 28.3690 |

Totals : 1.49341e5 2272.53760

Enantio-enriched sample (90% ee)

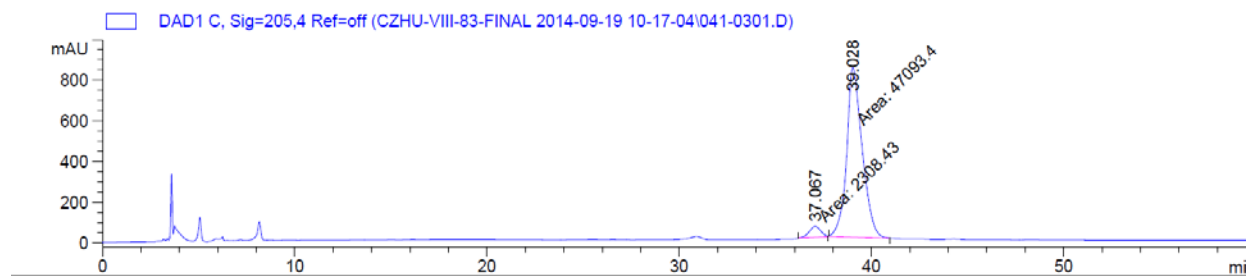

Signal 3: DAD1 C, Sig=205,4 Ref=off

| Peak # | RetTime [min] | Type | Width [min] | Area [mAU*s] | Height [mAU] | Area %  |
|--------|---------------|------|-------------|--------------|--------------|---------|
| 1      | 37.067        | MM   | 0.6858      | 2308.43481   | 56.09760     | 4.6728  |
| 2      | 39.028        | MM   | 0.9420      | 4.70934e4    | 833.26031    | 95.3272 |

Totals : 4.94018e4 889.35791

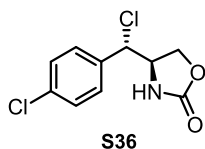

**(R)-4-((S)-chloro(4-chlorophenyl)methyl)oxazolidin-2-one (S36):** by following the general procedure, the product **S36** was obtained as a white solid (15 mg, 62% yield, *dr*: 11:1, m.p. 123–126 °C). <sup>1</sup>H NMR (400 MHz, CDCl<sub>3</sub>): δ 7.41 (d, *J* = 8.6 Hz, 2H), 7.34 (d, *J* = 8.5 Hz, 2H), 5.07 (s, 1H), 4.71 (d, *J* = 8.9 Hz, 1H), 4.61 (dd, *J* = 9.5, 8.2 Hz, 1H), 4.45 (dd, *J* = 9.5, 4.8 Hz, 1H), 4.27–4.17 (m, 1H); <sup>13</sup>C NMR (100 MHz, CDCl<sub>3</sub>): δ 158.0, 135.7, 135.0, 129.5, 129.1, 68.4, 62.6, 58.2; IR  $\nu_{\max}$  (neat)/cm<sup>-1</sup>: 3259 (m), 3012 (w), 2986 (w), 1765 (s), 1472 (m), 1239 (m), 1018 (m), 755 (m), 500 (s); HRMS (ESI, *m/z*): calcd for C<sub>10</sub>H<sub>10</sub>NO<sub>2</sub>Cl<sub>2</sub><sup>+</sup> (M + H<sup>+</sup>), 246.0089, found 246.0084. The *ee* was determined by Chiral HPLC analysis (Chiral OD-H column, 10% EtOH in hexanes, flow rate = 1.0 mL/min, UV detection at 230 nm). The *anti*-diastereomer: *t*<sub>r</sub>(minor) = 20.1 min, *t*<sub>r</sub>(major) = 18.7 min, 88% *ee*; the *syn*-diastereomer: *t*<sub>r</sub>(minor) = 26.7 min, *t*<sub>r</sub>(major) = 28.5 min, <5% *ee*.

Racemic sample

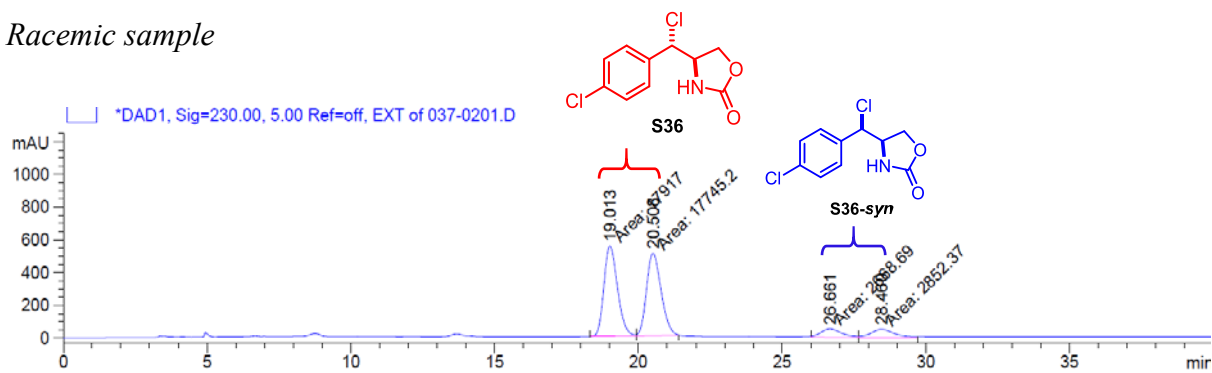

| Peak # | RetTime [min] | Type | Width [min] | Area [mAU*s] | Height [mAU] | Area %  |
|--------|---------------|------|-------------|--------------|--------------|---------|
| 1      | 19.013        | MF   | 0.5429      | 1.79170e4    | 550.01447    | 43.5055 |
| 2      | 20.508        | FM   | 0.5875      | 1.77452e4    | 503.38525    | 43.0884 |
| 3      | 26.661        | MF   | 0.8563      | 2668.69336   | 51.94394     | 6.4800  |
| 4      | 28.460        | FM   | 0.9582      | 2852.37085   | 49.61445     | 6.9260  |

Totals : 4.11833e4 1154.95811

Enantio-enriched sample (88% ee)

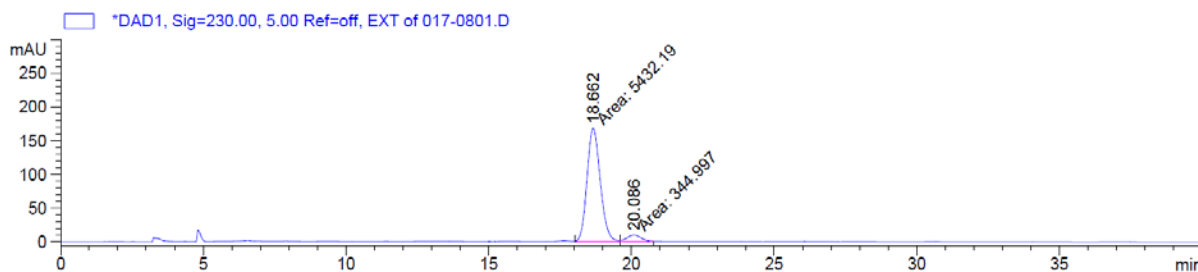

| Peak # | RetTime [min] | Type | Width [min] | Area [mAU*s] | Height [mAU] | Area %  |
|--------|---------------|------|-------------|--------------|--------------|---------|
| 1      | 18.662        | MF   | 0.5386      | 5432.18506   | 168.08821    | 94.0283 |
| 2      | 20.086        | FM   | 0.5822      | 344.99683    | 9.87630      | 5.9717  |

Totals : 5777.18188 177.96451

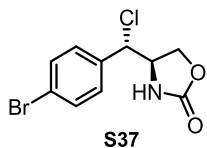

**(R)-4-((S)-chloro(4-bromophenyl)methyl)oxazolidin-2-one (S37):** by following the general procedure, the product **S37** was obtained as a white solid (21 mg, 71% yield, *dr*: 11:1, m.p. 139–141°C). <sup>1</sup>H NMR (400 MHz, CDCl<sub>3</sub>): δ 7.56 (d, *J* = 8.4 Hz, 2H), 7.27 (d, *J* = 8.4 Hz, 2H), 5.33 (s, 1H), 4.70 (d, *J* = 8.7 Hz, 1H), 4.58 (t, *J* = 8.8 Hz, 1H), 4.44 (dd, *J* = 9.4, 4.8 Hz, 1H), 4.23 (td, *J* = 8.6, 4.7 Hz, 1H); <sup>13</sup>C NMR (100 MHz, CDCl<sub>3</sub>): δ 158.2, 135.6, 132.5, 129.3, 123.8, 68.3, 62.7, 58.2; IR  $\nu_{\max}$  (neat)/cm<sup>-1</sup>: 3274 (m), 2923 (w), 2851 (w), 1757 (s), 1488 (m), 1405 (m), 1239 (m), 1010 (m); HRMS (ESI, *m/z*): calcd for C<sub>10</sub>H<sub>10</sub>O<sub>2</sub>NBrCl<sup>+</sup> (M + H<sup>+</sup>), 289.9578, found 289.9574. [ $\alpha$ ]<sub>D</sub><sup>20</sup> = + 11.4 ° (*c* 1.0, CH<sub>2</sub>Cl<sub>2</sub>). The *ee* was determined by Chiral HPLC analysis (Chiral OD-H column, 10% EtOH in hexanes, flow rate = 1.0 mL/min, UV detection at 205 nm). The *anti*-diastereomer: *t*<sub>r</sub> (minor) = 21.9 min, *t*<sub>r</sub> (major) = 19.6 min, 86% *ee*; the *syn*-diastereomer: *t*<sub>r</sub> (minor) = 26.6 min, *t*<sub>r</sub> (major) = 29.6 min, <5% *ee*.

*Racemic sample*

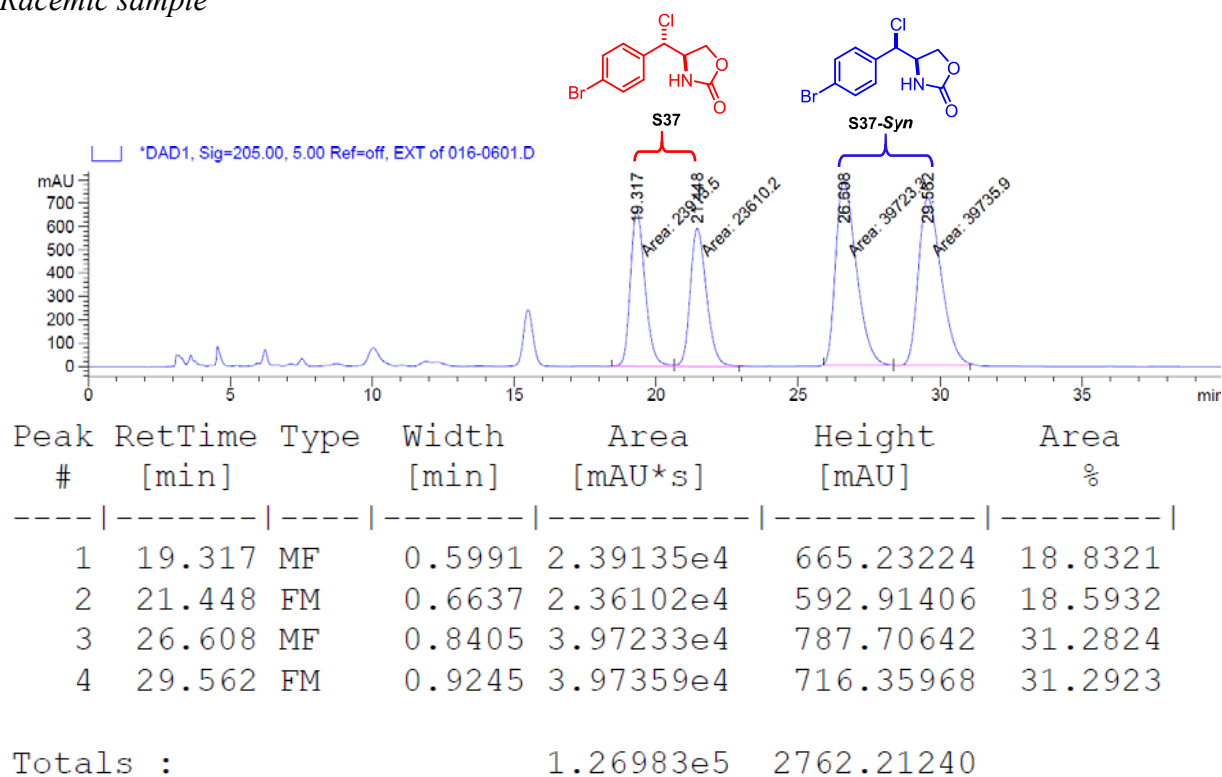

Enantio-enriched sample (86% ee)

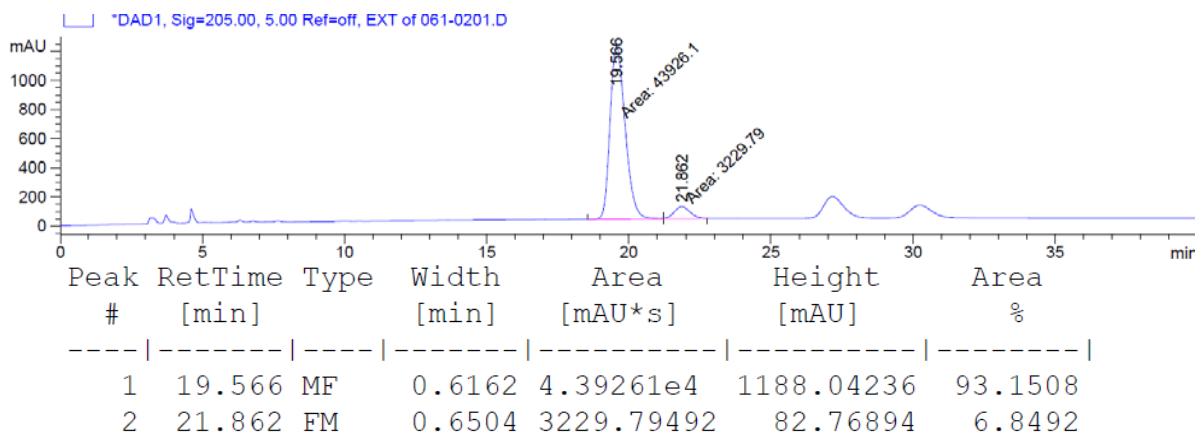

Totals : 4.71559e4 1270.81130

The absolute stereochemistry of **S37** was determined by X-ray crystallographic analysis. The crystal structure has been deposited in The Cambridge Crystallographic Data Centre as CCDC 1041826.

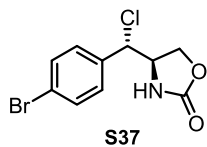

Structure Plots

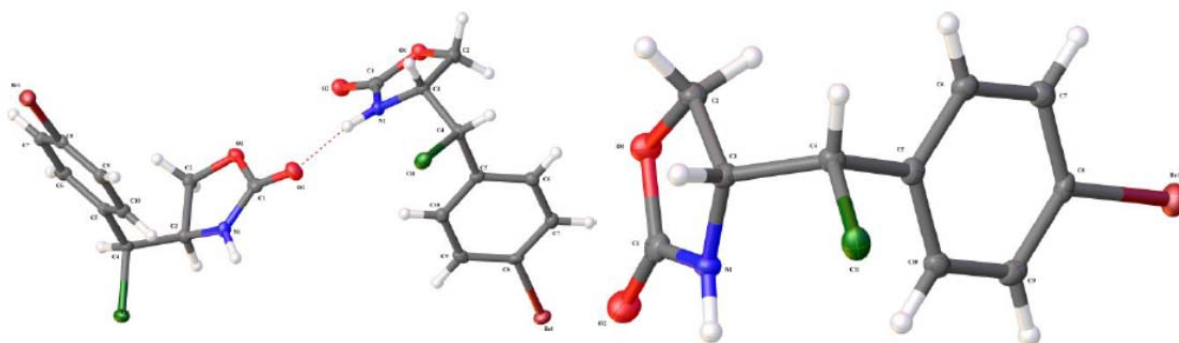

## Crystal Data and Experimental

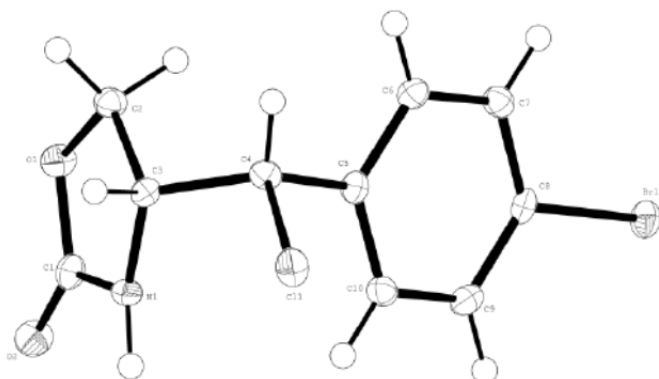

**Experimental.** Single colorless prism-shaped crystals of (**czhu-para-br-acl**) were recrystallised from DCM by slow evaporation. A suitable crystal ( $0.32 \times 0.20 \times 0.14 \text{ mm}^3$ ) was selected and mounted on a loop with paratone oil on a Bruker APEX-II CCD diffractometer. The crystal was cooled to  $T = 110(2) \text{ K}$  during data collection. The structure was solved with the **ShelXD** (Sheldrick, 2008) structure solution program using **Olex2** (Dolomanov et al., 2009), using the Dual Space solution method. The structure was refined with version 2013-4 of **ShelXL-97** (Sheldrick, 2008) using Least Squares minimisation.

**Crystal Data.**  $\text{C}_{10}\text{H}_9\text{BrClNO}_2$ ,  $M_r = 290.54$ , monoclinic,  $P2_1$  (No. 4),  $a = 5.9280(4) \text{ \AA}$ ,  $b = 7.6682(5) \text{ \AA}$ ,  $c = 11.3533(8) \text{ \AA}$ ,  $\beta = 95.944(3)^\circ$ ,  $\alpha = \gamma = 90^\circ$ ,  $V = 513.31(6) \text{ \AA}^3$ ,  $T = 110(2) \text{ K}$ ,  $Z = 2$ ,  $Z' = 1$ ,  $\mu (\text{MoK}\alpha) = 4.240$ , 5260 reflections measured, 2561 unique ( $R_{int} = 0.0271$ ) which were used in all calculations. The final  $wR_2$  was 0.0544 (all data) and  $R_1$  was 0.0264 ( $I > 2(I)$ ).

| Compound                       | czhu-para-br-acl                         |
|--------------------------------|------------------------------------------|
| Formula                        | $\text{C}_{10}\text{H}_9\text{BrClNO}_2$ |
| $D_{calc.} / \text{g cm}^{-3}$ | 1.880                                    |
| $\mu / \text{mm}^{-1}$         | 4.240                                    |
| Formula Weight                 | 290.54                                   |
| Colour                         | colourless                               |
| Shape                          | prism                                    |
| Max Size/mm                    | 0.32                                     |
| Mid Size/mm                    | 0.20                                     |
| Min Size/mm                    | 0.14                                     |
| $T/\text{K}$                   | 110(2)                                   |
| Crystal System                 | monoclinic                               |
| Space Group                    | $P2_1$                                   |
| $a/\text{\AA}$                 | 5.9280(4)                                |
| $b/\text{\AA}$                 | 7.6682(5)                                |
| $c/\text{\AA}$                 | 11.3533(8)                               |
| $\alpha/^\circ$                | 90                                       |
| $\beta/^\circ$                 | 95.944(3)                                |
| $\gamma/^\circ$                | 90                                       |
| $V/\text{\AA}^3$               | 513.31(6)                                |
| $Z$                            | 2                                        |
| $Z'$                           | 1                                        |
| $\theta_{min}/^\circ$          | 3.211                                    |
| $\theta_{max}/^\circ$          | 28.700                                   |
| Measured Refl.                 | 5260                                     |
| Independent Refl.              | 2561                                     |
| Reflections Used               | 2404                                     |
| $R_{int}$                      | 0.0271                                   |
| Parameters                     | 144                                      |
| Restraints                     | 2                                        |
| Largest Peak                   | 0.587                                    |
| Deepest Hole                   | -0.370                                   |
| GooF                           | 0.986                                    |
| $wR_2$ (all data)              | 0.0544                                   |
| $wR_2$                         | 0.0540                                   |
| $R_1$ (all data)               | 0.0283                                   |
| $R_1$                          | 0.0264                                   |



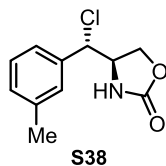

**(R)-4-((S)-chloro(m-tolyl)methyl)oxazolidin-2-one (S38):** by following the general procedure, the product **S38** was obtained as a white solid (17 mg, 75% yield, *dr*: 12:1, m.p.126–129 °C). <sup>1</sup>H NMR (400 MHz, CDCl<sub>3</sub>): δ 7.33–7.29 (m, 1H), 7.21–7.17 (m, 3H), 4.83 (s, 1H), 4.67 (d, *J* = 9.3 Hz, 1H), 4.62 (dd, *J* = 9.3, 8.3 Hz, 1H), 4.48 (dd, *J* = 9.4, 4.8 Hz, 1H), 4.26 (td, *J* = 8.4, 4.8 Hz, 1H), 2.38 (s, 3H); <sup>13</sup>C NMR (100 MHz, CDCl<sub>3</sub>): δ 158.3, 139.2, 136.5, 130.4, 129.2, 128.3, 124.7, 68.5, 63.6, 58.2, 21.4; IR  $\nu_{\max}$  (neat)/cm<sup>-1</sup>: 3270 (m), 3144 (w), 3041 (w), 2928 (w), 2341 (w), 1752 (s), 1402 (m), 1276 (m), 1239 (m), 1028 (m), 760 (m); HRMS (ESI, *m/z*): calcd for C<sub>11</sub>H<sub>13</sub>NO<sub>2</sub>Cl<sup>+</sup> (*M* + H<sup>+</sup>), 226.0635, found 226.0640. The *ee* was determined by Chiral HPLC analysis (Chiral *S, S*, Whelk column, 5% EtOH in hexanes, flow rate = 1.0 mL/min, UV detection at 205 nm). The *anti*-diastereomer: *t<sub>r</sub>* (minor) = 18.0 min, *t<sub>r</sub>* (major) = 15.4 min, 87% *ee*; the *syn*-diastereomer: *t<sub>r</sub>* (minor) = 19.8 min, *t<sub>r</sub>* (major) = 22.5 min, <5% *ee*.

*Racemic sample*

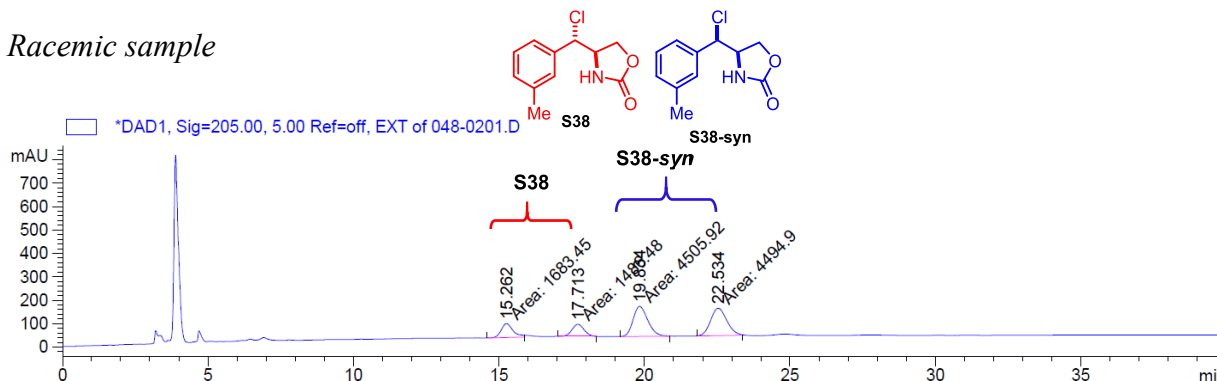

| Peak # | RetTime [min] | Type | Width [min] | Area [mAU*s] | Height [mAU] | Area %  |
|--------|---------------|------|-------------|--------------|--------------|---------|
| 1      | 15.262        | MF   | 0.4749      | 1683.45300   | 59.07664     | 13.8320 |
| 2      | 17.713        | MM   | 0.4815      | 1486.47937   | 51.45514     | 12.2135 |
| 3      | 19.834        | MM   | 0.5866      | 4505.92090   | 128.02838    | 37.0225 |
| 4      | 22.534        | MM   | 0.6419      | 4494.89893   | 116.70497    | 36.9320 |

Totals : 1.21708e4 355.26514

Enantio-enriched sample (87% ee): it was obtained by using *ent*-L5 ligand.

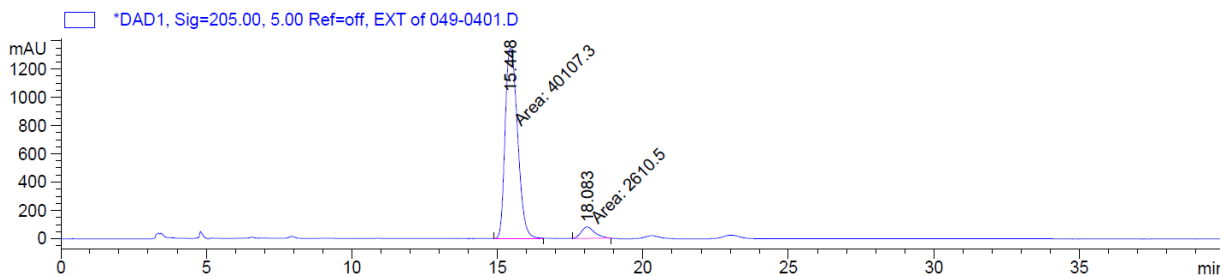

| Peak # | RetTime [min] | Type | Width [min] | Area [mAU*s] | Height [mAU] | Area %  |
|--------|---------------|------|-------------|--------------|--------------|---------|
| 1      | 15.448        | MM   | 0.4958      | 4.01073e4    | 1348.12842   | 93.8890 |
| 2      | 18.083        | MM   | 0.5387      | 2610.50269   | 80.75871     | 6.1110  |

Totals : 4.27178e4 1428.88713

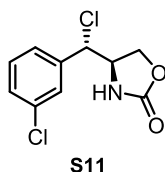

**(R)-4-((S)-chloro(3-chlorophenyl)methyl)oxazolidin-2-one (S11)**: by following the general procedure, the product **S11** was obtained as a white solid (16 mg, 63% yield, *dr*: 10:1). The *ee* was determined by Chiral HPLC analysis (Chiral OD-H column, 10% EtOH in hexanes, flow rate = 1.0 mL/min, UV detection at 205 nm). The *anti*-diastereomer:  $t_r$  (minor) = 24.2min,  $t_r$  (major) = 20.4 min, 80% *ee*; the *syn*-diastereomer:  $t_r$  (minor) = 25.2 min,  $t_r$  (major) = 35.2 min, <5% *ee*.

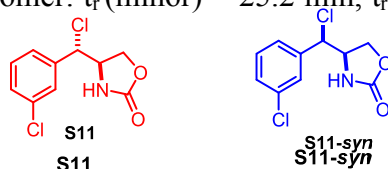

Racemic sample

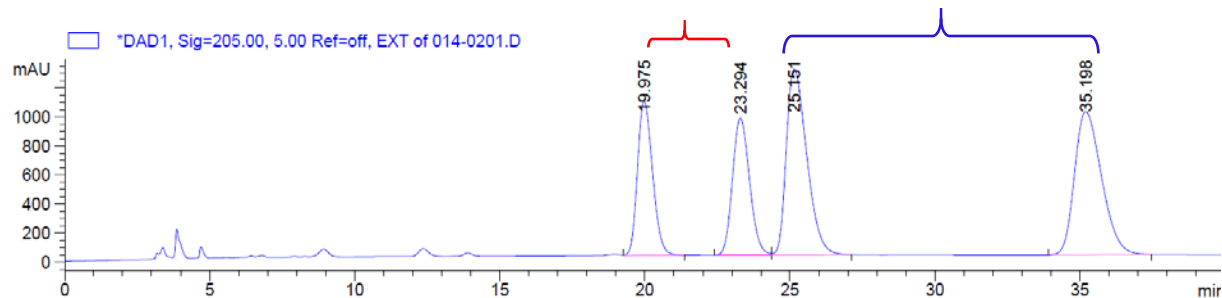

| Peak # | RetTime [min] | Type | Width [min] | Area [mAU*s] | Height [mAU] | Area %  |
|--------|---------------|------|-------------|--------------|--------------|---------|
| 1      | 19.975        | VB   | 0.5620      | 3.82381e4    | 1062.09363   | 18.8698 |
| 2      | 23.294        | BV   | 0.6381      | 3.84101e4    | 941.26605    | 18.9548 |
| 3      | 25.151        | VB   | 0.7544      | 6.23812e4    | 1275.87036   | 30.7841 |
| 4      | 35.198        | BB   | 0.9952      | 6.36118e4    | 985.25012    | 31.3913 |

Totals : 2.02641e5 4264.48016

Enantio-enriched sample (80% ee): it was obtained by using *ent*-L5 ligand.

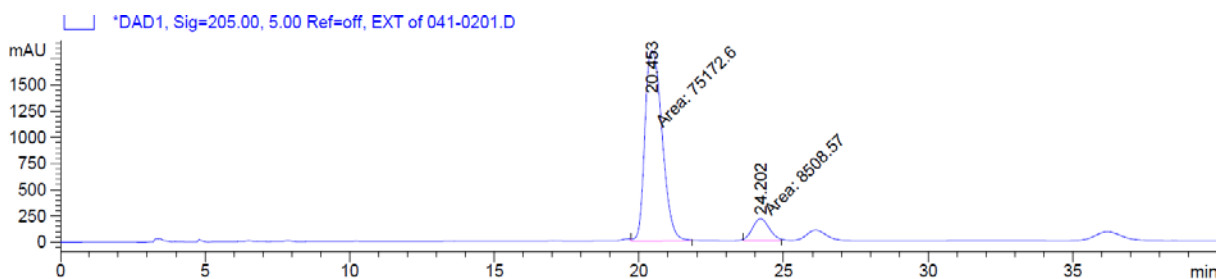

| Peak # | RetTime [min] | Type | Width [min] | Area [mAU*s] | Height [mAU] | Area %  |
|--------|---------------|------|-------------|--------------|--------------|---------|
| 1      | 20.453        | MF   | 0.6884      | 7.51726e4    | 1820.07776   | 89.8322 |
| 2      | 24.202        | MF   | 0.6768      | 8508.57422   | 209.52779    | 10.1678 |

Totals : 8.36812e4 2029.60555

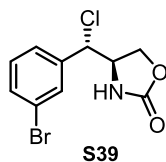

**(R)-4-((S)-chloro(3-bromophenyl)methyl)oxazolidin-2-one (S39)**: by following the general procedure under the condition described in entry 8, the product **S39** was obtained as a white solid (21 mg, 71% yield, *dr*: 15:1, m.p. 113–115 °C). <sup>1</sup>H NMR (400 MHz, CDCl<sub>3</sub>): δ 7.58–7.51 (m, 2H), 7.34–7.28 (m, 1H), 7.32 (s, 1H), 5.05 (s, 1H), 4.67 (d, *J* = 9.1 Hz, 1H), 4.62 (dd, *J* = 9.5, 8.2

Hz, 1H), 4.47 (dd,  $J = 9.5, 4.7$  Hz, 1H), 4.24 (ddd,  $J = 8.7, 8.1, 4.7$  Hz, 1H) ;  $^{13}\text{C}$  NMR (100 MHz,  $\text{CDCl}_3$ ):  $\delta$  158.0, 138.8, 132.9, 130.8, 130.7, 126.4, 123.3, 68.4, 62.4, 58.2; IR  $\nu_{\text{max}}$  (neat)/ $\text{cm}^{-1}$ : 3272 (m), 2923 (w), 2952 (w), 1747 (s), 1476 (m), 1428 (m), 1237(m), 1025(m), 732 (m); HRMS (ESI,  $m/z$ ): calcd for  $\text{C}_{10}\text{H}_{10}\text{O}_2\text{NBrCl}^+$  ( $\text{M} + \text{H}^+$ ), 289.9578, found 289.9573. The *ee* was determined by Chiral HPLC analysis (Chiral OD-H column, 10% EtOH in hexanes, flow rate = 1.0 mL/min, UV detection at 205 nm). The *anti*-diastereomer:  $t_r$  (minor) = 21.9 min,  $t_r$  (major) = 25.6 min, 80% *ee*; the *syn*-diastereomer:  $t_r$  (minor) = 26.9 min,  $t_r$  (major) = 39.5 min, <5% *ee*.

### Racemic sample

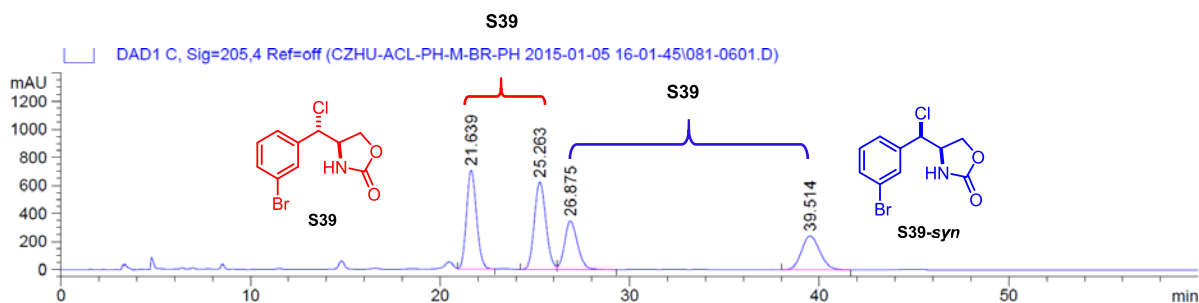

| Peak # | RetTime [min] | Type | Width [min] | Area [mAU*s] | Height [mAU] | Area %  |
|--------|---------------|------|-------------|--------------|--------------|---------|
| 1      | 21.639        | VB   | 0.5793      | 2.59986e4    | 703.30060    | 30.6557 |
| 2      | 25.263        | BV   | 0.6620      | 2.63187e4    | 621.50104    | 31.0332 |
| 3      | 26.875        | VB   | 0.7283      | 1.63597e4    | 344.31677    | 19.2903 |
| 4      | 39.514        | BB   | 1.0267      | 1.61312e4    | 240.46060    | 19.0208 |

Totals : 8.48081e4 1909.57901

*Enantio-enriched sample* (80% *ee*) it was obtained by using *ent-L5* ligand.

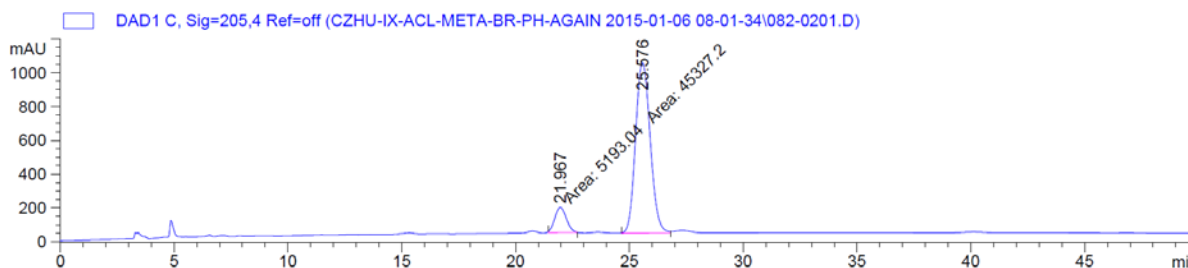

| Peak # | RetTime [min] | Type | Width [min] | Area [mAU*s] | Height [mAU] | Area %  |
|--------|---------------|------|-------------|--------------|--------------|---------|
| 1      | 21.967        | MM   | 0.5812      | 5193.03906   | 148.92203    | 10.2791 |
| 2      | 25.576        | MM   | 0.7473      | 4.53272e4    | 1010.88354   | 89.7209 |

Totals : 5.05203e4 1159.80557

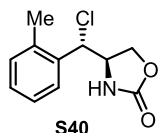

**(R)-4-((S)-chloro(o-tolyl)methyl)oxazolidin-2-one (S40):** by following the general procedure under the condition described in entry 8, the product **S40** was obtained as a white solid (18 mg, 78% yield, *dr*: 4.5:1, m.p.114–116 °C). <sup>1</sup>H NMR (400 MHz, CDCl<sub>3</sub>): δ 7.32–7.28 (m, 1H), 7.21–7.17 (m, 3H), 7.23–7.20 (m, 1H), 5.01 (s, 1H), 4.68 (d, *J* = 9.2 Hz, 1H), 4.61 (dd, *J* = 9.4, 8.2 Hz, 1H), 4.48 (dd, *J* = 9.4, 4.8 Hz, 1H), 4.29–4.23(m, 1H), 2.38 (s, 3H); <sup>13</sup>C NMR (100 MHz, CDCl<sub>3</sub>): δ 158.4, 136.7, 131.3, 129.4, 127.2, 126.6, 68.8, 59.1, 57.5, 19.4; IR  $\nu_{\max}$  (neat)/cm<sup>-1</sup>: 3269 (m), 3144 (w), 3035 (w), 2922 (w), 2340 (w), 1750 (s), 1410 (m), 1276 (m), 1235 (m), 1021 (m), 765 (m); HRMS (ESI, *m/z*): calcd for C<sub>11</sub>H<sub>13</sub>NO<sub>2</sub>Cl<sup>+</sup> (M + H<sup>+</sup>), 226.0635, found 226.0640. The *ee* was determined by Chiral HPLC analysis (Chiral *S, S*, Welk column, 5% EtOH in hexanes, flow rate = 1.0 mL/min, UV detection at 205 nm). The *anti*-diastereomer: *t<sub>r</sub>* (minor) = 37.8 min, *t<sub>r</sub>* (major) = 34.9 min, 77% *ee*; the *syn*-diastereomer: *t<sub>r</sub>* (minor) = 47.3 min, *t<sub>r</sub>* (major) = 52.5 min, <5% *ee*.

*Racemic sample*

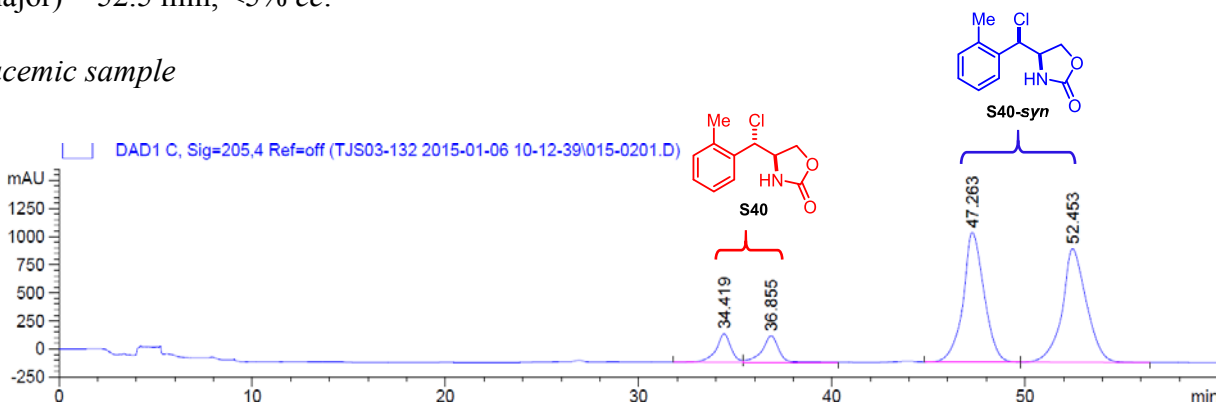

| Peak #   | RetTime [min] | Type | Width [min] | Area [mAU*s] | Height [mAU] | Area %  |
|----------|---------------|------|-------------|--------------|--------------|---------|
| 1        | 34.419        | BV   | 0.7849      | 1.35278e4    | 252.55251    | 6.6802  |
| 2        | 36.855        | VB   | 0.8558      | 1.39221e4    | 236.16118    | 6.8750  |
| 3        | 47.263        | BB   | 1.0879      | 8.70846e4    | 1154.61365   | 43.0037 |
| 4        | 52.453        | BB   | 1.2384      | 8.79705e4    | 1011.78650   | 43.4411 |
| Totals : |               |      |             | 2.02505e5    | 2655.11383   |         |

*Enantio-enriched sample (77 % ee)*: it was obtained by using *ent-L5* ligand.

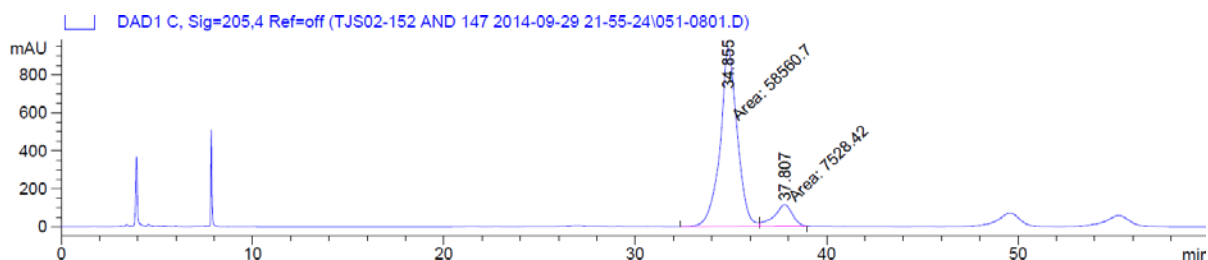

| Peak #   | RetTime [min] | Type | Width [min] | Area [mAU*s] | Height [mAU] | Area %  |
|----------|---------------|------|-------------|--------------|--------------|---------|
| 1        | 34.855        | MF   | 1.0397      | 5.85607e4    | 938.72003    | 88.6087 |
| 2        | 37.807        | FM   | 1.1122      | 7528.41846   | 112.82027    | 11.3913 |
| Totals : |               |      |             | 6.60891e4    | 1051.54031   |         |

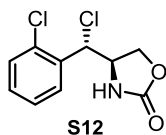

**(R)-4-((S)-chloro(2-chlorophenyl)methyl)oxazolidin-2-one (S12)**: by following the general procedure, the product **S1** was obtained as a white solid (14 mg, 55% yield, *dr*: 12:1). The *ee* was determined by Chiral HPLC analysis (Chiral OD-H column, 10% EtOH in hexanes, flow rate = 1.0 mL/min, UV detection at 225 nm). The *anti*-diastereomer:  $t_r$  (minor) = 19.2 min,  $t_r$  (major) = 17.1 min, 79% *ee*; the *syn*-diastereomer:  $t_r$  (minor) = 23.3 min,  $t_r$  (major) = 24.4 min, <5% *ee*.

Racemic sample

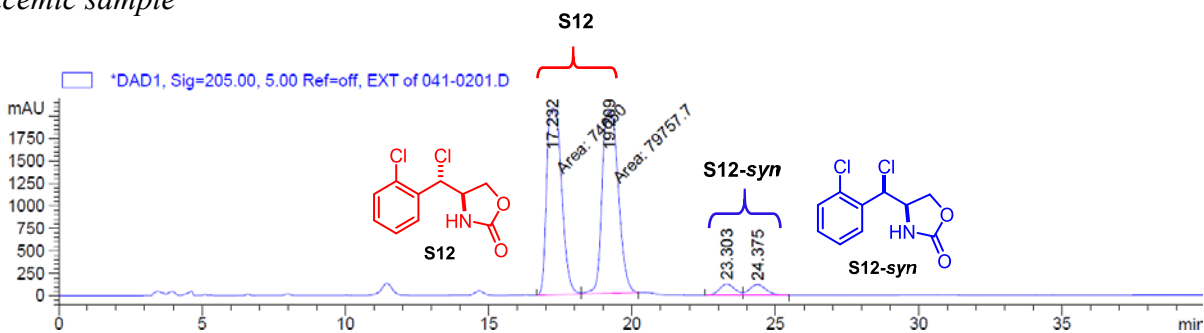

| Peak # | RetTime [min] | Type | Width [min] | Area [mAU*s] | Height [mAU] | Area %  |
|--------|---------------|------|-------------|--------------|--------------|---------|
| 1      | 17.232        | MF   | 0.6003      | 7.46500e4    | 2072.44897   | 45.7309 |
| 2      | 19.209        | FM   | 0.6564      | 7.97577e4    | 2024.98523   | 48.8600 |
| 3      | 23.303        | BV   | 0.5579      | 4340.15088   | 119.44707    | 2.6588  |
| 4      | 24.375        | VB   | 0.5964      | 4489.55664   | 114.25739    | 2.7503  |

Totals : 1.63237e5 4331.13866

Enantio-enriched sample (79% ee): it was obtained by using *ent*-L5 ligand.

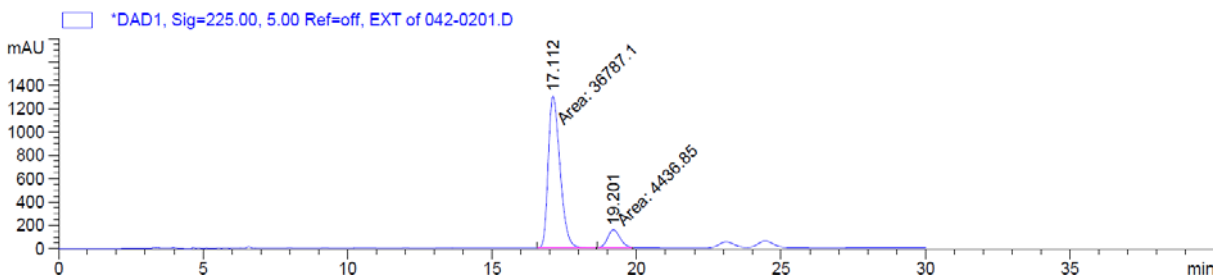

| Peak # | RetTime [min] | Type | Width [min] | Area [mAU*s] | Height [mAU] | Area %  |
|--------|---------------|------|-------------|--------------|--------------|---------|
| 1      | 17.112        | MM   | 0.4713      | 3.67871e4    | 1301.02917   | 89.2372 |
| 2      | 19.201        | MM   | 0.4896      | 4436.85156   | 151.04352    | 10.7628 |

Totals : 4.12240e4 1452.07269

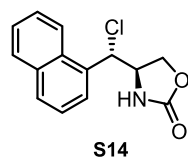

**(R)-4-((S)-chloro(naphthalen-1-yl)methyl)oxazolidin-2-one (S14)**: by following the general procedure, the product **S14** was obtained as a white solid (17 mg, 63% yield, *dr*: 10:1). The *ee* was determined by Chiral HPLC analysis (Chiral *S, S*, column, 10% EtOH in hexanes, flow rate = 1.0 mL/min, UV detection at 205 nm). The *anti*-diastereomer:  $t_r$  (minor) = 36.8 min,  $t_r$  (major) = 33.1 min, 92% *ee*; the *syn*-diastereomer:  $t_r$  (minor) = 41.5 min,  $t_r$  (major) = 40.5 min, 26% *ee*.

*Racemic sample*

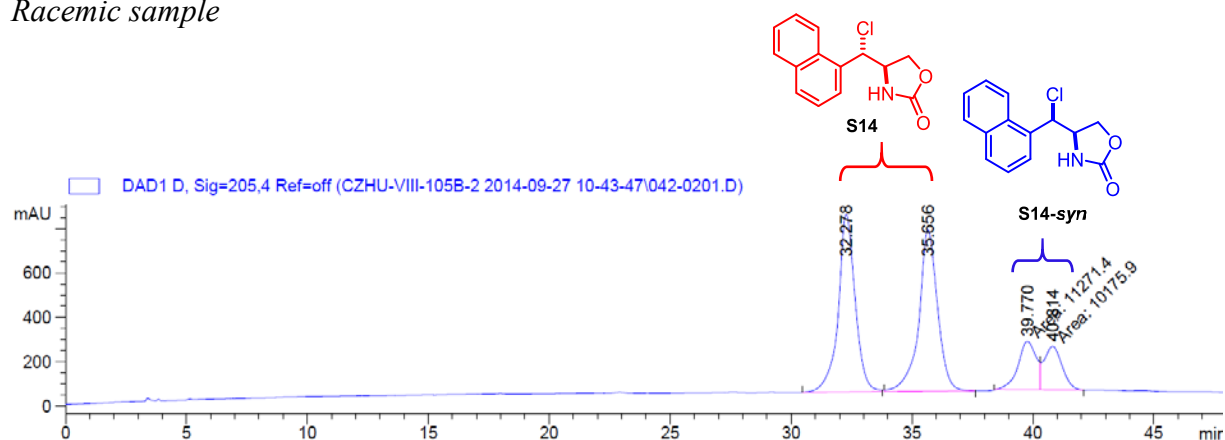

| Peak # | RetTime [min] | Type | Width [min] | Area [mAU*s] | Height [mAU] | Area %  |
|--------|---------------|------|-------------|--------------|--------------|---------|
| 1      | 32.278        | BB   | 0.7245      | 3.91964e4    | 801.58344    | 39.2017 |
| 2      | 35.656        | BB   | 0.7933      | 3.93426e4    | 729.40009    | 39.3480 |
| 3      | 39.770        | MF   | 0.8633      | 1.12714e4    | 217.60928    | 11.2730 |
| 4      | 40.814        | FM   | 0.8658      | 1.01759e4    | 195.89568    | 10.1773 |

Totals :                                    9.99863e4    1944.48848



Enantio-enriched sample (92% ee)

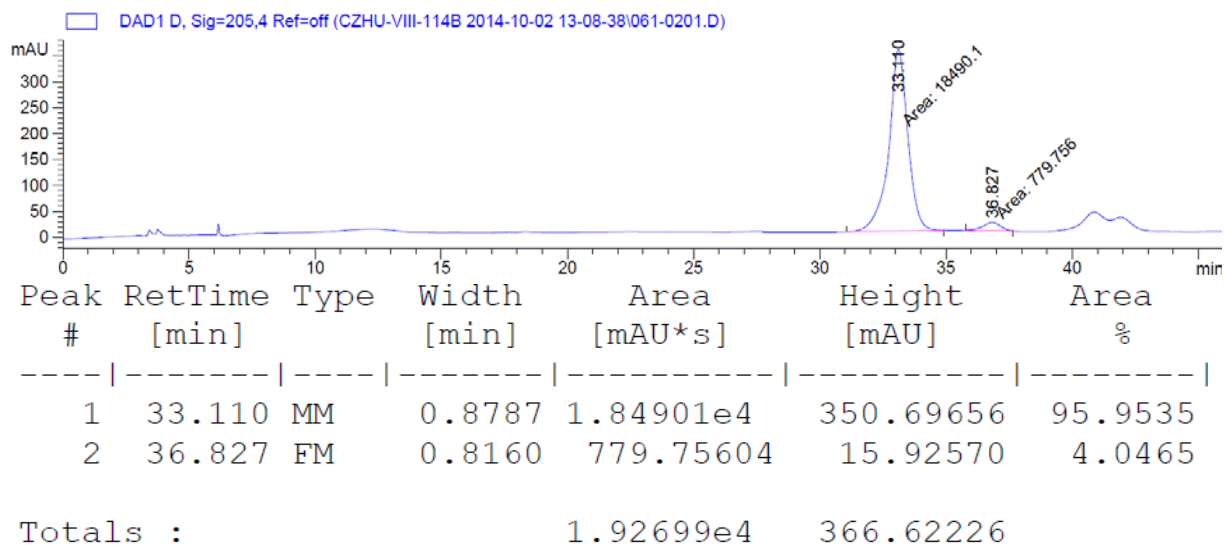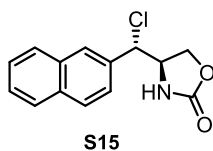

**(R)-4-((S)-chloro(naphthalen-2-yl)methyl)oxazolidin-2-one (S15)**: by following the general procedure under the condition described in entry 8, the product **S15** was obtained as a white solid (14 mg, 53% yield, *dr*: 4.5:1). The *ee* was determined by Chiral HPLC analysis (Chiral OD-H column, 15% EtOH in hexanes, flow rate = 1.0 mL/min, UV detection at 225 nm). The *anti*-diastereomer:  $t_r$  (minor) = 21.7 min,  $t_r$  (major) = 24.8 min, 89% *ee*; the *syn*-diastereomer:  $t_r$  (minor) = 28.5 min,  $t_r$  (major) = 32.0 min, <5% *ee*.

Racemic sample

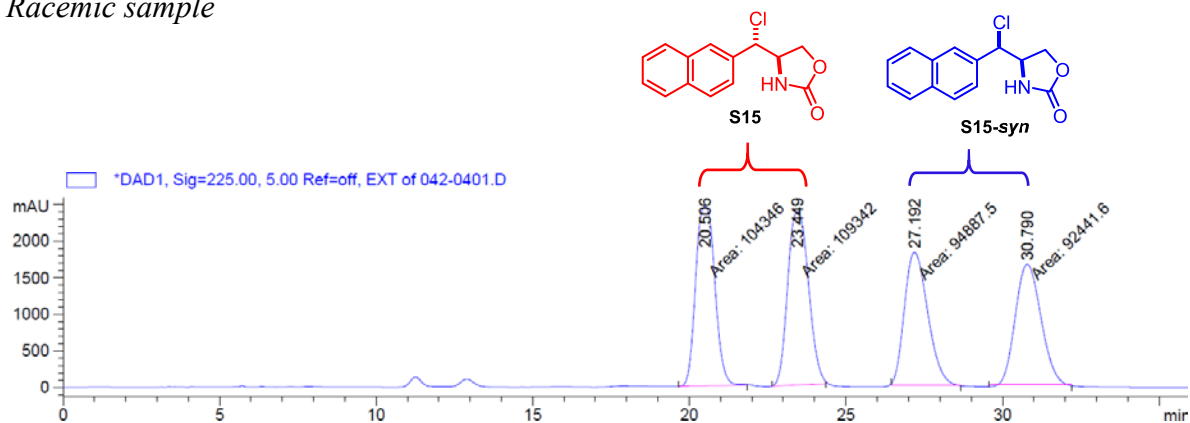

| Peak # | RetTime [min] | Type | Width [min] | Area [mAU*s] | Height [mAU] | Area %  |
|--------|---------------|------|-------------|--------------|--------------|---------|
| 1      | 20.506        | MM   | 0.7091      | 1.04346e5    | 2452.68799   | 26.0204 |
| 2      | 23.449        | MM   | 0.7675      | 1.09342e5    | 2374.41357   | 27.2661 |
| 3      | 27.192        | MM   | 0.8668      | 9.48875e4    | 1824.49622   | 23.6617 |
| 4      | 30.790        | MM   | 0.9385      | 9.24416e4    | 1641.62427   | 23.0518 |

Totals : 4.01017e5 8293.22205

Enantio-enriched sample (89% ee): it was obtained by using *ent-L5* ligand.

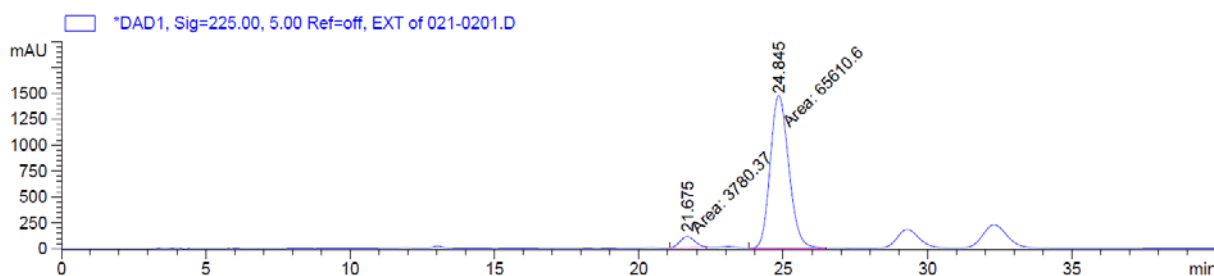

| Peak # | RetTime [min] | Type | Width [min] | Area [mAU*s] | Height [mAU] | Area %  |
|--------|---------------|------|-------------|--------------|--------------|---------|
| 1      | 21.675        | MM   | 0.5975      | 3780.36719   | 105.45399    | 5.4479  |
| 2      | 24.845        | MF   | 0.7444      | 6.56106e4    | 1468.95325   | 94.5521 |

Totals : 6.93910e4 1574.40724

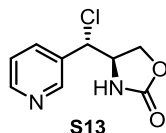

**(R)-4-((S)-chloro(pyridin-3-yl)methyl)oxazolidin-2-one (S13)**: by following the general procedure, the product **S13** and its diastereomer were obtained as a white solid (11 mg, 51% yield, *dr*: 1.8:1). Its *syn*-diastereomer:  $^1\text{H}$  NMR (400 MHz,  $\text{CDCl}_3$ )  $\delta$  8.62 (d,  $J = 22.0$  Hz, 2H), 7.74 (d,  $J = 8.0$  Hz, 1H), 7.35 (t,  $J = 6.2$  Hz, 1H), 6.04 (s, 1H), 4.88 (d,  $J = 7.6$  Hz, 1H), 4.38 (td,  $J = 8.4, 4.2$  Hz, 1H), 4.31 (dd,  $J = 8.4, 8.4$  Hz, 1H), 4.06 (dd,  $J = 8.6, 4.0$  Hz, 1H).  $^{13}\text{C}$  NMR (100 MHz,  $\text{CDCl}_3$ )  $\delta$  158.3, 150.9, 148.8, 135.3, 132.6, 124.1, 66.7, 62.1, 58.5. The *ee* was determined by Chiral HPLC analysis (Chiral AS-H column, 25% EtOH in hexanes, flow rate = 1.0 mL/min, UV detection at 205 nm). The *anti*-diastereomer:  $t_r$ (minor) = 42.6 min,  $t_r$ (major) = 34.0 min, 70% *ee*; the *syn*-diastereomer:  $t_r$ (minor) = 23.1 min,  $t_r$ (major) = 25.9 min, <5% *ee*.

#### Racemic sample

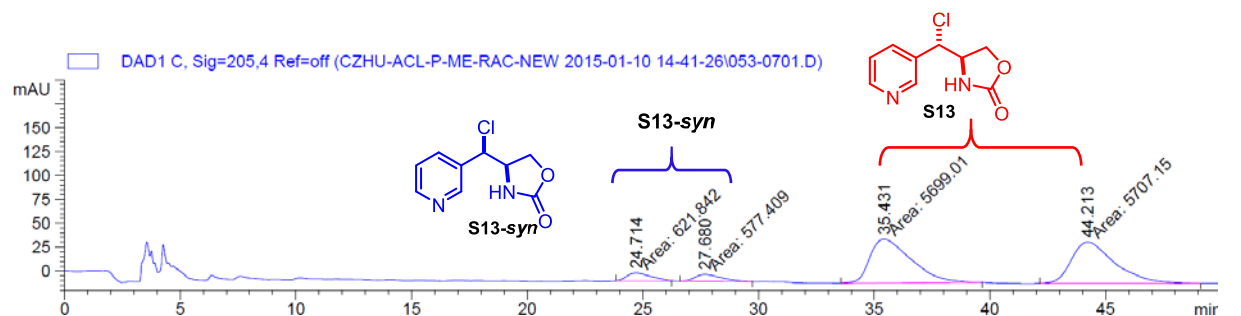

| Peak # | RetTime [min] | Type | Width [min] | Area [mAU*s] | Height [mAU] | Area %  |
|--------|---------------|------|-------------|--------------|--------------|---------|
| 1      | 24.714        | MM   | 1.2220      | 621.84192    | 8.48125      | 4.9331  |
| 2      | 27.680        | MM   | 1.3079      | 577.40948    | 7.35821      | 4.5806  |
| 3      | 35.431        | MM   | 2.0750      | 5699.00635   | 45.77486     | 45.2108 |
| 4      | 44.213        | MM   | 2.1854      | 5707.15283   | 43.52435     | 45.2754 |

Totals : 1.26054e4 105.13867

*Enantio-enriched sample (70% ee)*: it was obtained by using *ent-L5* ligand.

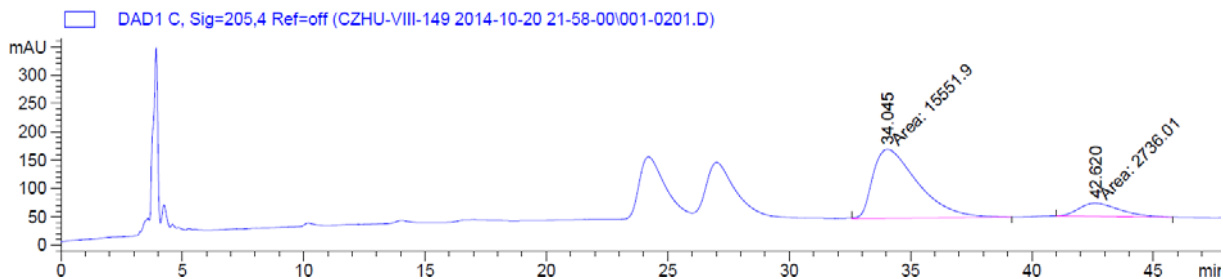

| Peak # | RetTime [min] | Type | Width [min] | Area [mAU*s] | Height [mAU] | Area %  |
|--------|---------------|------|-------------|--------------|--------------|---------|
| 1      | 34.045        | FM   | 2.1449      | 1.55519e4    | 120.84544    | 85.0392 |
| 2      | 42.620        | MM   | 1.9542      | 2736.00684   | 23.33451     | 14.9608 |

Totals : 1.82879e4 144.17995

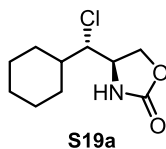

**(R)-4-((S)-chloro(o-tolyl)methyl)oxazolidin-2-one (S19a)**: by following the general procedure, the product **S19a** and its diastereomer were obtained as a white solid (18 mg, 78% yield, *dr*: 2.0:1). The *ee* was determined by Chiral HPLC analysis after benzylation (Chiral OD-H column, 10% isopropanol in hexanes, flow rate = 1.0 mL/min, UV detection at 254 nm). The *anti*-diastereomer:  $t_r$ (minor) = 26.7 min,  $t_r$ (major) = 24.9 min, 54% *ee*.

Racemic sample of the **S19c**

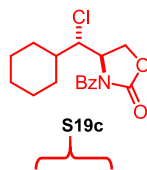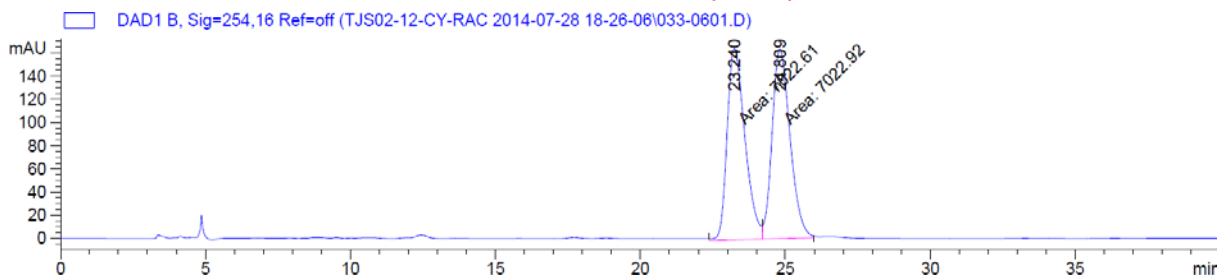

| Peak # | RetTime [min] | Type | Width [min] | Area [mAU*s] | Height [mAU] | Area %  |
|--------|---------------|------|-------------|--------------|--------------|---------|
| 1      | 23.240        | MF   | 0.7101      | 7022.60693   | 164.81929    | 49.9989 |
| 2      | 24.809        | FM   | 0.7173      | 7022.91943   | 163.17218    | 50.0011 |

Totals : 1.40455e4 327.99147

Enantio-enriched sample of **S19c** (54% ee)

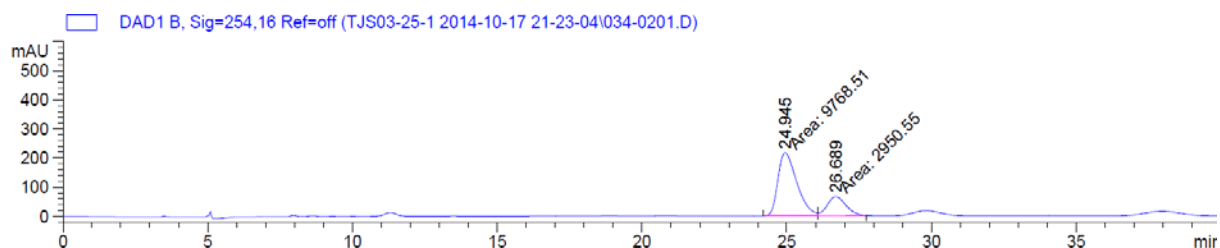

| Peak # | RetTime [min] | Type | Width [min] | Area [mAU*s] | Height [mAU] | Area %  |
|--------|---------------|------|-------------|--------------|--------------|---------|
| 1      | 24.945        | MF   | 0.7546      | 9768.51172   | 215.75325    | 76.8022 |
| 2      | 26.689        | FM   | 0.7509      | 2950.54517   | 65.48528     | 23.1978 |

Totals : 1.27191e4 281.23853

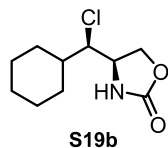

**(R)-4-((R)-chloro(o-tolyl)methyl)oxazolidin-2-one (S19b)**, separable from **S19a**:  $^1\text{H}$  NMR (400 MHz,  $\text{CDCl}_3$ ):  $\delta$  6.04 (s, 1H), 4.55 – 4.39 (m, 1H), 4.21 (q,  $J = 5.4, 5.0$  Hz, 2H), 3.73 (t,  $J = 5.6$  Hz, 1H), 1.86–1.71 (m, 3H), 1.72–1.51 (m, 3H), 1.24 (dddd,  $J = 31.7, 20.2, 8.0, 3.2$  Hz, 5H);  $^{13}\text{C}$  NMR (100 MHz,  $\text{CDCl}_3$ ):  $\delta$  158.9, 70.5, 67.6, 55.0, 40.6, 30.7, 27.9, 25.9, 25.8, 25.7; IR  $\nu_{\text{max}}$  (neat)/ $\text{cm}^{-1}$ : 2920 (s), 2857(s), 1765 (s), 1434 (w), 1352 (m), 1245(s), 1130(s), 1030 (s), 824 (s); HRMS (ESI,  $m/z$ ): calcd for  $\text{C}_{10}\text{H}_{17}\text{O}_2\text{NCl}^+$  ( $\text{M} + \text{H}^+$ ), 218.0942, found 218.0937. The *ee* was determined by Chiral HPLC analysis after benzylation (Chiral OD-H column, 10% EtOH in hexanes, flow rate = 1.0 mL/min, UV detection at 254 nm). The *anti*-diastereomer:  $t_r$ (minor) = 12.0 min,  $t_r$ (major) = 21.3 min, 10% *ee*.

Racemic sample of the **S19d**

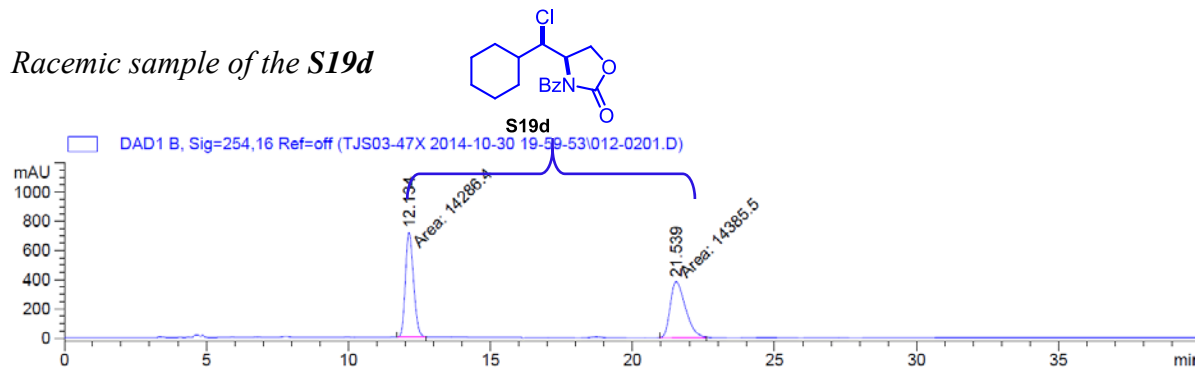

| Peak # | RetTime [min] | Type | Width [min] | Area [mAU*s] | Height [mAU] | Area %  |
|--------|---------------|------|-------------|--------------|--------------|---------|
| 1      | 12.134        | MM   | 0.3313      | 1.42864e4    | 718.77948    | 49.8271 |
| 2      | 21.539        | MM   | 0.6226      | 1.43855e4    | 385.07678    | 50.1729 |

Totals : 2.86719e4 1103.85626

Enantio-enriched sample of **S19d** (10% ee)

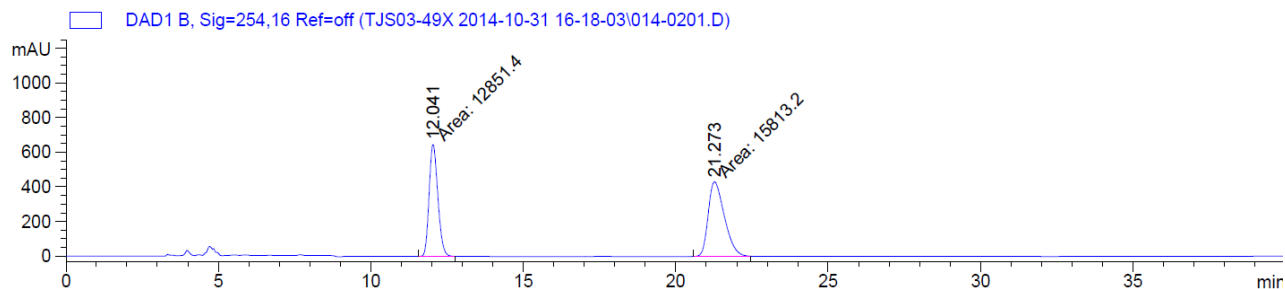

| Peak # | RetTime [min] | Type | Width [min] | Area [mAU*s] | Height [mAU] | Area %  |
|--------|---------------|------|-------------|--------------|--------------|---------|
| 1      | 12.041        | MM   | 0.3325      | 1.28972e4    | 646.45203    | 44.8627 |
| 2      | 21.273        | MM   | 0.6148      | 1.58510e4    | 429.67621    | 55.1373 |

Totals : 2.87482e4 1076.12823

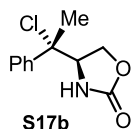

**(R)-4-((S)-1-chloro-1-phenylethyl)oxazolidin-2-one (S17b)**: by following the general procedure with ligand **L6** and carrying out reaction at  $-40\text{ }^{\circ}\text{C}$ , the product **S17b** and its *syn*-diastereomer **S17a** were obtained as a white solid (10 mg, 45% yield, *dr*: 2.3:1).  $^1\text{H}$  NMR (400 MHz,  $\text{CDCl}_3$ ):  $\delta$  7.57–7.49 (m, 2H), 7.44–7.32 (m, 3H), 4.41 (dd,  $J = 9.0, 4.3$  Hz, 1H), 4.26 (t,  $J = 9.2$  Hz, 1H), 4.09 (dd,  $J = 9.6, 4.3$  Hz, 1H), 1.97 (s, 3H);  $^{13}\text{C}$  NMR (100 MHz,  $\text{CDCl}_3$ ):  $\delta$  158.5, 140.1, 129.0, 128.9, 126.5, 73.6, 66.2, 62.6, 29.7, 24.3; IR  $\nu_{\text{max}}$  (neat)/ $\text{cm}^{-1}$ : 3260 (m), 3136 (w), 2984 (w), 2921 (w), 1749(s), 1040 (w), 1236 (m), 1046 (m), 701 (m); HRMS (ESI,  $m/z$ ): calcd for  $\text{C}_{11}\text{H}_{13}\text{NO}_2\text{Cl}^+$  ( $\text{M} + \text{H}^+$ ), 226.0635, found 226.0640. The *ee* was determined by Chiral HPLC analysis (Chiral OD-H column, 10% EtOH in hexanes, flow rate = 1.0 mL/min, UV detection at 205 nm). The *anti*-diastereomer:  $t_r$ (minor) = 18.3 min,  $t_r$ (major) = 25.8 min, 86% *ee*; the *syn*-diastereomer:  $t_r$ (minor) = 23.0 min,  $t_r$ (major) = 20.8 min, 50% *ee*.

Racemic sample

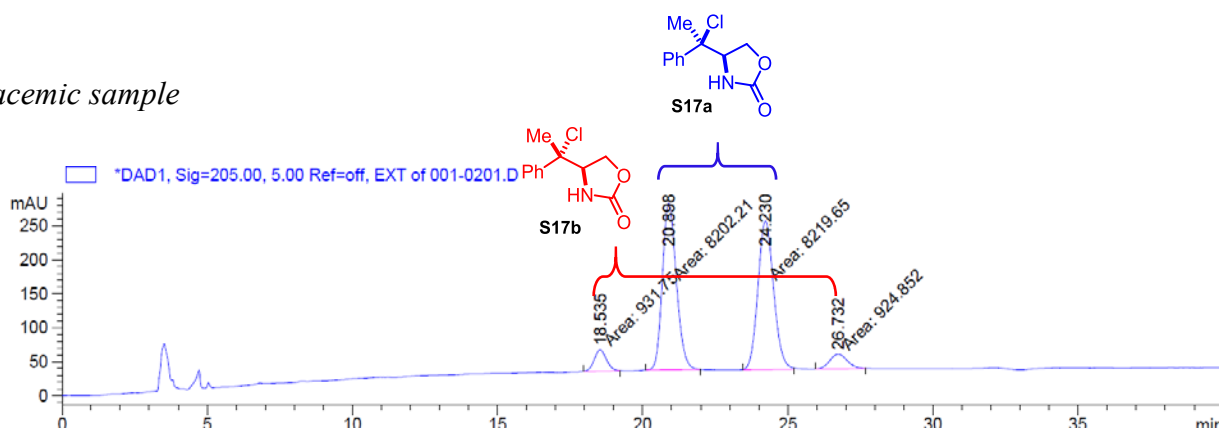

| Peak # | RetTime [min] | Type | Width [min] | Area [mAU*s] | Height [mAU] | Area %  |
|--------|---------------|------|-------------|--------------|--------------|---------|
| 1      | 18.535        | MM   | 0.4920      | 931.75006    | 31.56405     | 5.0975  |
| 2      | 20.898        | MM   | 0.5573      | 8202.20996   | 245.29901    | 44.8736 |
| 3      | 24.230        | MM   | 0.6271      | 8219.65137   | 218.46324    | 44.9691 |
| 4      | 26.732        | MM   | 0.7016      | 924.85156    | 21.97011     | 5.0598  |

Totals : 1.82785e4 517.29642

Enantio-enriched sample **S17b** (86% ee): it was obtained by using **L6** ligand.

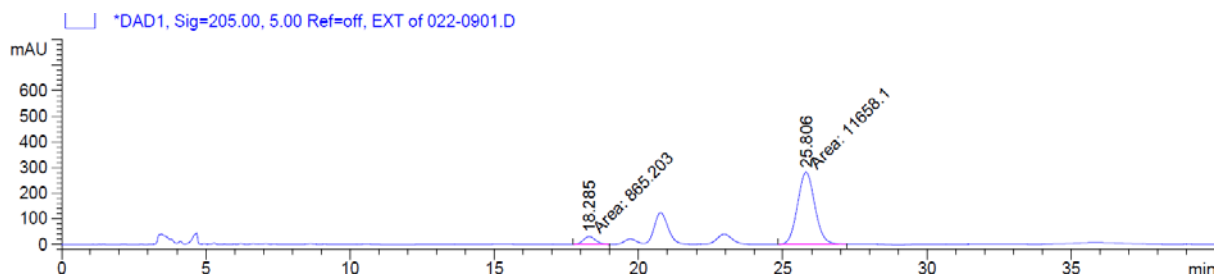

| Peak # | RetTime [min] | Type | Width [min] | Area [mAU*s] | Height [mAU] | Area %  |
|--------|---------------|------|-------------|--------------|--------------|---------|
| 1      | 18.285        | MM   | 0.4802      | 865.20325    | 30.02811     | 6.9087  |
| 2      | 25.806        | MM   | 0.6897      | 1.16581e4    | 281.70096    | 93.0913 |

Totals : 1.25233e4 311.72907

Enantio-enriched sample **S17a** (50 % ee): it was obtained by using **L6** ligand.



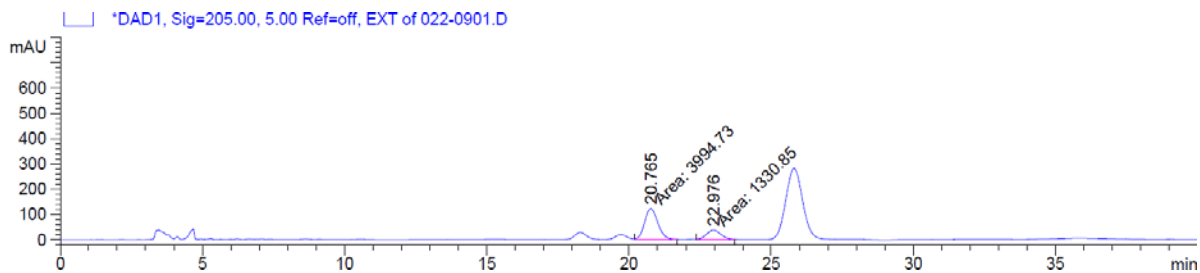

| Peak # | RetTime [min] | Type | Width [min] | Area [mAU*s] | Height [mAU] | Area %  |
|--------|---------------|------|-------------|--------------|--------------|---------|
| 1      | 20.765        | FM   | 0.5415      | 3994.73242   | 122.94210    | 75.0102 |
| 2      | 22.976        | MM   | 0.5796      | 1330.85083   | 38.26603     | 24.9898 |

Totals : 5325.58325 161.20813

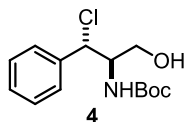

***tert*-Butyl ((1*S*,2*R*)-1-chloro-3-hydroxy-1-phenylpropan-2-yl)carbamate (4)**: by following a literature procedure, **4** was obtained from **2a** (87% yield for two steps).<sup>2</sup> At room temperature, to a round bottom flask equipped with a magnetic stir bar were added **2a** (0.2 mmol, 1.0 equiv), anhydrous CH<sub>2</sub>Cl<sub>2</sub> (3 mL), Et<sub>3</sub>N (0.24 mmol, 1.2 equiv), DMAP (0.02 mmol, 0.1 equiv) and Boc<sub>2</sub>O (0.3 mmol, 1.5 equiv). The reaction mixture was then stirred at room temperature until **2a** was fully consumed monitored by TLC. After evaporating the solvent, the residue was purified through gradient silica gel flash column chromatography (hexanes/EtOAc: from 6:1 to 2:1) to afford the *N*-Boc-protected intermediate (61 mg, 99% yield). The obtained *N*-Boc-protected intermediate (0.2 mmol, 1.0 equiv) was dissolved in MeOH (2 mL); Cs<sub>2</sub>CO<sub>3</sub> (0.02 mmol) was added and the mixture was stirred at room temperature until all the starting material was consumed. The reaction was quenched with saturated NH<sub>4</sub>Cl solution. After removal of MeOH, the aqueous phase was extracted with CH<sub>2</sub>Cl<sub>2</sub> (4 × 5 mL) and then dried over anhydrous Na<sub>2</sub>SO<sub>4</sub>. After evaporating the solvent, the residue was purified through gradient silica gel flash column chromatography (hexanes/EtOAc: from 6:1 to 3:1) to afford chloro amino alcohol **4** (51 mg, 88% yield). <sup>1</sup>H NMR (400 MHz, CDCl<sub>3</sub>) δ 7.43 (d, *J* = 7.2 Hz, 2H), 7.40–7.27 (m, 3H), 5.15 (d, *J* = 5.5 Hz, 1H), 4.96 (d, *J* = 8.8 Hz, 1H), 4.15–4.09 (m, 1H), 4.04 (dd, *J* = 11.3, 4.7 Hz, 1H), 3.75 (dd, *J* = 11.3, 3.6 Hz, 1H), 2.04 (s, 1H), 1.32 (s, 9H); <sup>13</sup>C NMR (100 MHz, CDCl<sub>3</sub>) δ 155.4, 138.0, 128.5, 128.5, 127.9, 80.0, 62.2, 61.9, 57.6, 28.2; IR  $\nu_{\text{max}}$  (neat)/cm<sup>-1</sup>: 3316 (br), 2977 (m), 2970 (w), 1744 (s), 1691(s), 1498 (m), 1455 (m), 1392 (m), 1367 (m), 1250 (m), 1168 (s), 1052 (m), 698 (m); HRMS (ESI, *m/z*): calcd for C<sub>14</sub>H<sub>21</sub>NO<sub>3</sub>Cl<sup>+</sup> (M + H<sup>+</sup>), 286.1192, found 286.1195.

The enantio-enriched **4** was obtained from enantio-enriched **2a** (obtained by using *ent*-**L5** ligand) by following the above procedure. (*dr*: 15:1, 85% yield over two steps).  $[\alpha]_D^{20} = -31^\circ$  (*c* 1.0, CH<sub>2</sub>Cl<sub>2</sub>). The *ee* was determined by Chiral HPLC analysis (Chiral OD-H column, 5% EtOH in hexanes, flow rate = 1.0 mL/min, UV detection at 215 nm): *t<sub>r</sub>*(minor) = 9.9 min, *t<sub>r</sub>*(major) = 7.1 min, 88% *ee*.

Racemic sample of **4** (*dr*: 1:1)

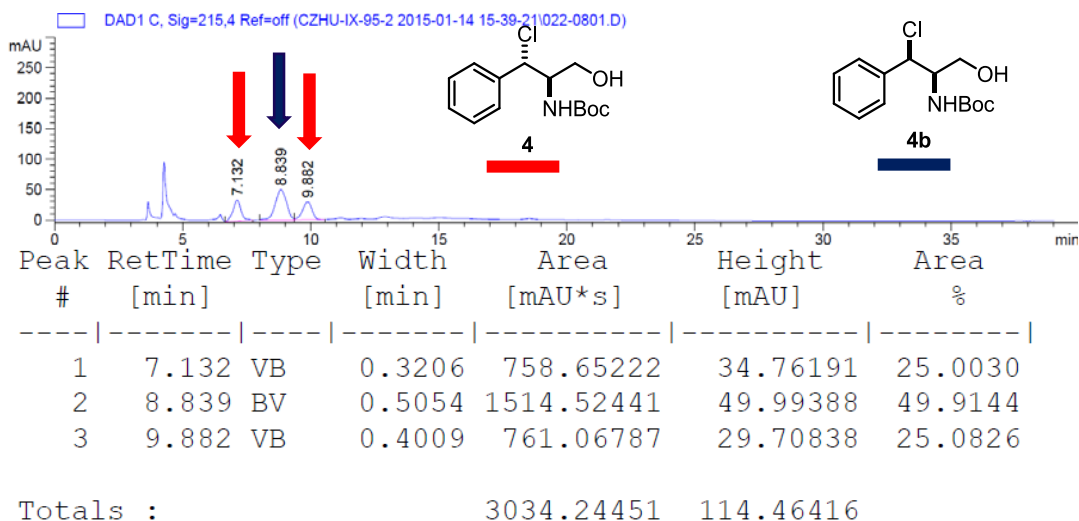

Racemic sample of **4** (*dr* >20:1)

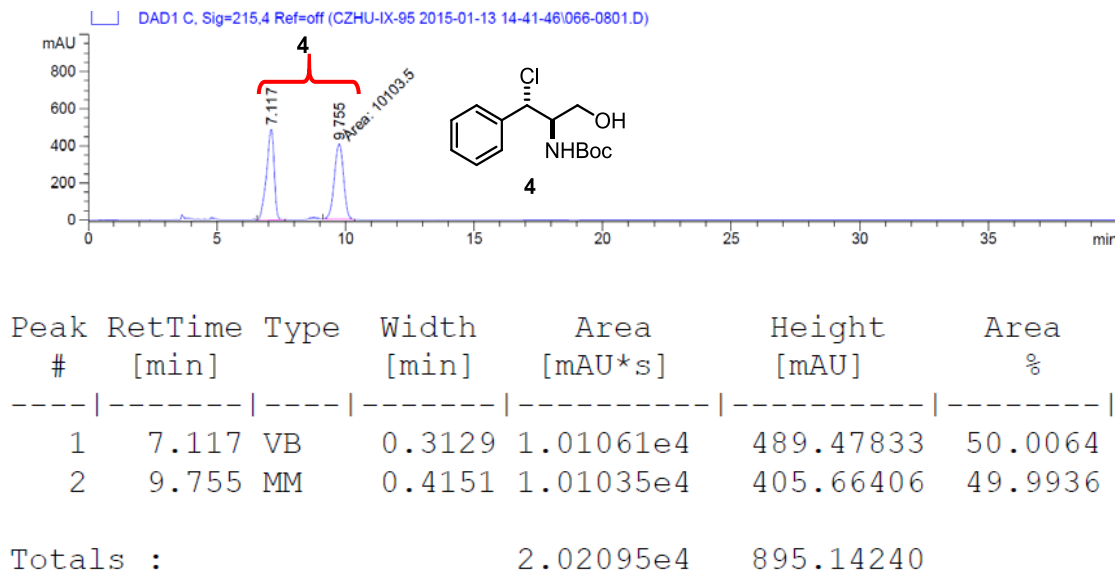

Enantio-enriched sample of **4** (dr: 15:1, 88% ee.)

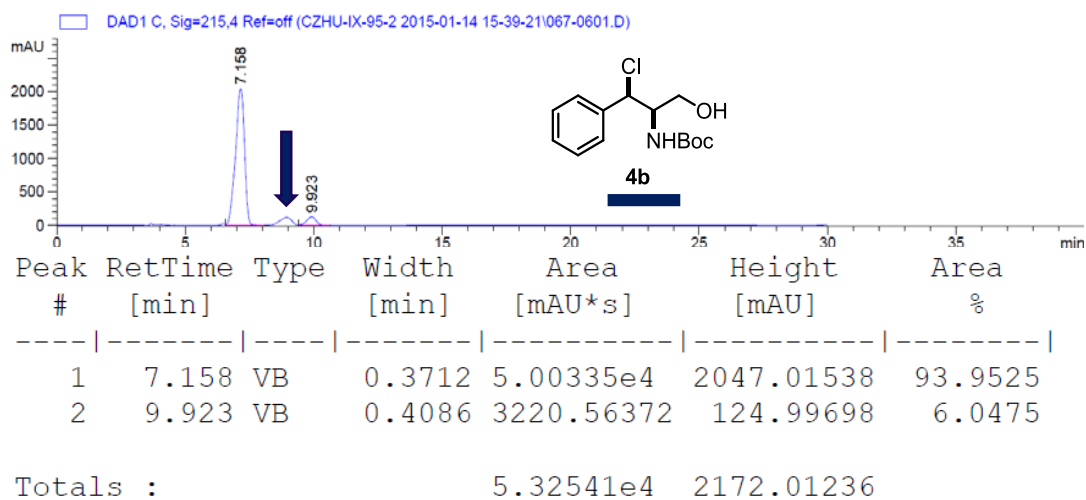

## D. Mechanistic Investigation of the Iron-Catalyzed Asymmetric Olefin Aminochlorination

### a. Fe(NTf<sub>2</sub>)<sub>2</sub>-Catalyzed Asymmetric Aminochlorination and Aminohydroxylation with Isomeric Olefins

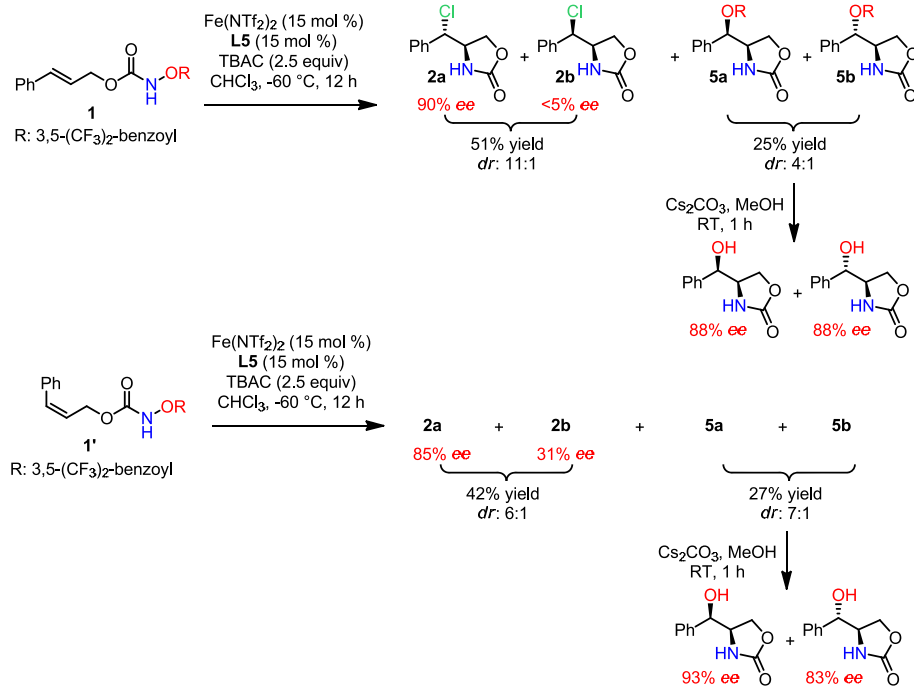

**Procedure.** To a flame-dried sealable 2-dram vial (vial **A**) equipped with a magnetic stir bar were added Fe(NTf<sub>2</sub>)<sub>2</sub> (9.2 mg, 0.015 mmol, 15 mol %) and ligand **L5** (7.3 mg, 0.015 mmol, 15 mol %). After the vial was evacuated and backfilled with N<sub>2</sub> for three times, CHCl<sub>3</sub> (1.0 mL, re-distilled and anhydrous) was added and the mixture was stirred at room temperature for 20 min. Meanwhile, a second flame-dried and N<sub>2</sub>-protected 2-dram vial (vial **B**) with a magnetic stir bar was charged with the substrate (**1** or **1'**, 0.1 mmol), anhydrous TBAC (69.5 mg, 0.25 mmol), freshly activated 4 Å molecular sieves and CHCl<sub>3</sub> (3.0 mL, re-distilled and anhydrous). Both vials were degassed by brief evacuation and back filling with N<sub>2</sub> twice. Vial **B** was cooled down to -60 °C, and the catalyst solution in vial **A** was added to vial **B** drop wise via a syringe. The resulting solution was stirred at this temperature for 12 h and then quenched with 1 mL saturated NaHCO<sub>3</sub> solution. The reaction mixture was extracted with CH<sub>2</sub>Cl<sub>2</sub> (1.5 mL × 3), and the combined organic phase was concentrated *in vacuo*. The residue was purified through a gradient

silica gel flash column chromatography (hexanes/acetone: from 15:1 to 4:1) to afford both the aminochlorination product **2a/b** and the aminohydroxylation product **5a/b**. The *dr* was determined by <sup>1</sup>H NMR analysis and the *ee* of **2a/b** was directly measured by chiral HPLC analysis. The *ee* of **5a/b** was measured after the hydrolysis.<sup>1</sup>

### b. Rate Acceleration Effect of External Chloride Ion

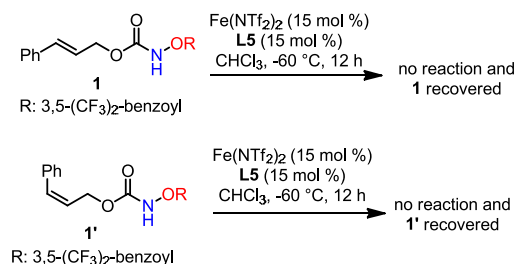

**Procedure.** These experiments were carried out under the condition described above, except in the absence of TBAC. Under this condition, both **1** and **1'** were fully recovered.

### c. FeCl<sub>2</sub>-Catalyzed and Mediated Asymmetric Olefin Aminochlorination Reactions

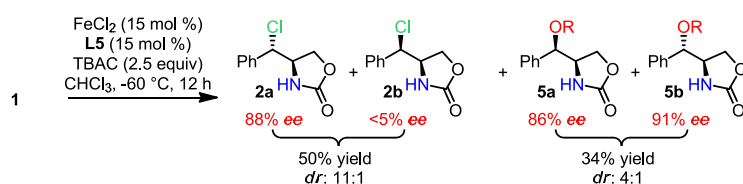

**Procedure.** To a flame-dried sealable 2-dram vial (vial **A**) equipped with a magnetic stir bar were added FeCl<sub>2</sub> (0.015 mmol, 15 mol %) and ligand **L5** (7.3 mg, 0.015 mmol, 15 mol %). After the vial was evacuated and backfilled with N<sub>2</sub> for three times, CHCl<sub>3</sub> (1.0 mL, re-distilled and anhydrous) was added and the mixture was stirred at room temperature for 20 min. Meanwhile, a second flame-dried and N<sub>2</sub>-protected 2-dram vial (vial **B**) with a magnetic stir bar was charged with **1** (0.1 mmol), anhydrous TBAC (69.5 mg, 0.25 mmol), freshly activated 4 Å molecular sieves and CHCl<sub>3</sub> (3.0 mL, re-distilled and anhydrous). Both vials were degassed by brief evacuation and back filling with N<sub>2</sub> twice. Vial **B** was cooled down to -60 °C, and the catalyst solution in vial **A** was added to vial **B** drop wise via a syringe. The resulting solution

was stirred at this temperature for 12 h and then quenched with 1 mL saturated NaHCO<sub>3</sub> solution. The reaction mixture was extracted with CH<sub>2</sub>Cl<sub>2</sub> (1.5 mL × 3), and the combined organic phase was concentrated *in vacuo*. The residue was purified through a gradient silica gel flash column chromatography (hexanes/acetone: from 15:1 to 4:1) to afford both the aminochlorination product **2a/b** and the aminohydroxylation product **5a/b**. The *dr* was determined by <sup>1</sup>H NMR analysis and the *ee* of **2a/b** was directly measured by chiral HPLC analysis. The *ee* of **5a/b** was measured after the hydrolysis.

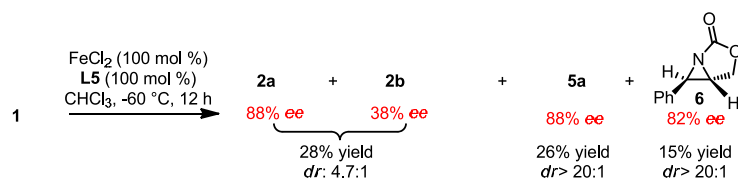

**Procedure.** To a flame-dried sealable 2-dram vial (vial **A**) equipped with a magnetic stir bar were added FeCl<sub>2</sub> (0.1 mmol, 100 mol %) and ligand **L5** (0.1 mmol, 100 mol %). After the vial was evacuated and backfilled with N<sub>2</sub> for three times, CHCl<sub>3</sub> (1.0 mL, re-distilled and anhydrous) was added and the mixture was stirred at room temperature for 20 min. Meanwhile, a second flame-dried and N<sub>2</sub>-protected 2-dram vial (vial **B**) with a magnetic stir bar was charged with **1** (0.1 mmol), freshly activated 4 Å molecular sieves and CHCl<sub>3</sub> (3.0 mL, re-distilled and anhydrous). Both vials were degassed by brief evacuation and back filling with N<sub>2</sub> twice. Vial **B** was cooled down to -60 °C, and the catalyst solution in vial **A** was added to vial **B** drop wise via a syringe. The resulting solution was stirred at this temperature for 12 h and then quenched with 1 mL saturated NaHCO<sub>3</sub> solution. The reaction mixture was extracted with CH<sub>2</sub>Cl<sub>2</sub> (1.5 mL × 3), and the combined organic phase was concentrated *in vacuo*. The residue was purified through a gradient silica gel flash column chromatography (hexanes/acetone: from 15:1 to 4:1) to afford both the aminochlorination product **2a/b**, the aminohydroxylation product **5a**, and the aziridine **6**. The *dr* was determined by <sup>1</sup>H NMR analysis and the *ee* of **2a/b** and **6** was directly measured by chiral HPLC analysis.<sup>1</sup> The *ee* of **5a** was measured after the hydrolysis.

## E. References

1. G.-S. Liu, Y.-Q. Zhang, Y.-A. Yuan and H. Xu, *J. Am. Chem. Soc.*, 2013, **135**, 3343.
2. D.-F. Lu, G.-S. Liu, C.-L. Zhu, B. Yuan and H. Xu, *Org. Lett.*, 2014, **16**, 2912.
3. D.-F. Lu, C.-L. Zhu, Z.-X. Jia and H. Xu, *J. Am. Chem. Soc.*, 2014, **136**, 13186.
4. T. Bach, B. Schlummer and K. Harms, *Chem.-Eur. J.*, 2001, **7**, 2581.
5. E. G. Gutierrez, C. J. Wong, A. H. Sahin and A. K. Franz, *Org. Lett.*, 2011, **13**, 5754.
6. G. Desimoni, G. Faita, M. Guala and C. Pratelli, *Tetrahedron Asymmetr.*, 2002, **13**, 1651.
7. A. Cornejo, J. M. Fraile, J. I. García, M. J. Gil, V. Martínez-Merino, J. A. Mayoral, E. Pires and I. Villalba, *Synlett*, 2005, 2321.



## F. NMR Spectra

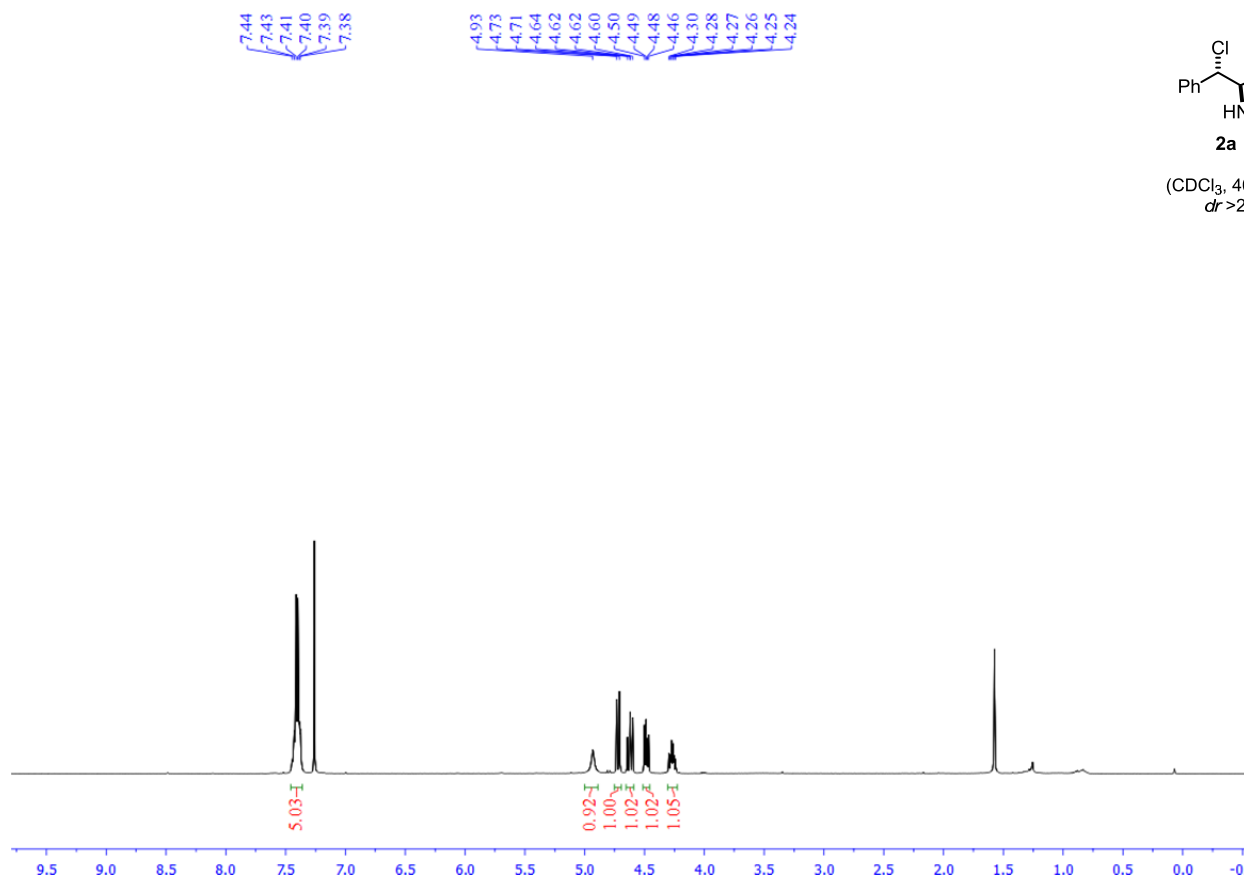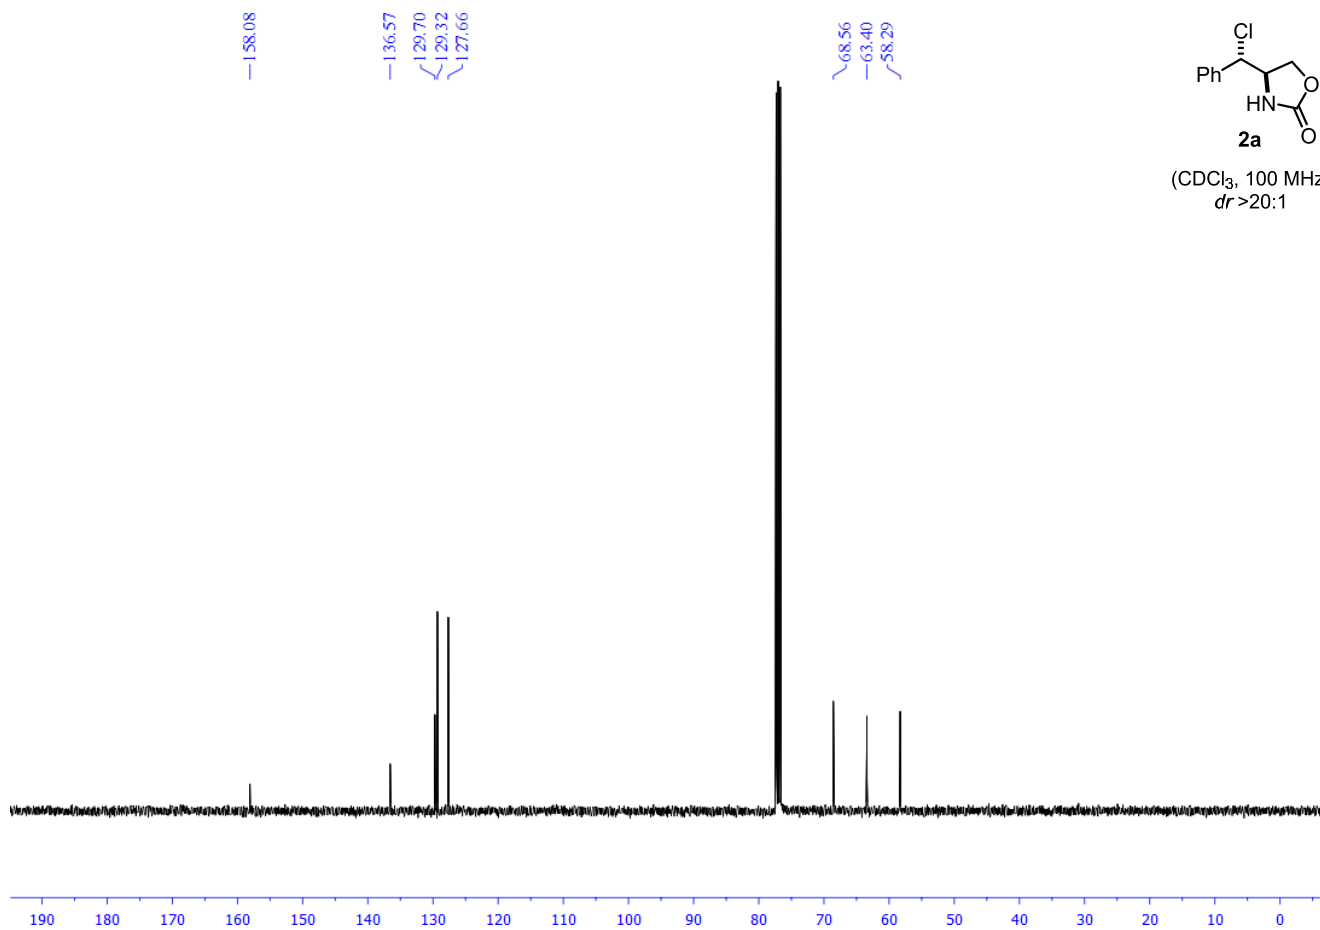

8.55  
8.43  
8.14  
7.30  
7.28  
7.14  
7.12  
6.70  
6.66  
6.28  
6.26  
6.25  
6.24  
6.22  
6.21  
4.90  
4.89  
4.88

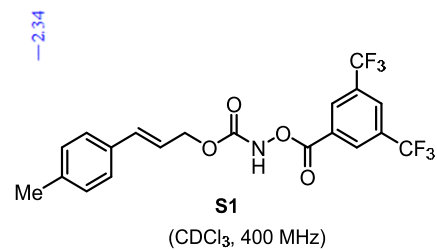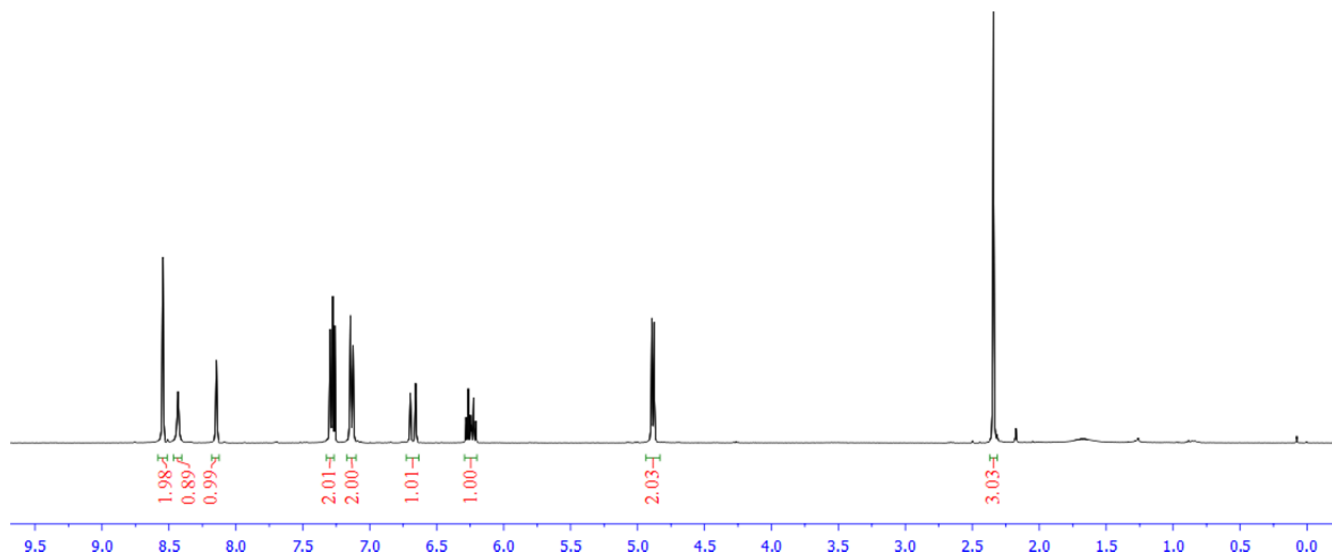

163.37  
156.06  
138.40  
135.68  
133.20  
133.01  
132.86  
132.52  
132.18  
130.13  
130.09  
130.08  
130.06  
130.05  
130.01  
129.36  
129.00  
127.63  
127.60  
127.56  
126.67  
126.66  
123.95  
121.24  
120.55  
21.24

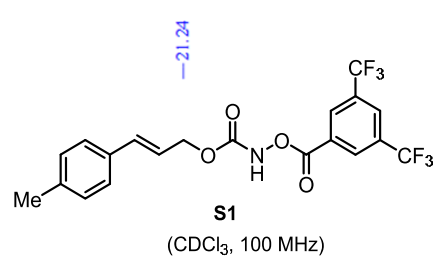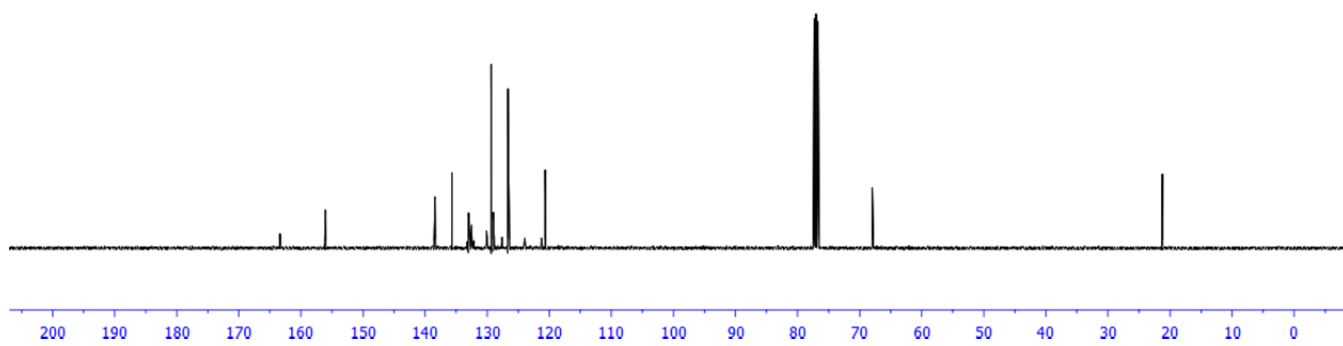

8.55  
8.49  
— 8.15  
7.51  
7.34  
7.26  
7.23  
7.22  
7.21  
7.11  
7.07  
6.30  
6.29  
6.28  
6.26  
6.25  
4.94  
4.93

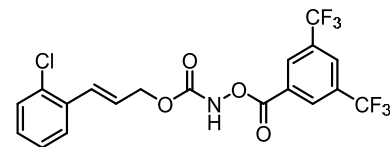

**S2**  
(CDCl<sub>3</sub>, 400 MHz)

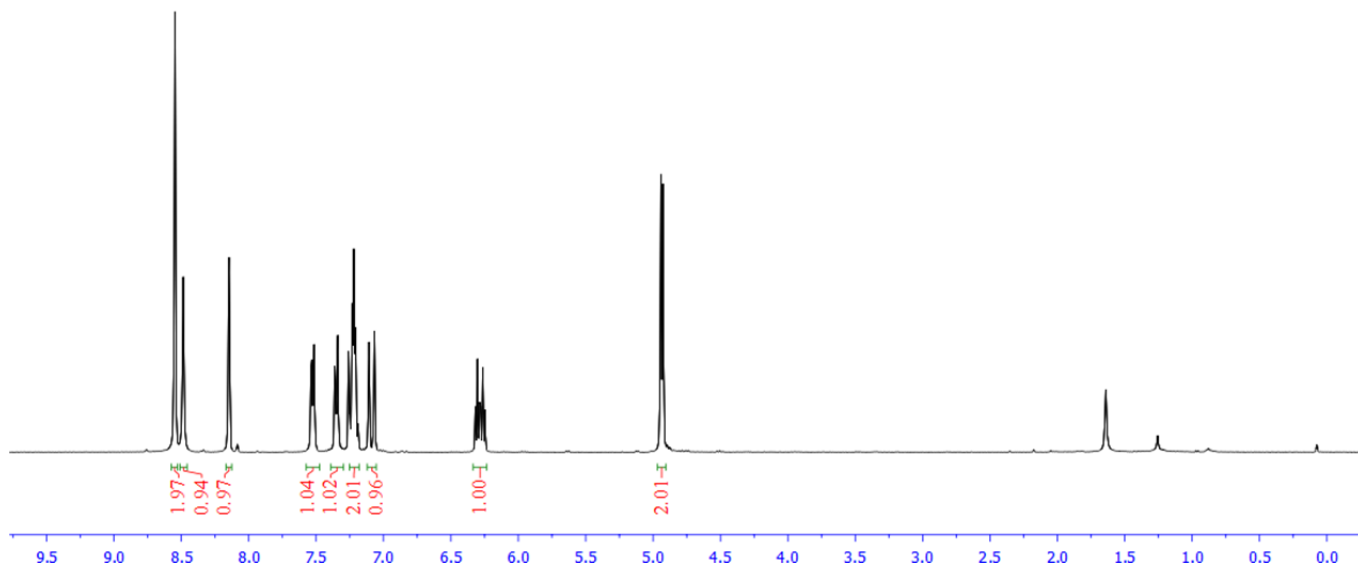

163.38  
155.99  
133.99  
133.38  
133.21  
132.86  
132.52  
132.18  
131.23  
130.12  
130.09  
129.80  
129.37  
128.94  
127.73  
127.70  
127.66  
127.63  
127.59  
127.05  
126.96  
124.66  
123.95  
121.24  
67.45

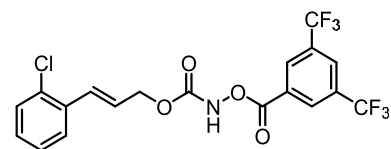

**S2**  
(CDCl<sub>3</sub>, 100 MHz)

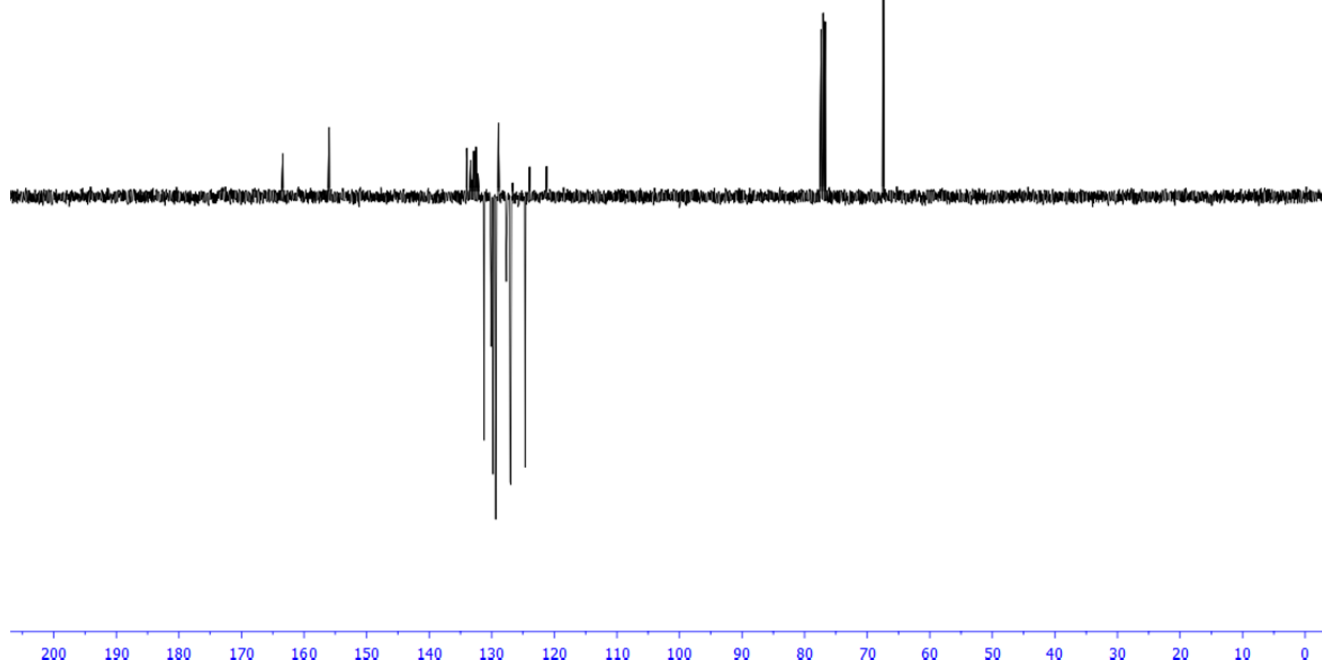

-9.16  
 8.63  
 8.56  
 8.52  
 8.50  
 8.15  
 7.73  
 7.71  
 7.28  
 7.26  
 6.72  
 6.68  
 6.41  
 6.40  
 6.38  
 6.37  
 6.36  
 6.34  
 4.93  
 4.91

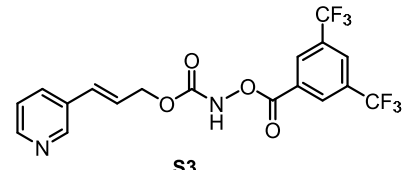

(CDCl<sub>3</sub>, 400 MHz)

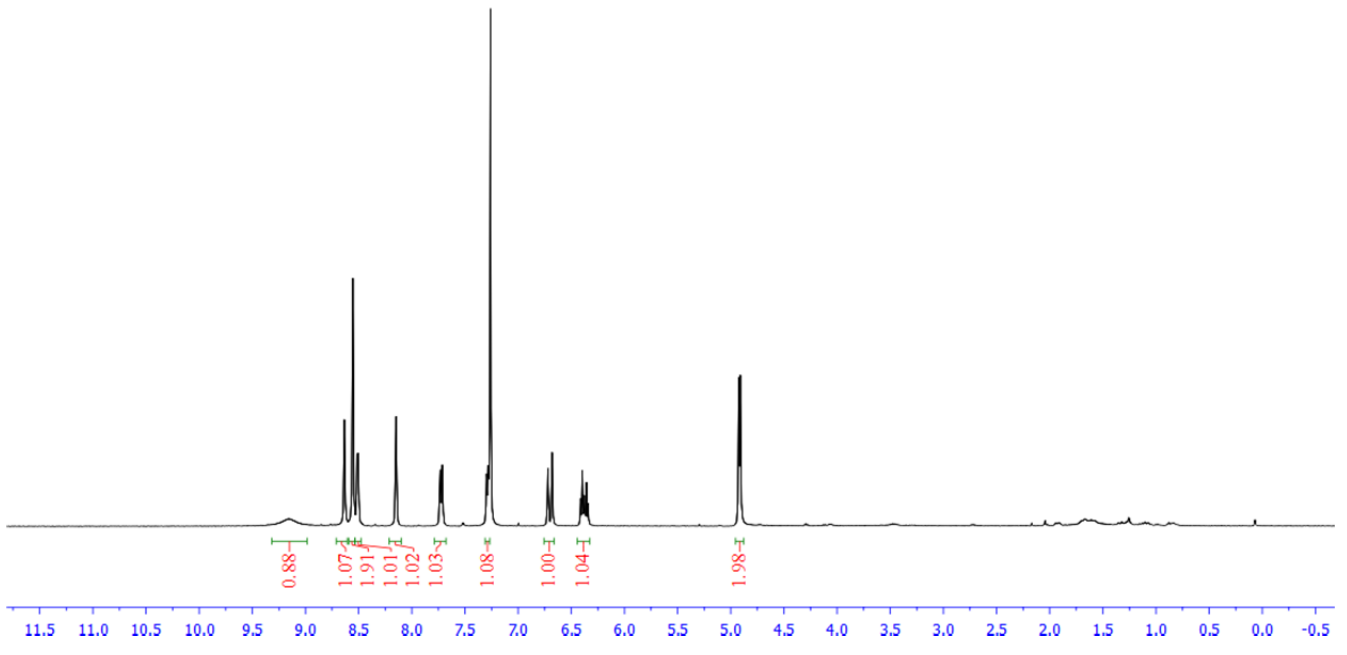

-163.38  
 -156.01  
 149.17  
 148.34  
 133.33  
 133.22  
 132.88  
 132.54  
 132.20  
 131.65  
 131.20  
 130.14  
 130.10  
 130.07  
 130.06  
 130.02  
 129.04  
 127.68  
 127.65  
 127.61  
 127.58  
 127.54  
 126.66  
 124.58  
 123.95  
 123.64  
 121.23  
 -66.92

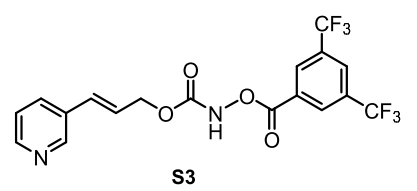

(CDCl<sub>3</sub>, 100 MHz)

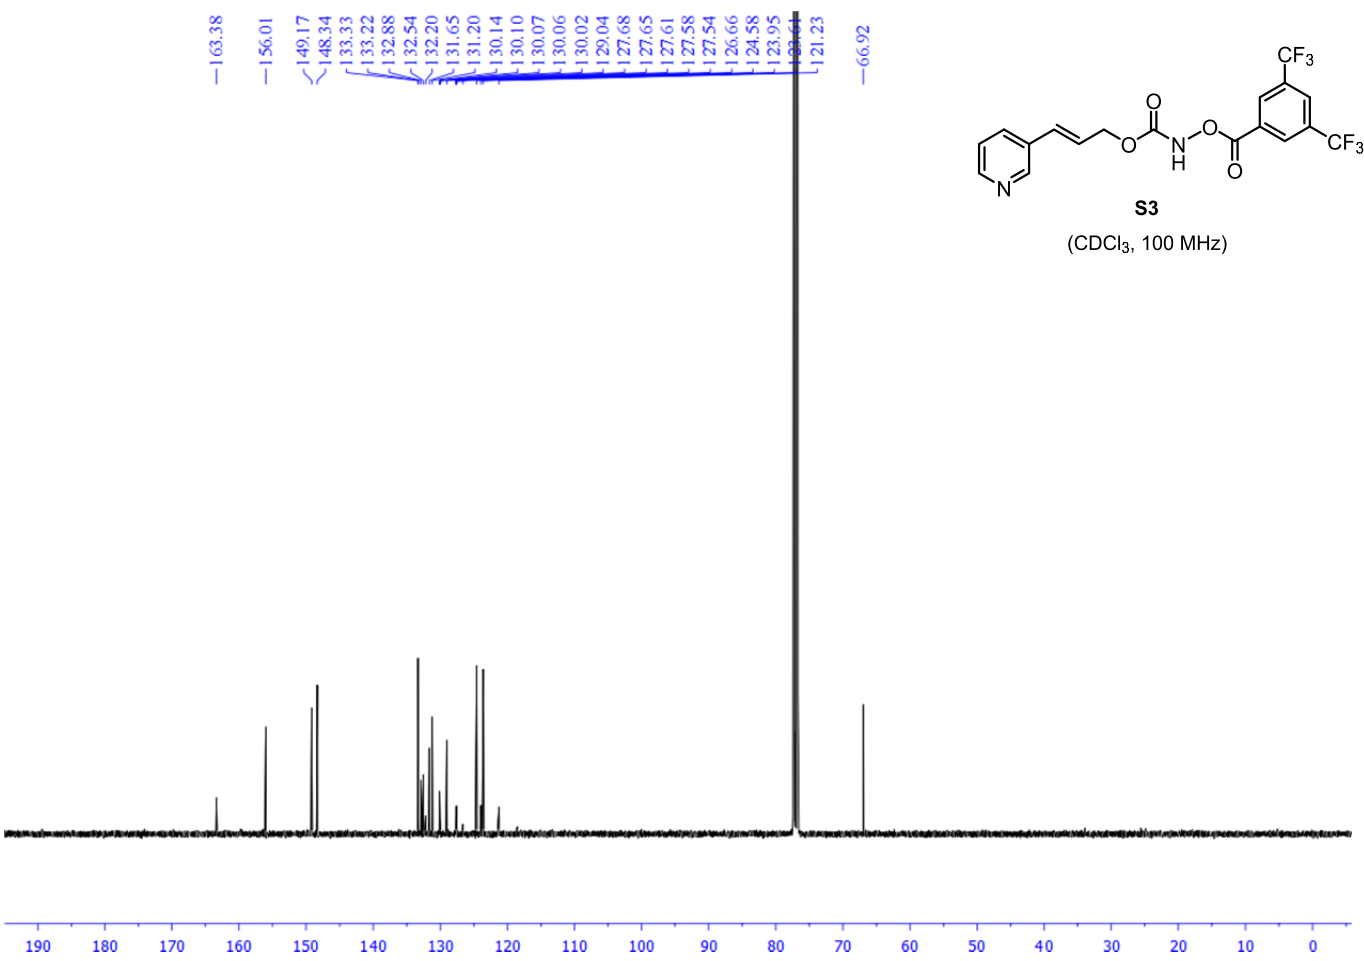

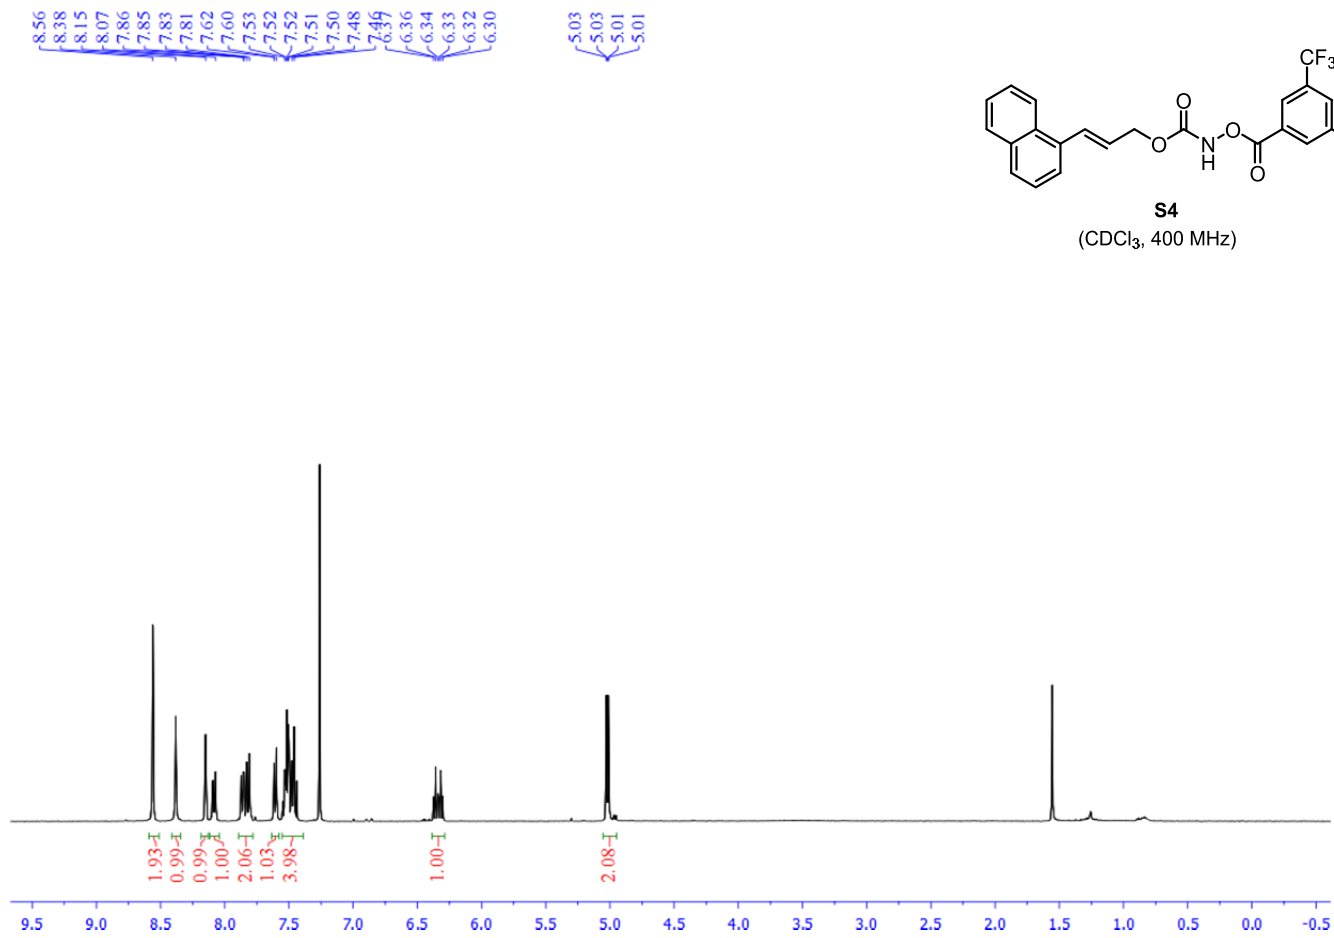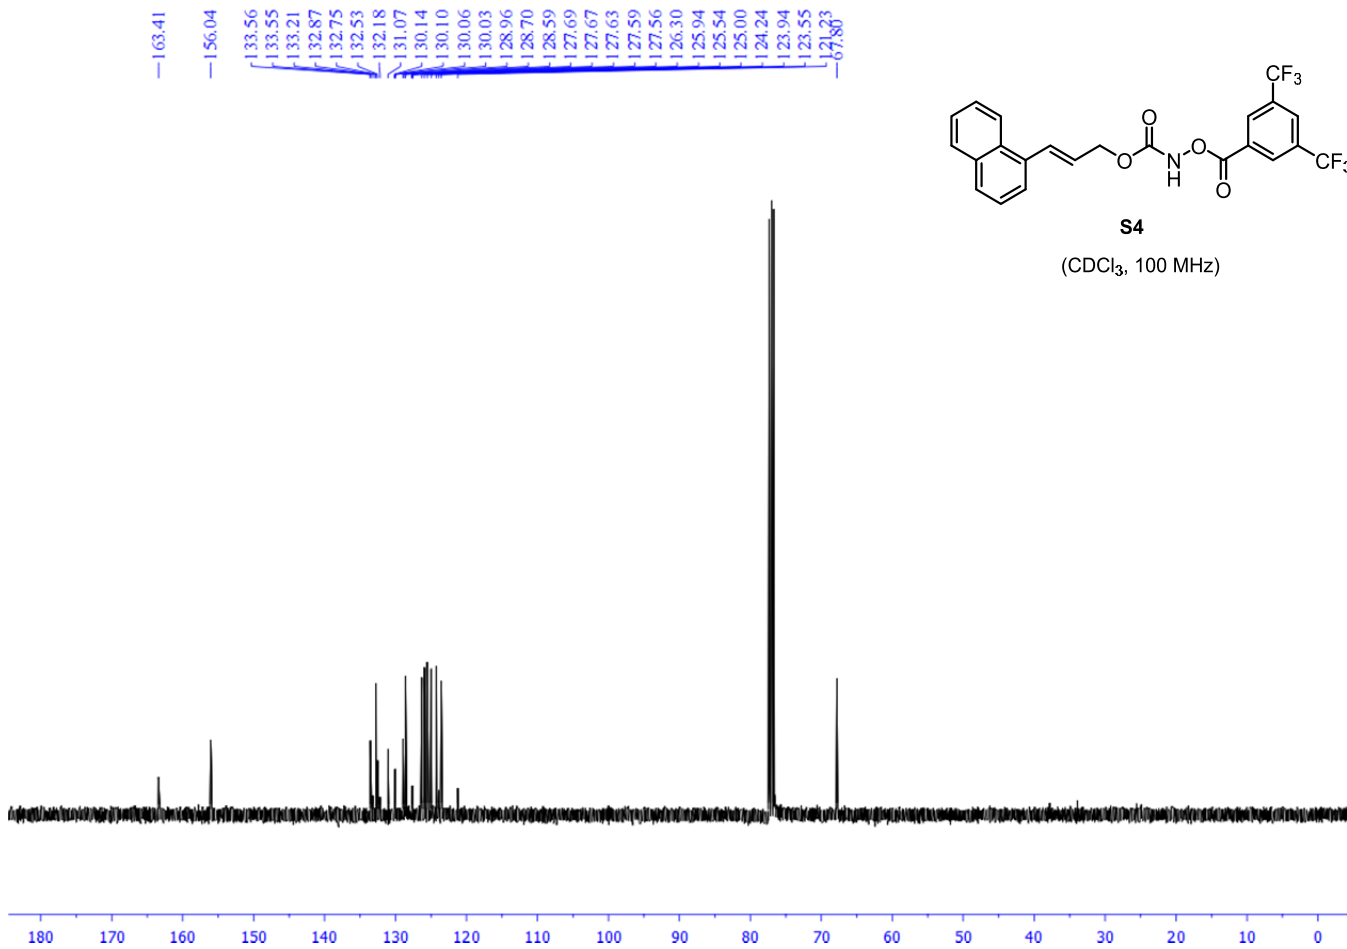

8.56  
8.40  
8.15  
7.81  
7.80  
7.79  
7.76  
7.48  
7.30  
6.86  
6.46  
6.45  
6.43  
6.42  
6.41  
6.39  
4.97  
4.95

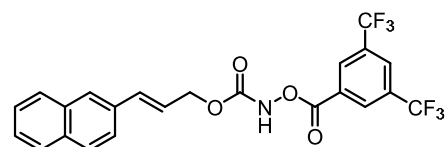

S5

(CDCl<sub>3</sub>, 400 MHz)

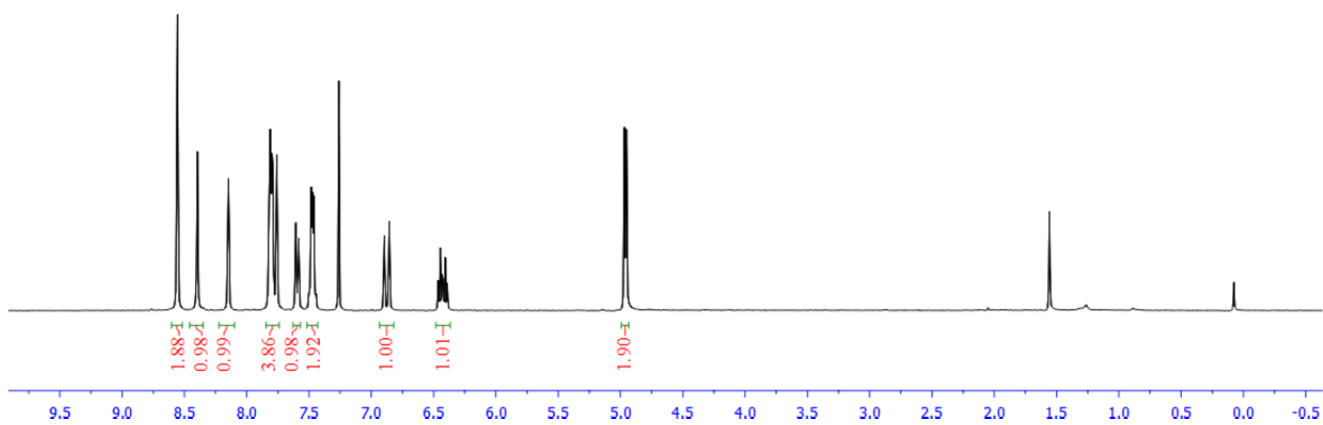

163.38  
156.00  
135.68  
133.44  
133.33  
133.24  
132.88  
132.54  
132.19  
130.13  
130.11  
130.10  
130.09  
130.06  
130.05  
130.03  
130.02  
128.96  
128.39  
128.10  
127.69  
127.19  
126.44  
126.30  
123.40  
122.07  
67.83

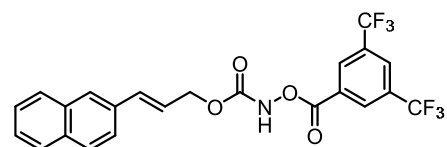

S5

(CDCl<sub>3</sub>, 100 MHz)

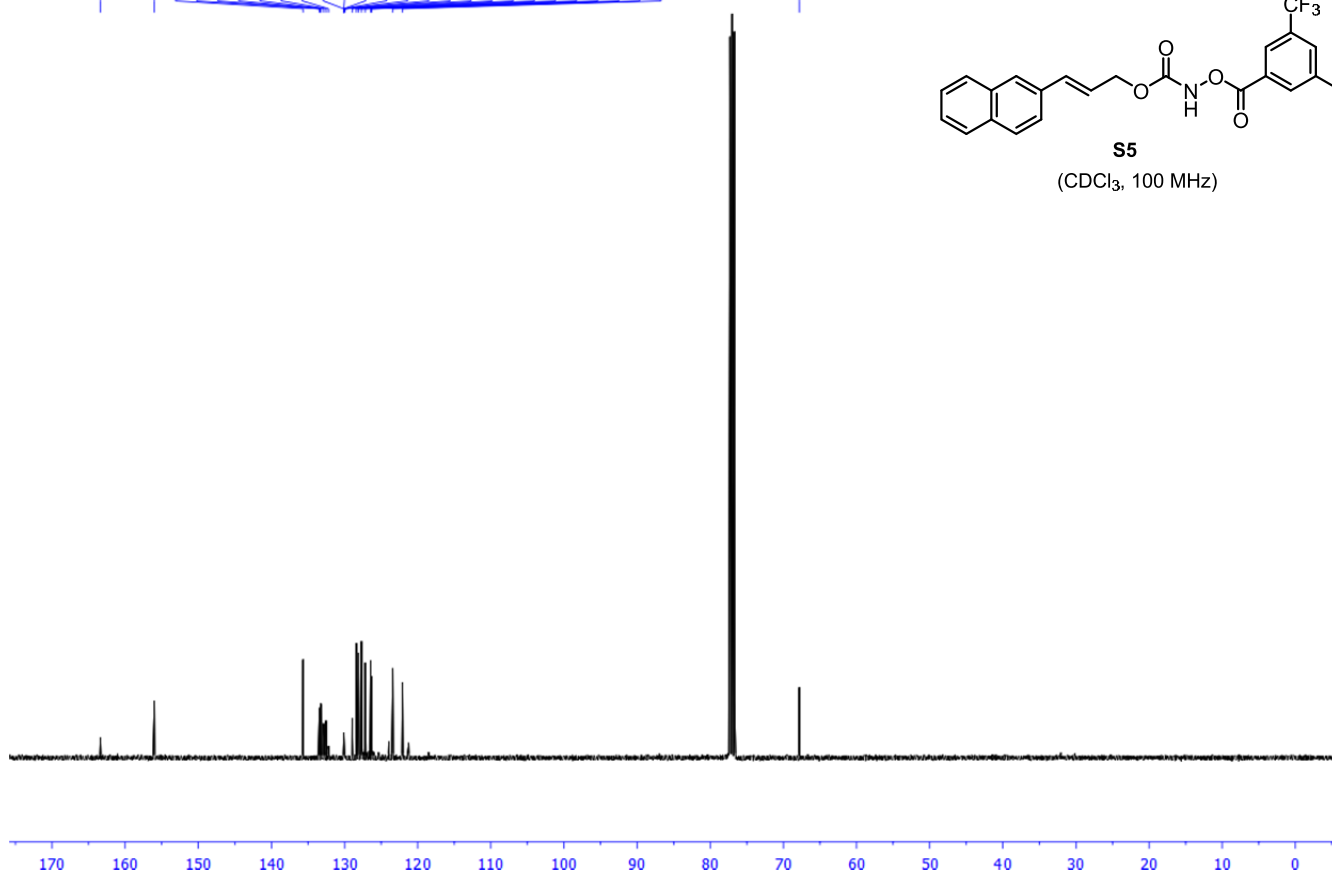

8.54  
8.30  
8.15

5.81  
5.80  
5.78  
5.76  
5.57  
5.55  
5.54  
5.52  
5.50  
4.68  
4.67

2.00  
1.98  
1.73  
1.71  
1.67  
1.64  
1.31  
1.28  
1.25  
1.22  
1.19  
1.16  
1.13  
1.12  
1.11  
1.08  
1.06  
1.03  
1.02

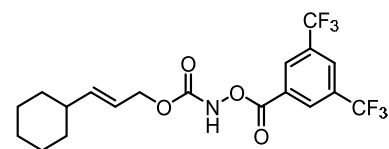

**S6**

(CDCl<sub>3</sub>, 400 MHz)

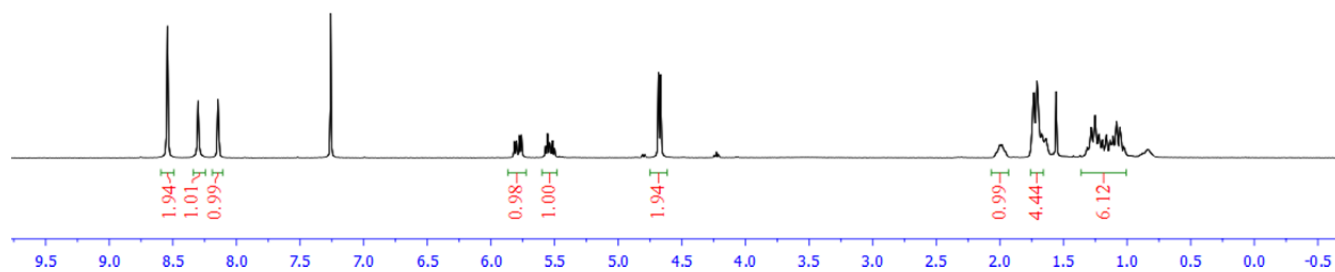

163.41  
156.14

143.78  
133.18  
132.84  
132.50  
132.16  
130.09  
130.06  
129.07  
127.65  
127.61  
127.61  
127.58  
127.58  
127.54  
127.54  
126.68  
125.96  
121.25  
120.18  
118.51

68.23

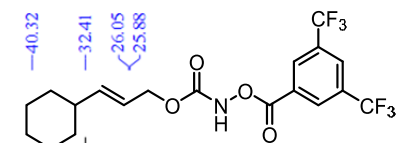

**S6**

(CDCl<sub>3</sub>, 100 MHz)

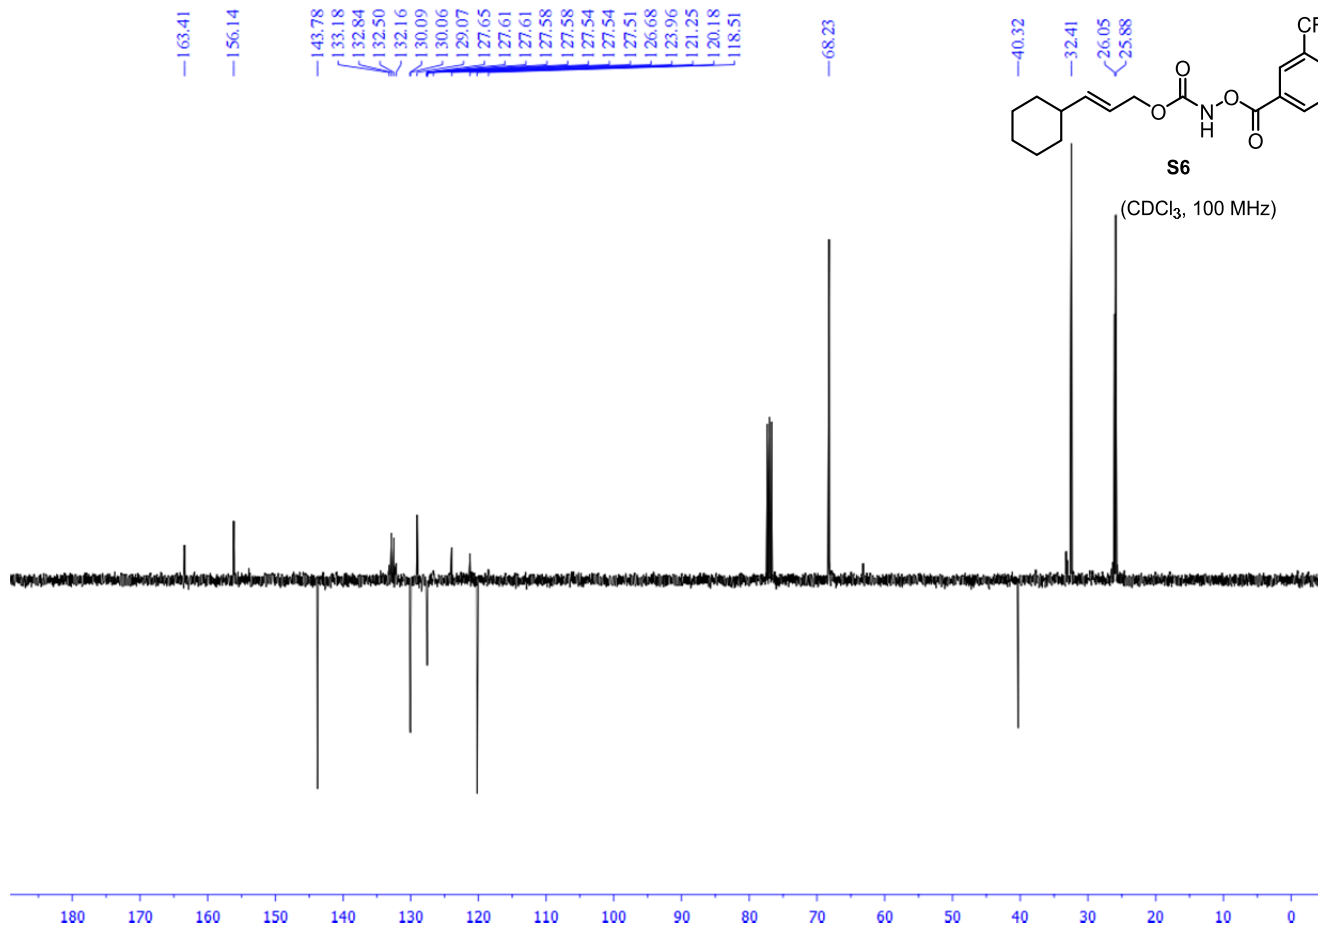

8.47  
8.16  
7.41  
7.39  
7.32  
7.30  
7.28  
7.27  
7.25  
5.59  
5.43  
5.16

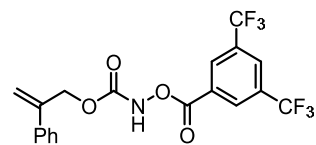

S7

(CDCl<sub>3</sub>, 400 MHz)

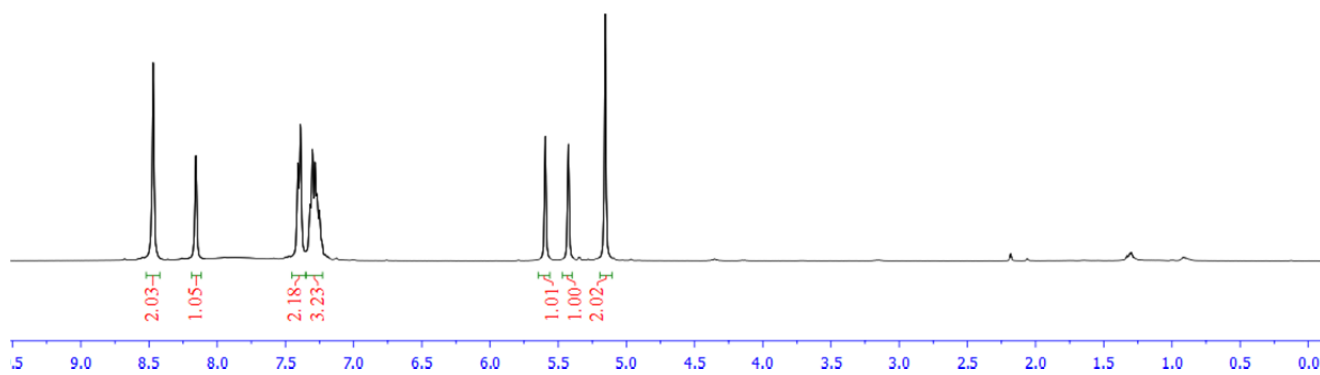

163.38  
156.20  
141.67  
137.36  
133.07  
132.73  
132.39  
132.05  
130.03  
130.00  
128.93  
128.49  
128.19  
127.59  
127.56  
127.52  
127.49  
127.45  
126.69  
125.93  
123.97  
121.26  
118.54  
68.22

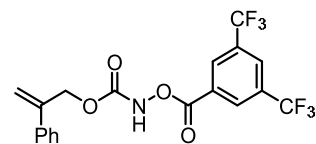

S7

(CDCl<sub>3</sub>, 100 MHz)

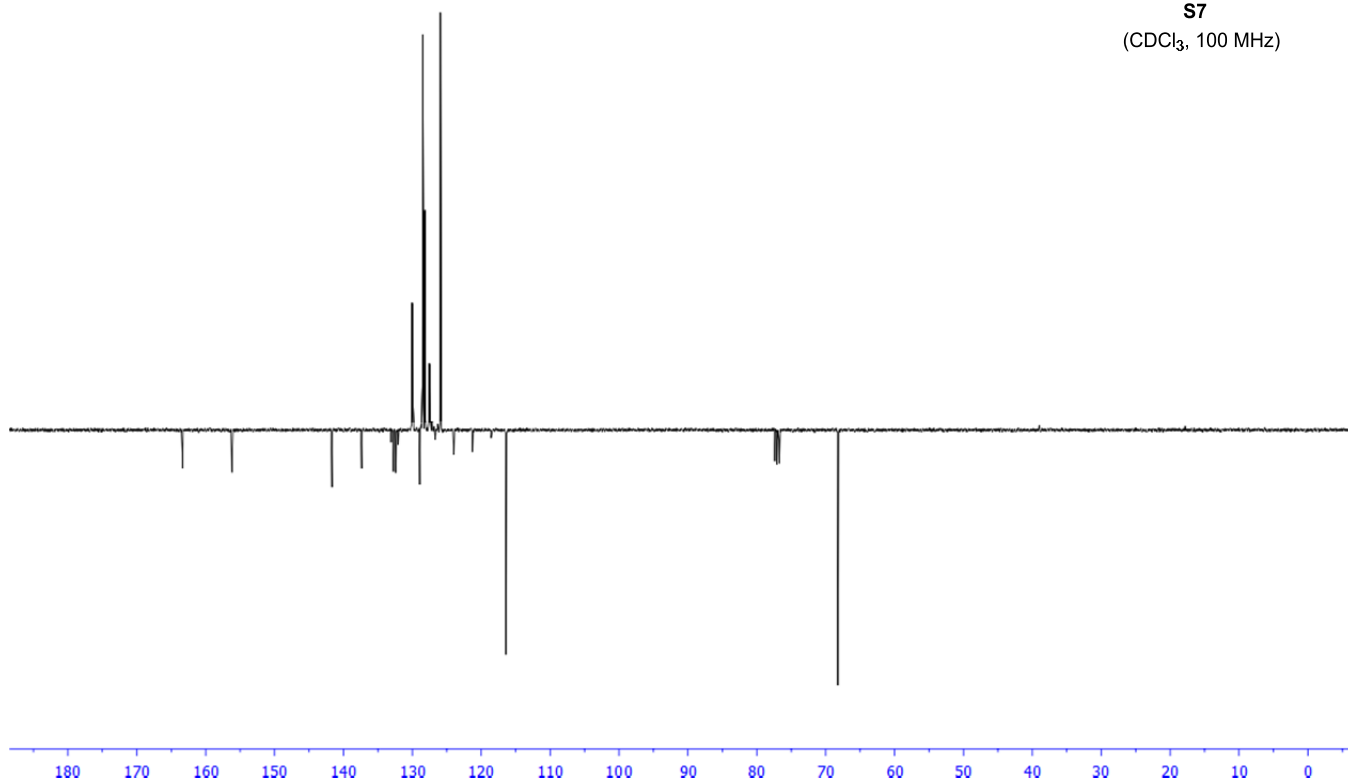



8.53  
8.42  
8.14  
6.33  
6.30  
6.29  
6.26  
6.05  
6.04  
6.02  
6.02  
5.81  
5.79  
5.77  
5.75  
5.66  
5.64  
5.63  
4.72  
4.72

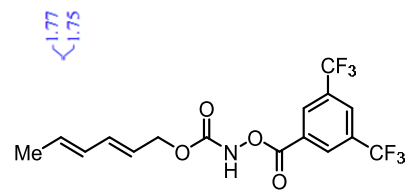

**S8**

(CDCl<sub>3</sub>, 400 MHz)

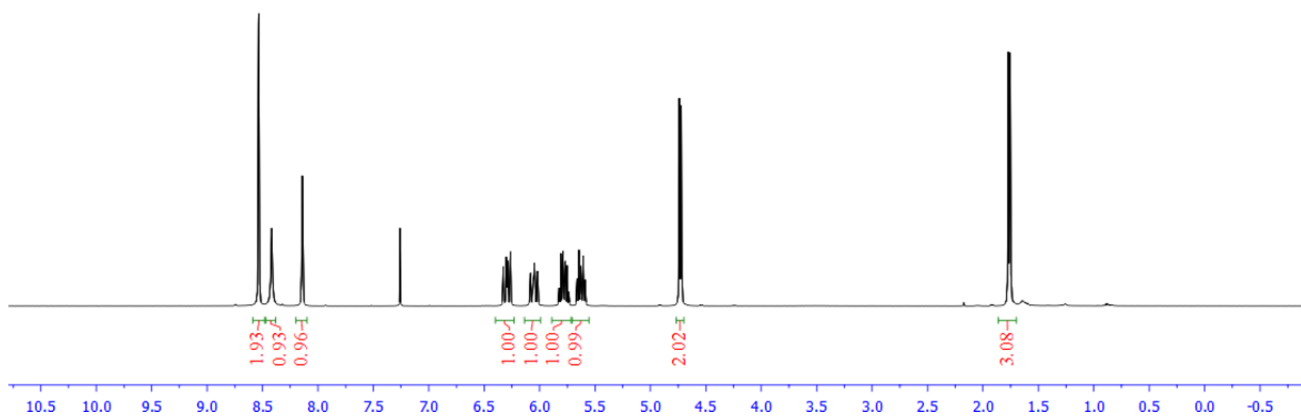

163.39  
156.07  
136.34  
133.18  
132.84  
132.50  
132.41  
132.16  
130.13  
130.07  
129.01  
127.68  
127.65  
127.61  
127.57  
123.96  
122.19  
121.25

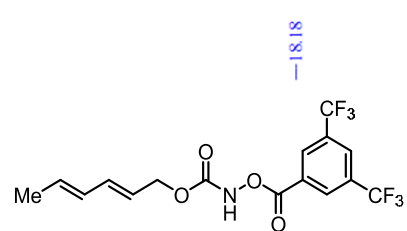

**S8**

(CDCl<sub>3</sub>, 100 MHz)

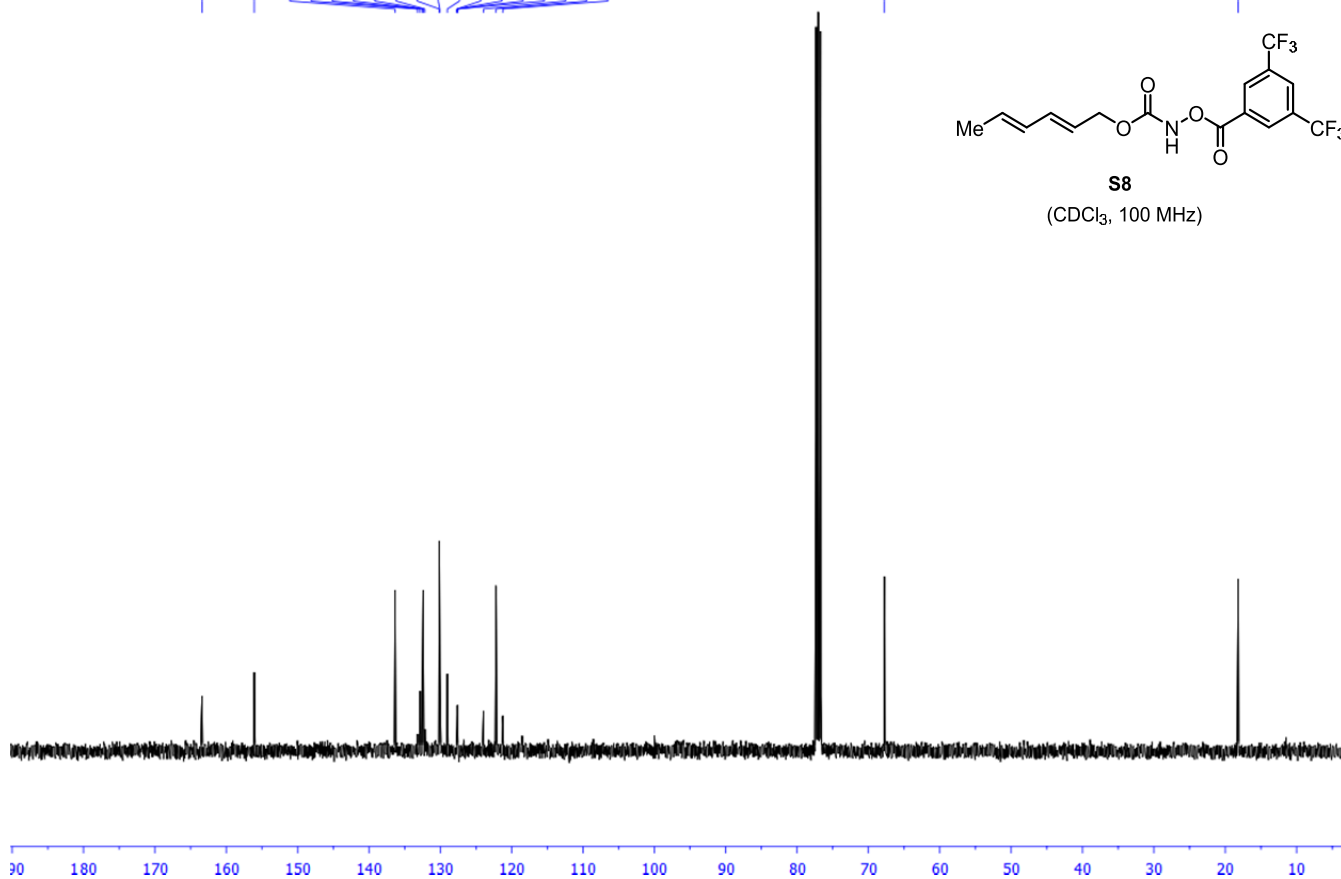

7.28  
7.26  
7.23  
7.21  
4.84  
4.70  
4.68  
4.64  
4.62  
4.62  
4.59  
4.49  
4.48  
4.46  
4.45  
4.28  
4.27  
4.26  
4.25  
4.24  
4.23

—2.37

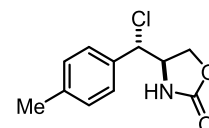

**S9**  
(CDCl<sub>3</sub>, 400 MHz)  
*dr* >20:1

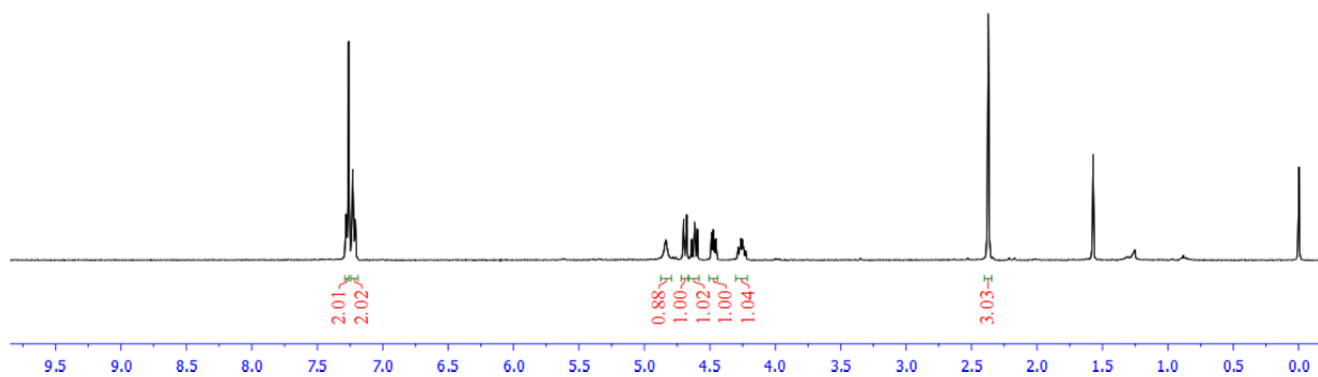

—158.02

—139.87

—133.60

—129.99

—127.57

—68.65

—63.36

—58.26

—21.21

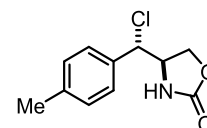

**S9**  
(CDCl<sub>3</sub>, 100 MHz)  
*dr* >20:1

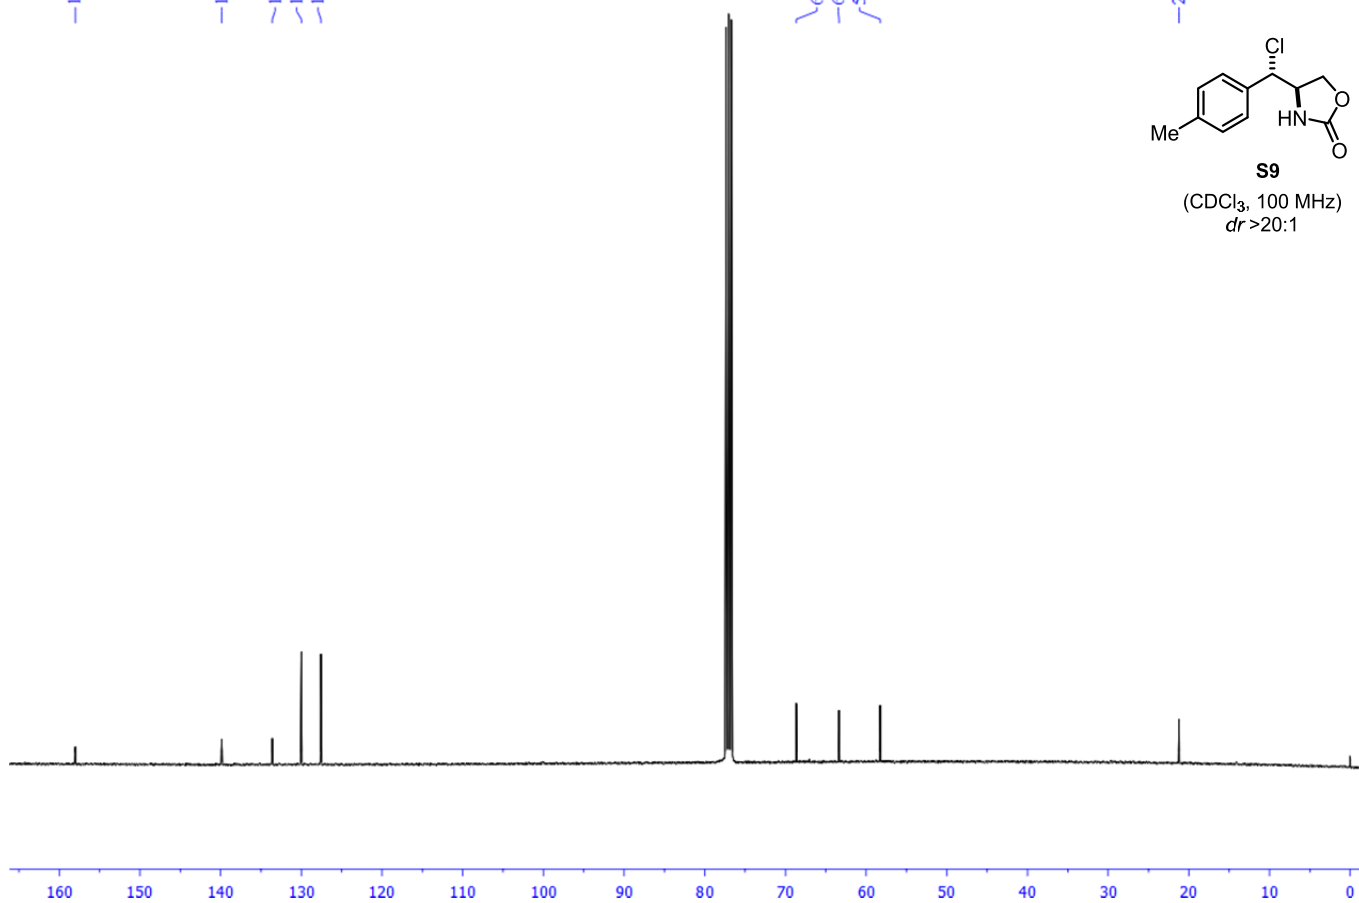

8.07  
8.05

7.48  
7.46

5.58  
4.80  
4.78  
4.60  
4.58  
4.58  
4.56  
4.47  
4.46  
4.45  
4.44  
4.30  
4.29  
4.29  
4.28  
4.28  
4.27  
4.26  
4.26  
4.25  
4.24  
3.92

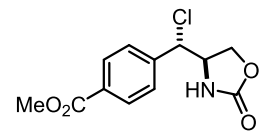

**S10**

(CDCl<sub>3</sub>, 400 MHz)  
*dr* >20:1

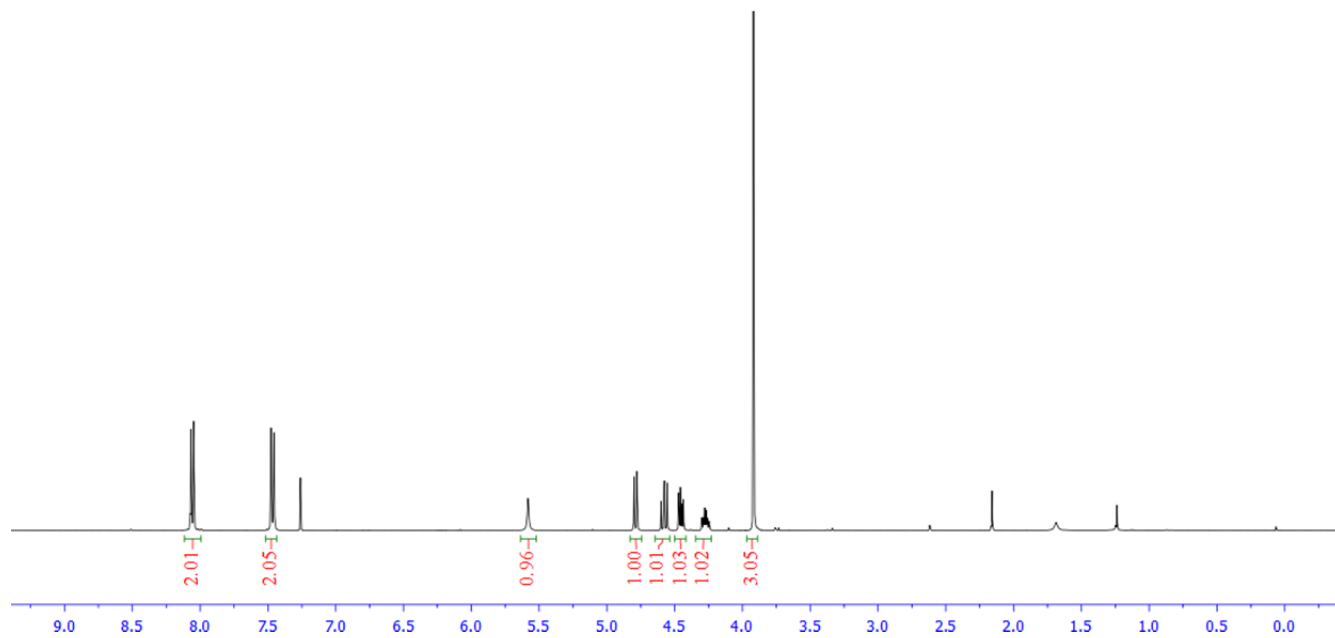

166.17

158.37

141.22

131.25

130.42

127.80

68.22

62.79

58.15

52.41

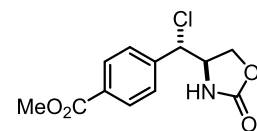

**S10**

(CDCl<sub>3</sub>, 100 MHz)  
*dr* >20:1

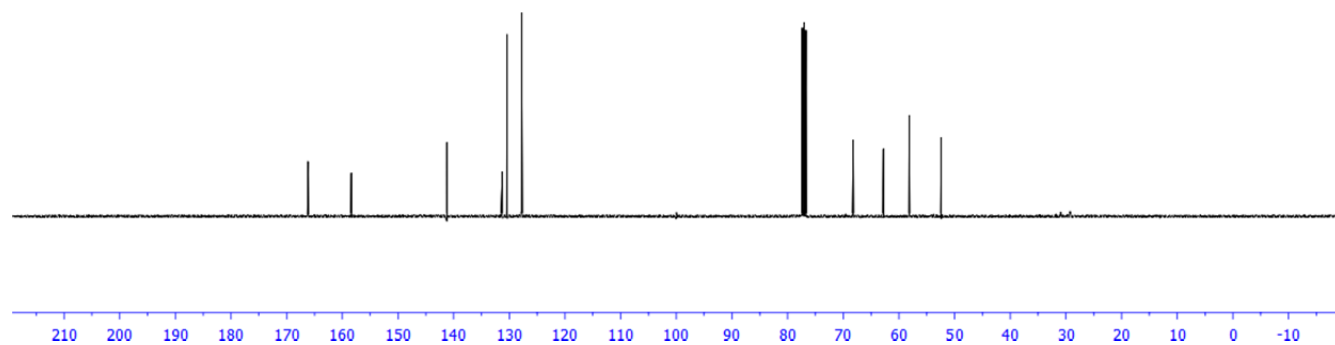

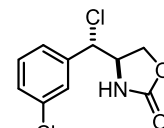

**S11**

(CDCl<sub>3</sub>, 400 MHz)  
dr >20:1

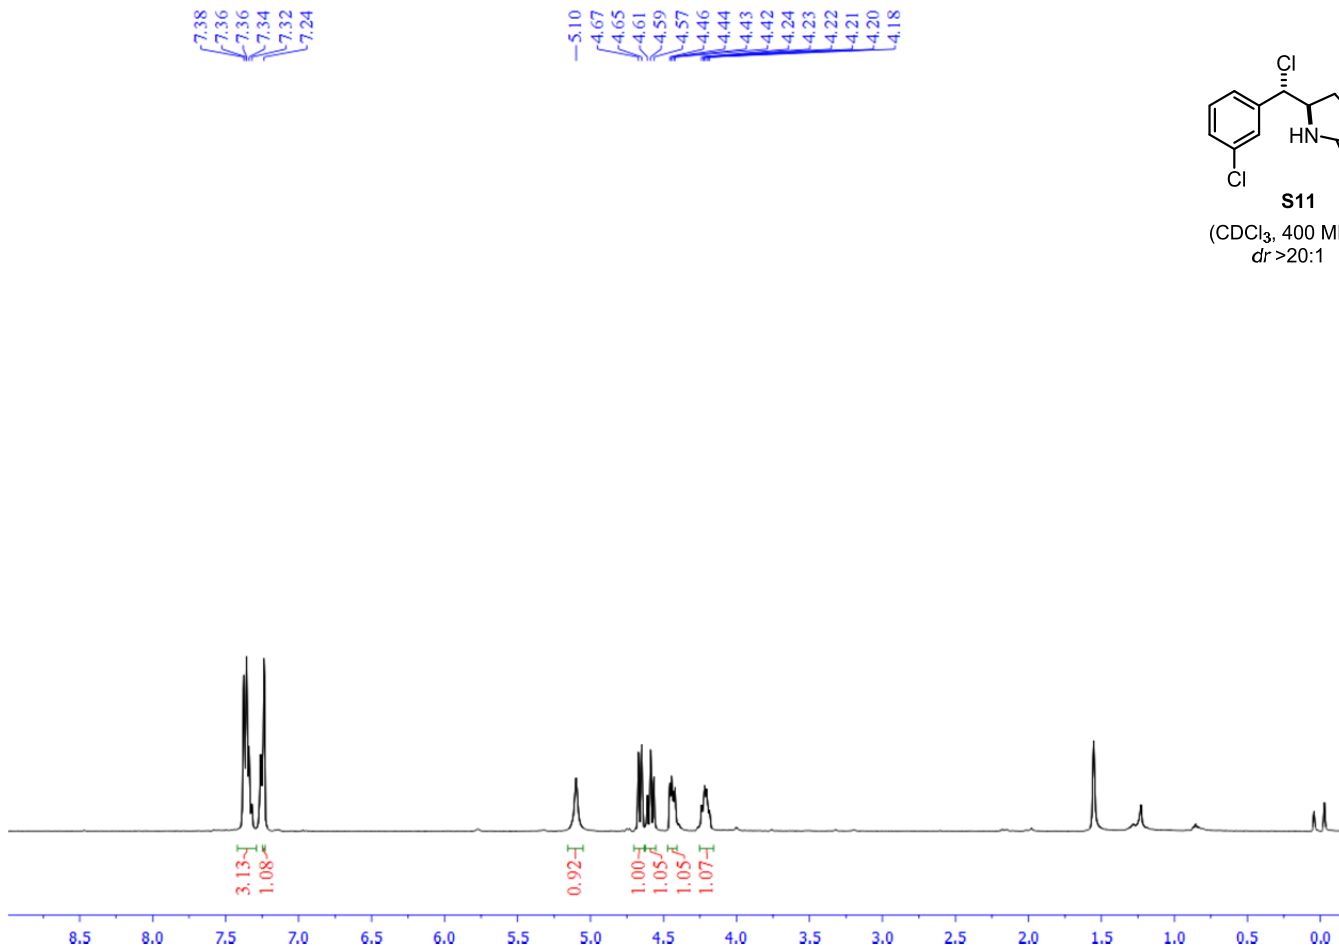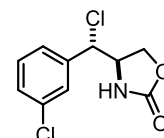

**S11**

(CDCl<sub>3</sub>, 100 MHz)  
dr >20:1

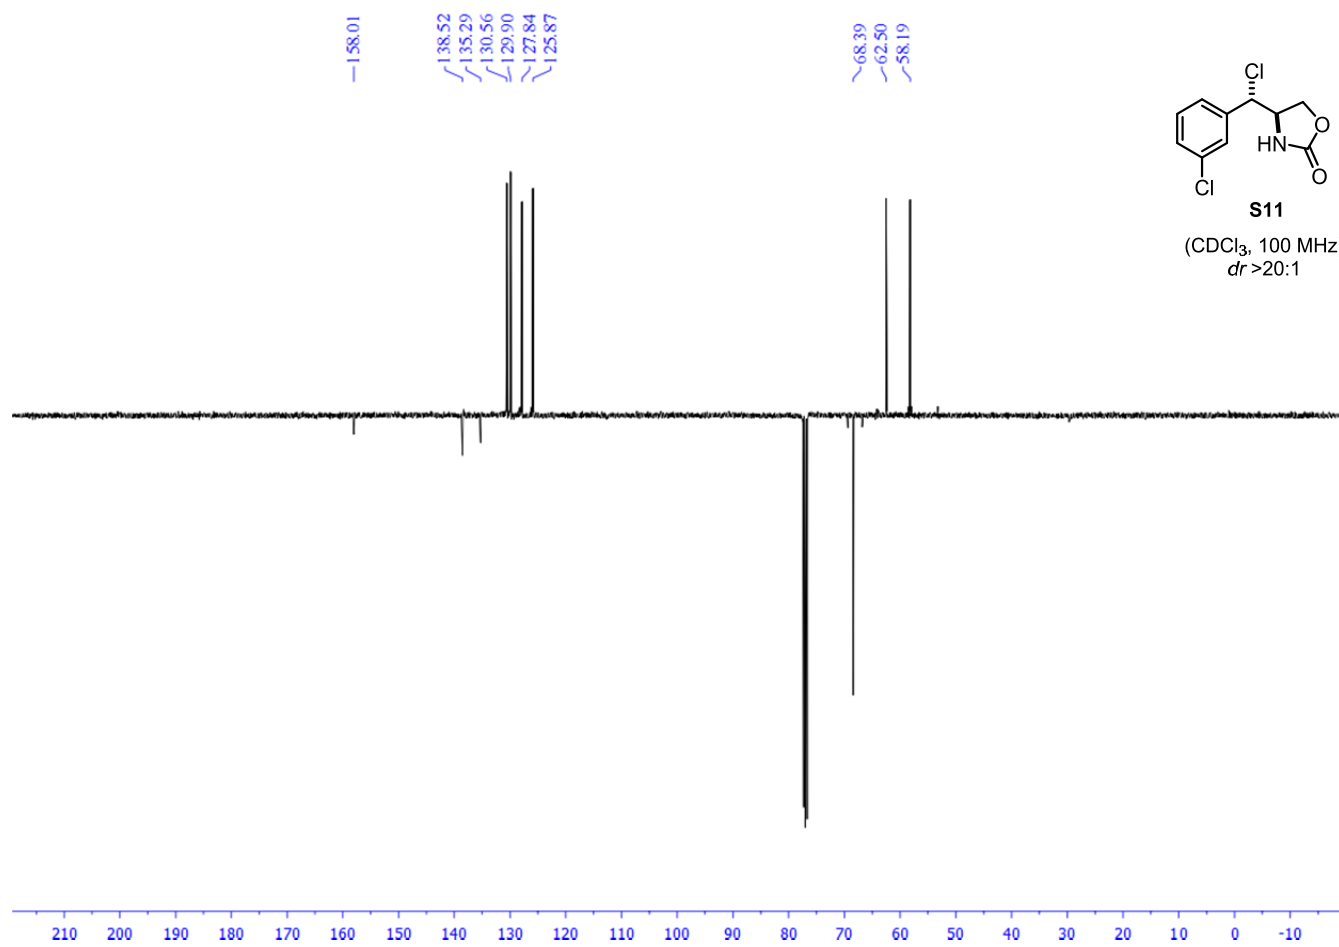

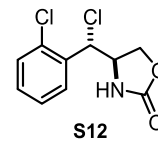

**S12**

(CDCl<sub>3</sub>, 400 MHz)  
dr >20:1

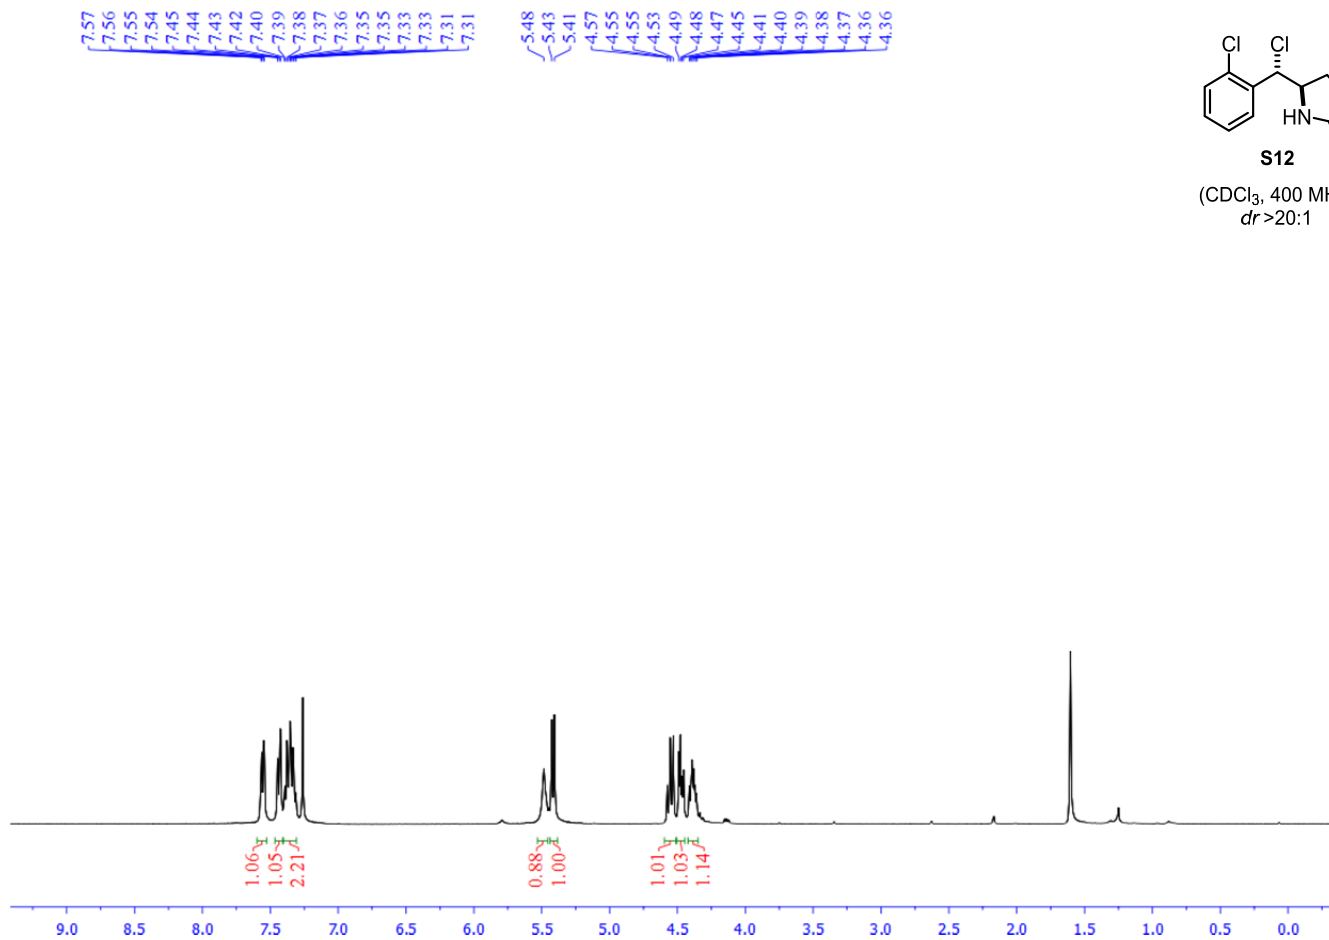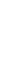

**S12**

(CDCl<sub>3</sub>, 100 MHz)  
dr >20:1

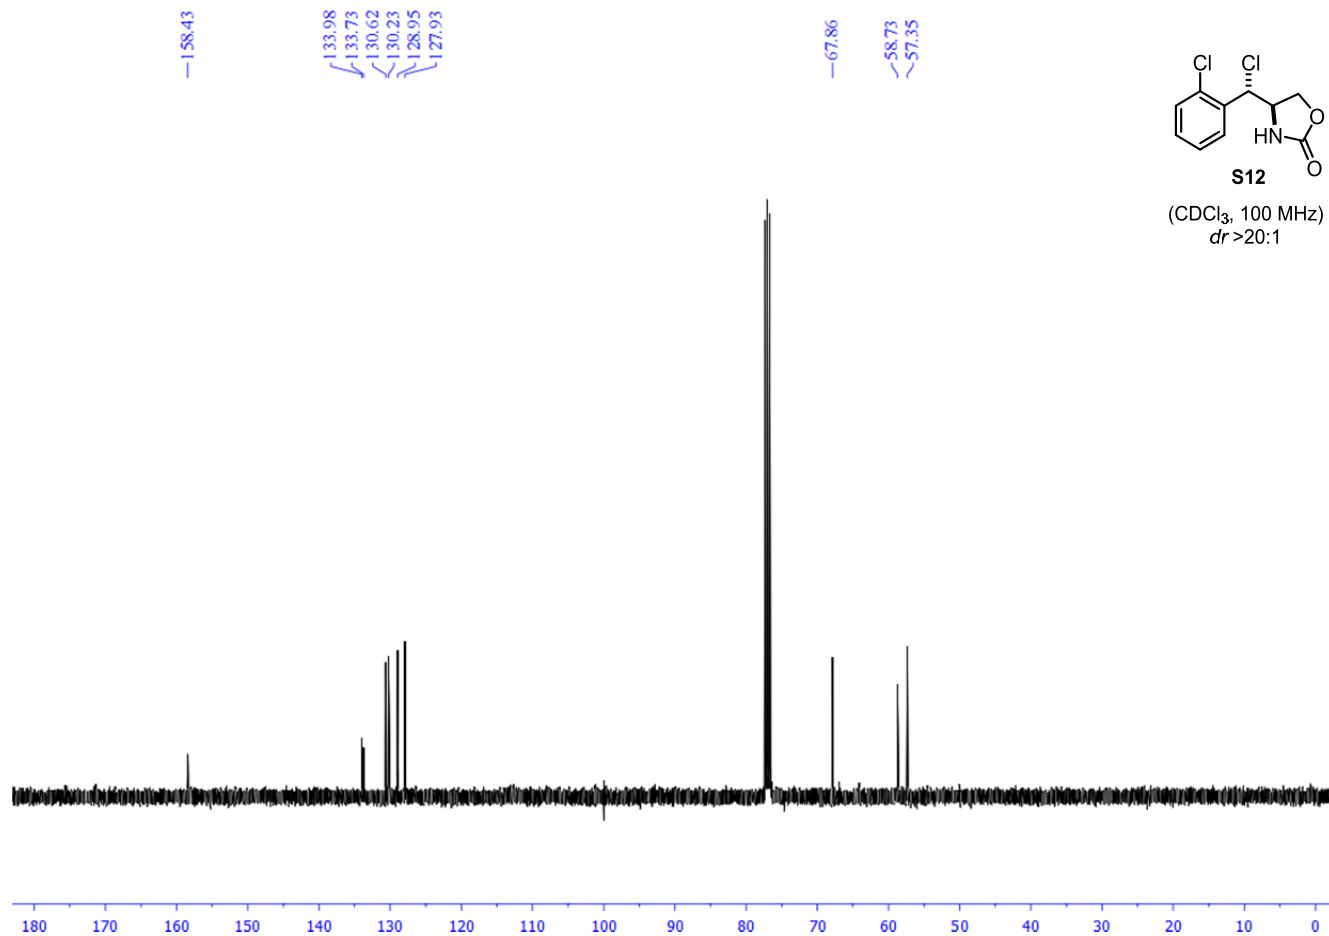

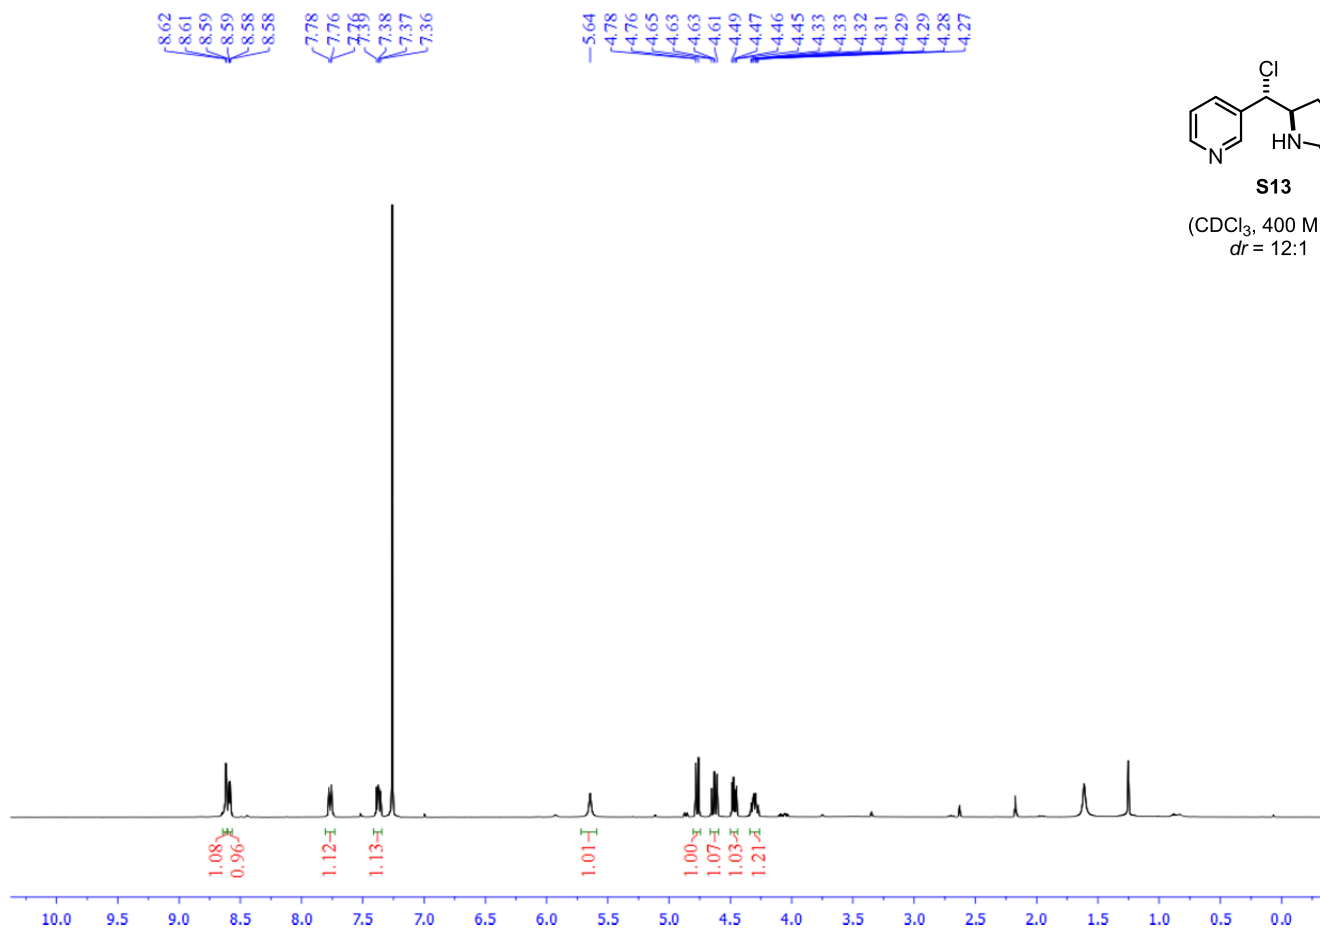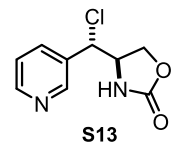

(CDCl<sub>3</sub>, 400 MHz)  
dr = 12:1

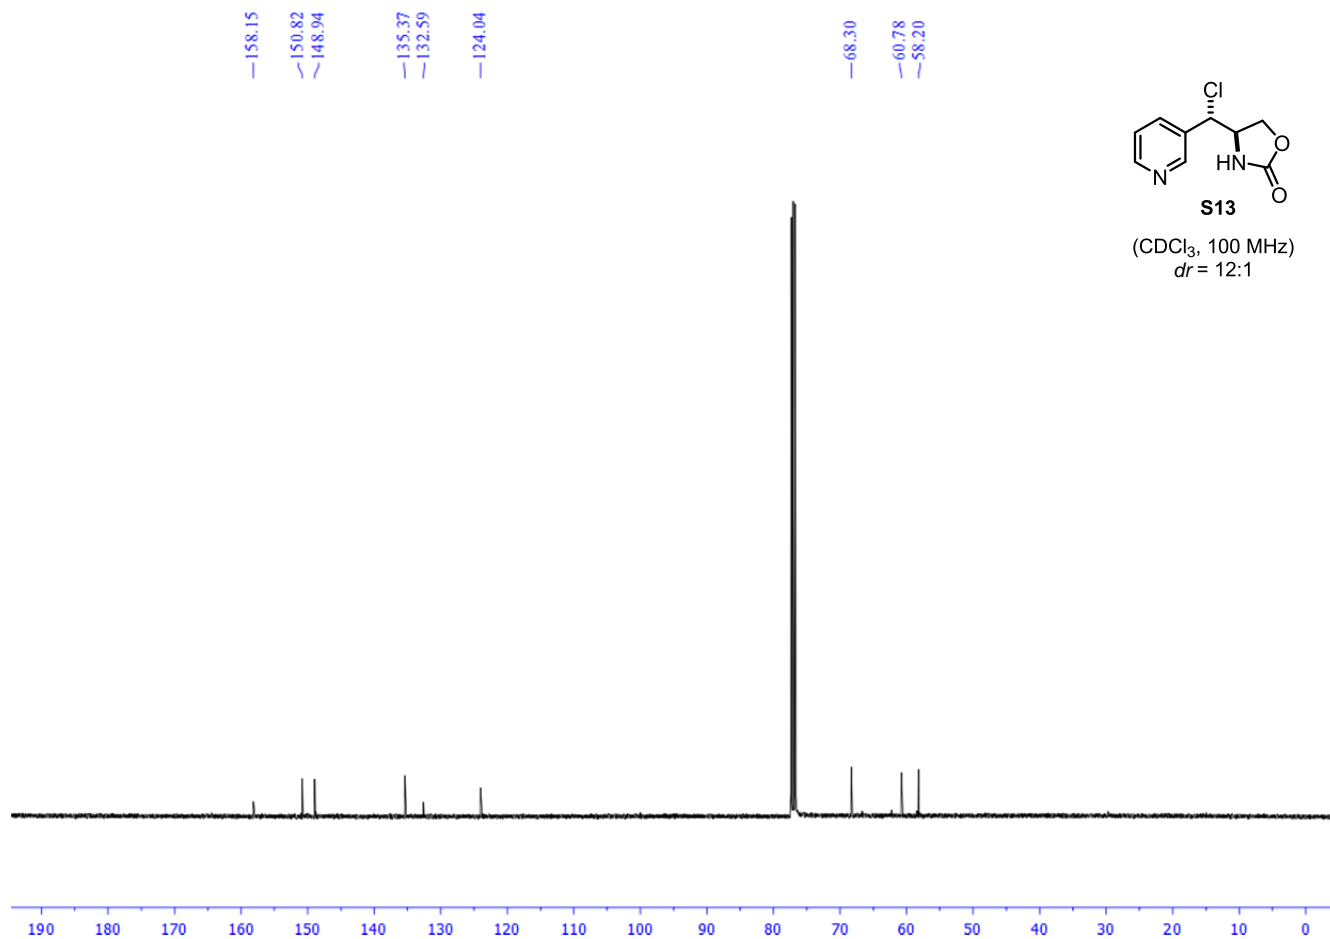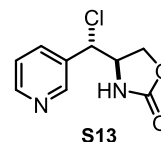

(CDCl<sub>3</sub>, 100 MHz)  
dr = 12:1

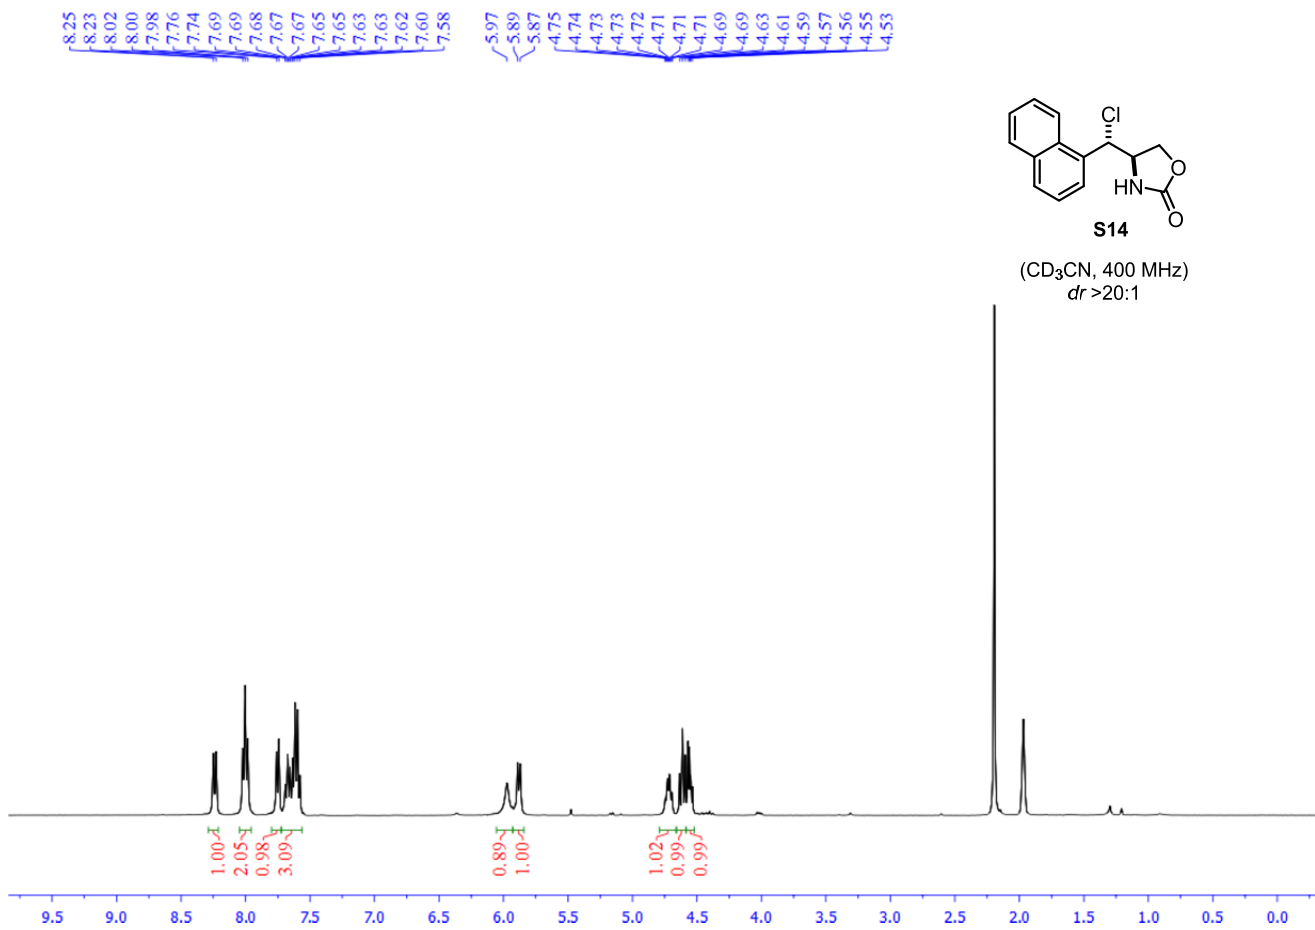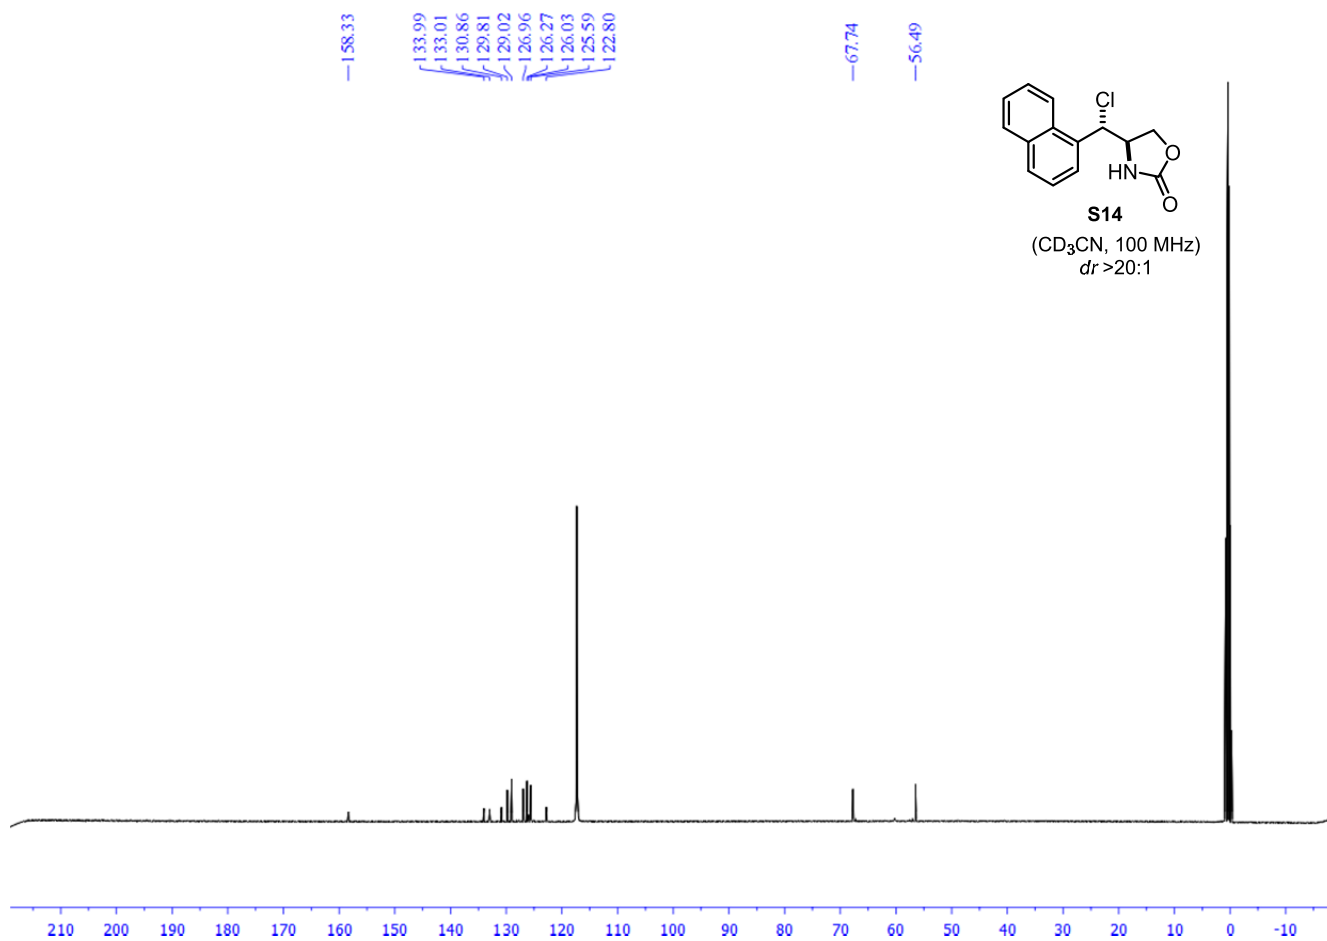

7.94  
7.91  
7.89  
7.88  
7.87  
7.86  
7.86  
7.85  
7.83  
7.58  
7.58  
7.57  
7.56  
7.55  
7.54  
7.51  
7.51  
7.49  
7.49  
4.90  
4.87  
4.77  
4.69  
4.67  
4.67  
4.65  
4.57  
4.56  
4.55  
4.54  
4.54  
4.40  
4.40  
4.39  
4.39  
4.38  
4.38  
4.38  
4.37  
4.36  
4.36  
4.35  
4.34

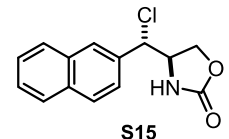

**S15**

(CDCl<sub>3</sub>, 400 MHz)  
dr >20:1

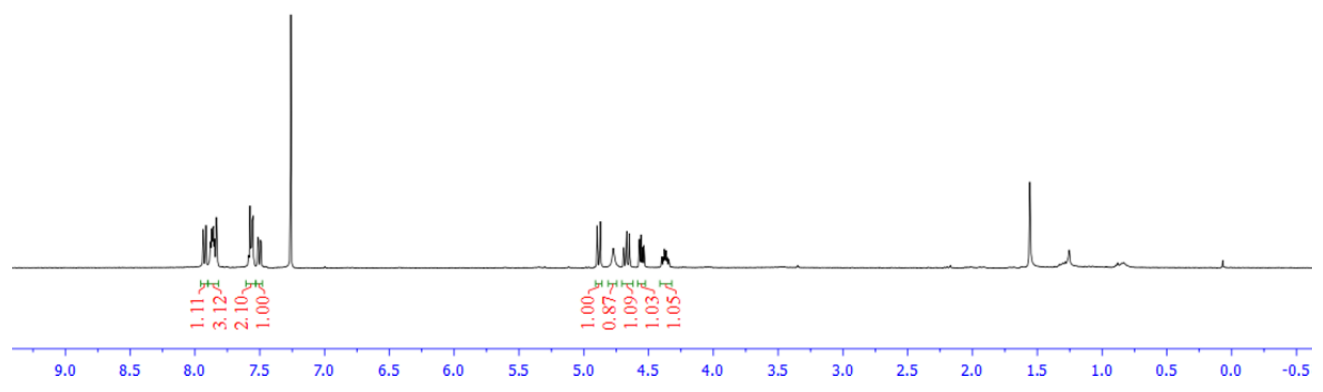

157.95  
133.67  
133.62  
132.88  
129.66  
128.14  
127.83  
127.70  
127.31  
127.15  
123.96

68.63  
63.78  
58.15

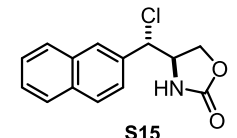

**S15**

(CDCl<sub>3</sub>, 100 MHz)  
dr >20:1

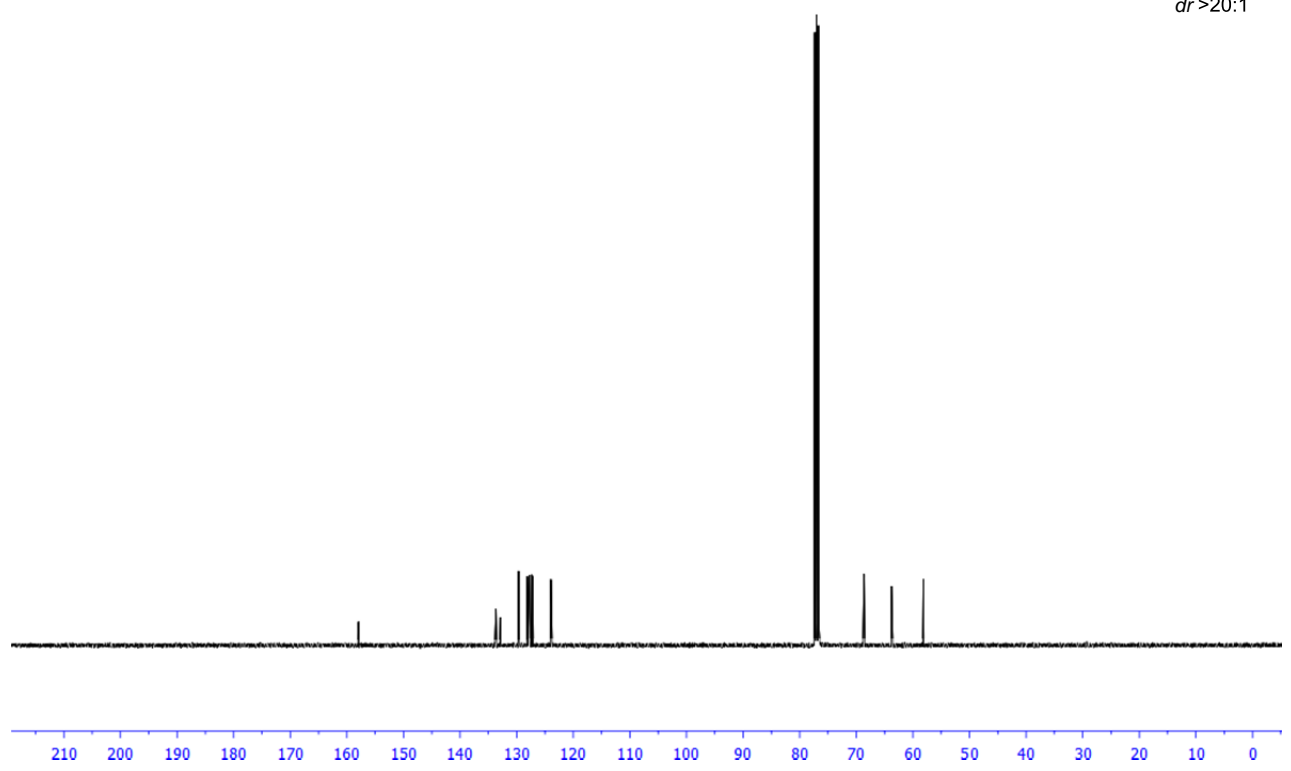



7.47  
7.47  
7.46  
7.46  
7.45  
7.45  
7.39  
7.37  
7.37  
7.36  
7.36  
7.35  
7.34  
7.34  
7.32  
5.83  
4.76  
4.75  
4.62  
4.60  
4.60  
4.58  
4.54  
4.53  
4.52  
4.51  
4.25  
4.25  
4.24  
4.24  
4.23  
4.23  
4.23  
4.22  
4.22  
4.22  
4.21  
4.21  
4.20  
4.20

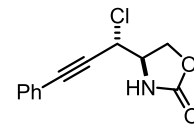

**S16**  
(CDCl<sub>3</sub>, 400 MHz)  
*dr*:7:1

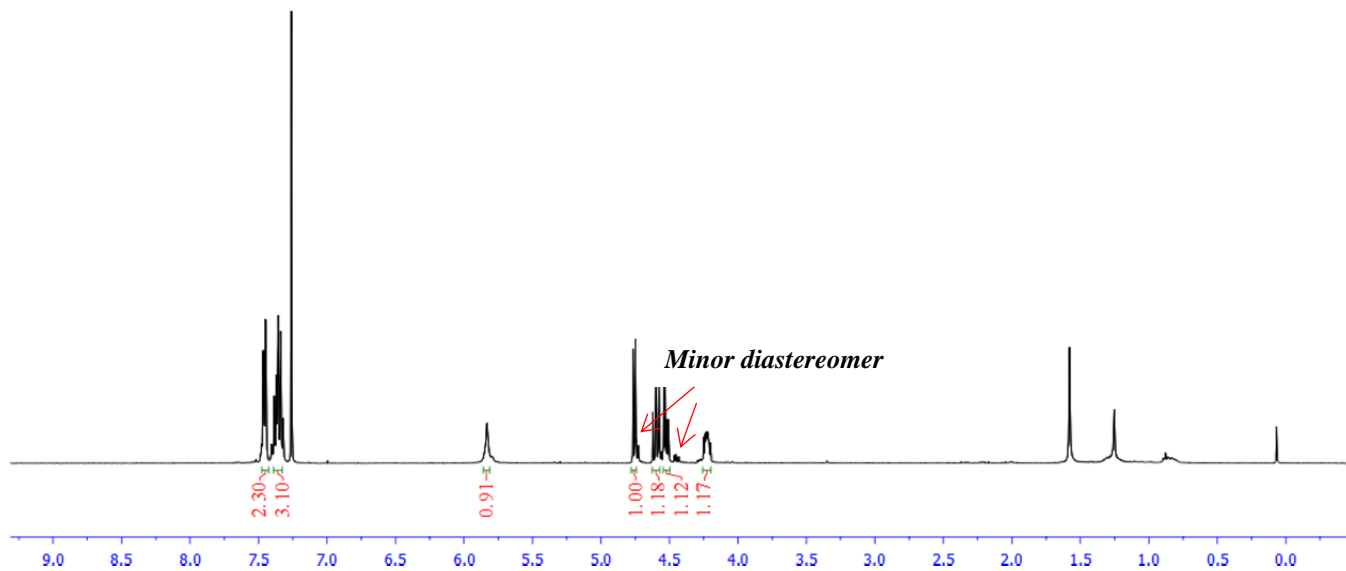

158.34  
132.03  
129.59  
128.49  
120.81  
88.88  
81.78  
67.08  
57.57  
50.95

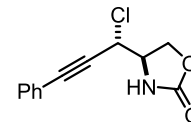

**S16**  
(CDCl<sub>3</sub>, 100 MHz)  
*dr*:7:1

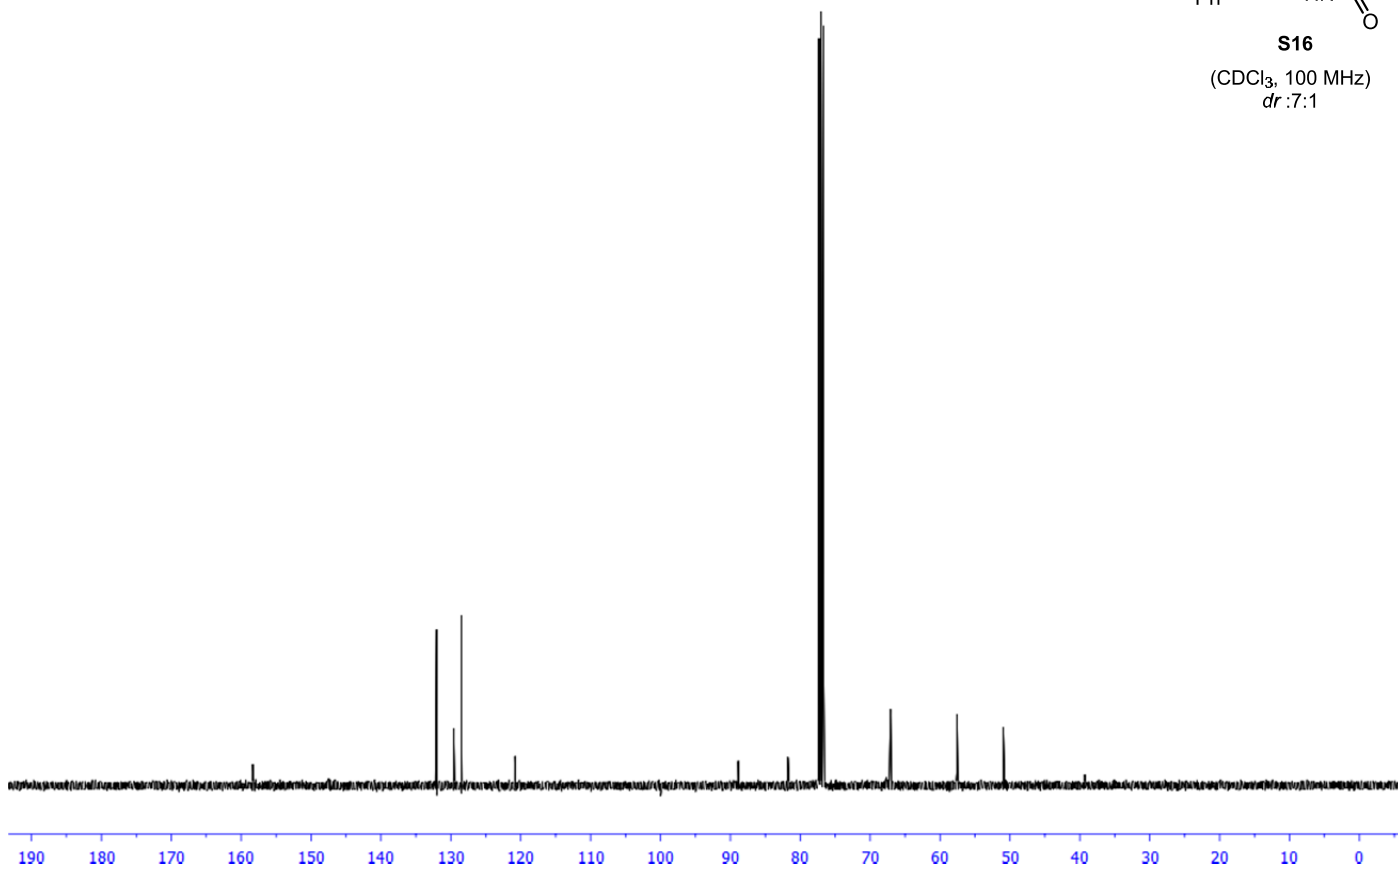

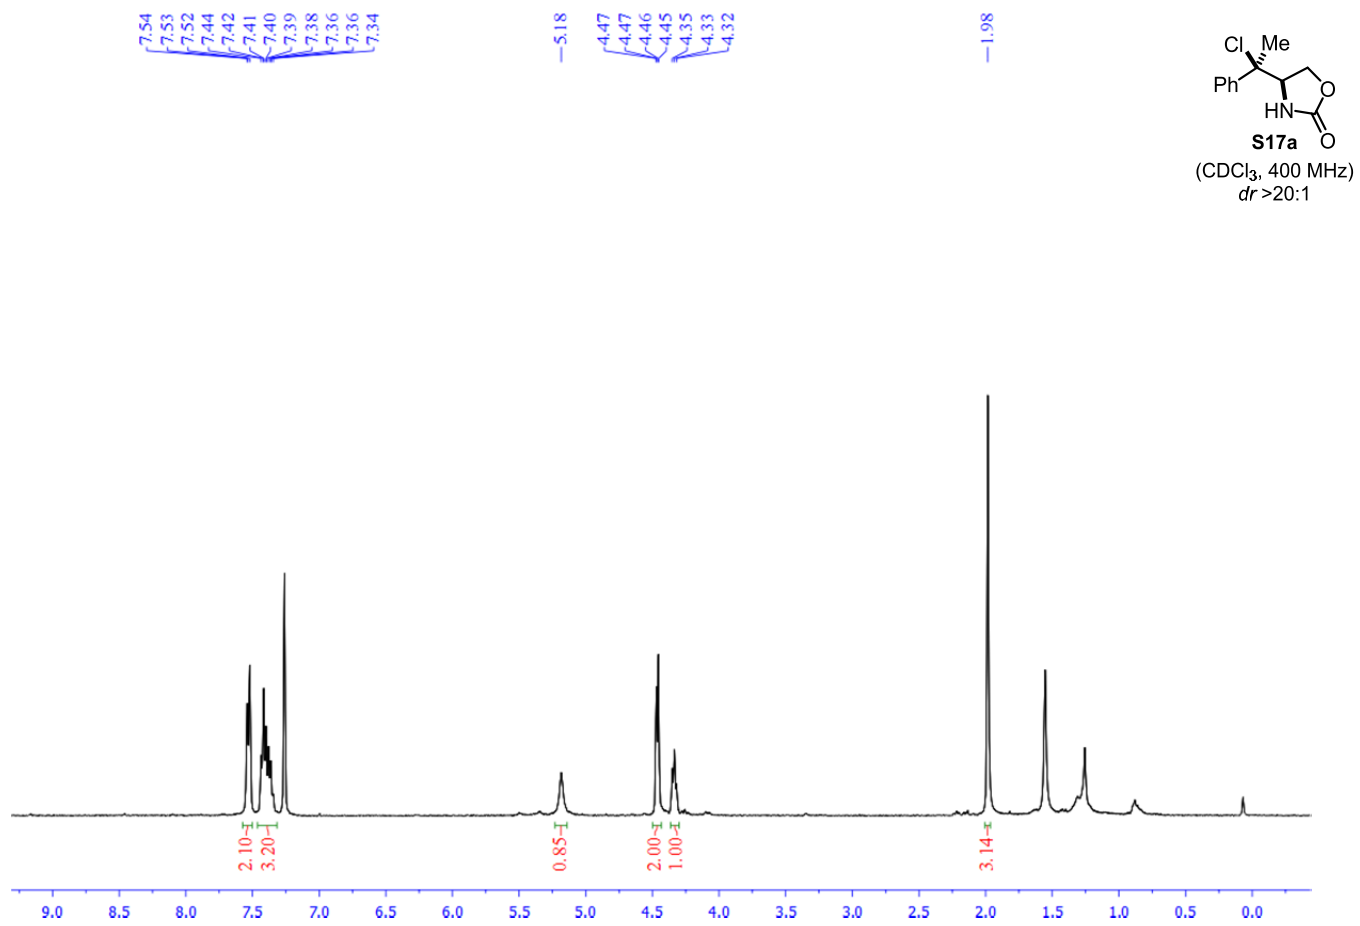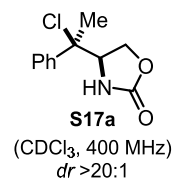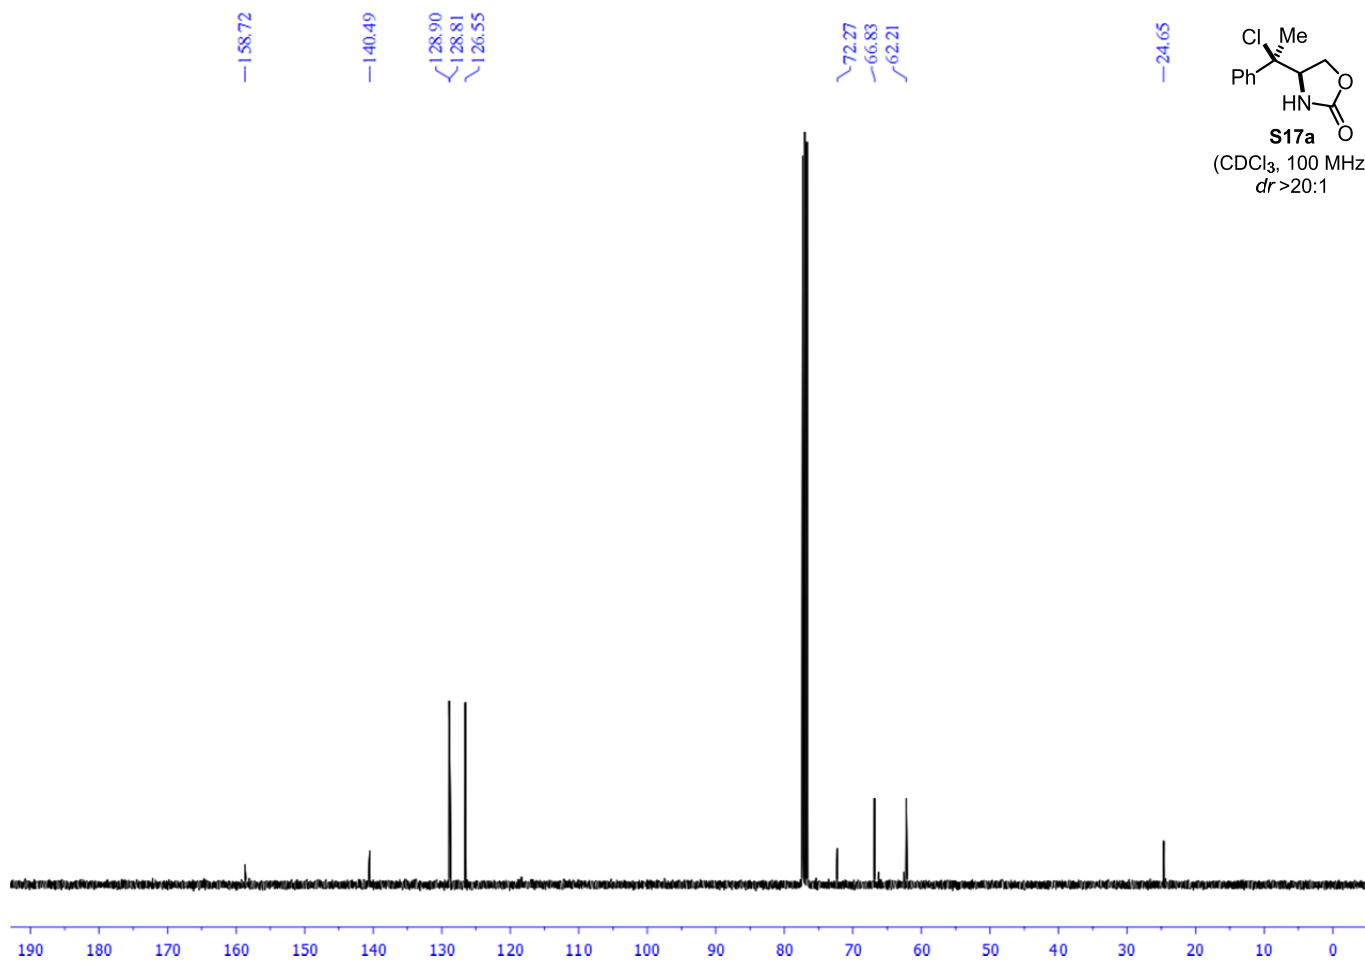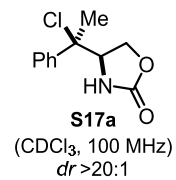

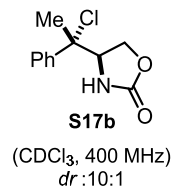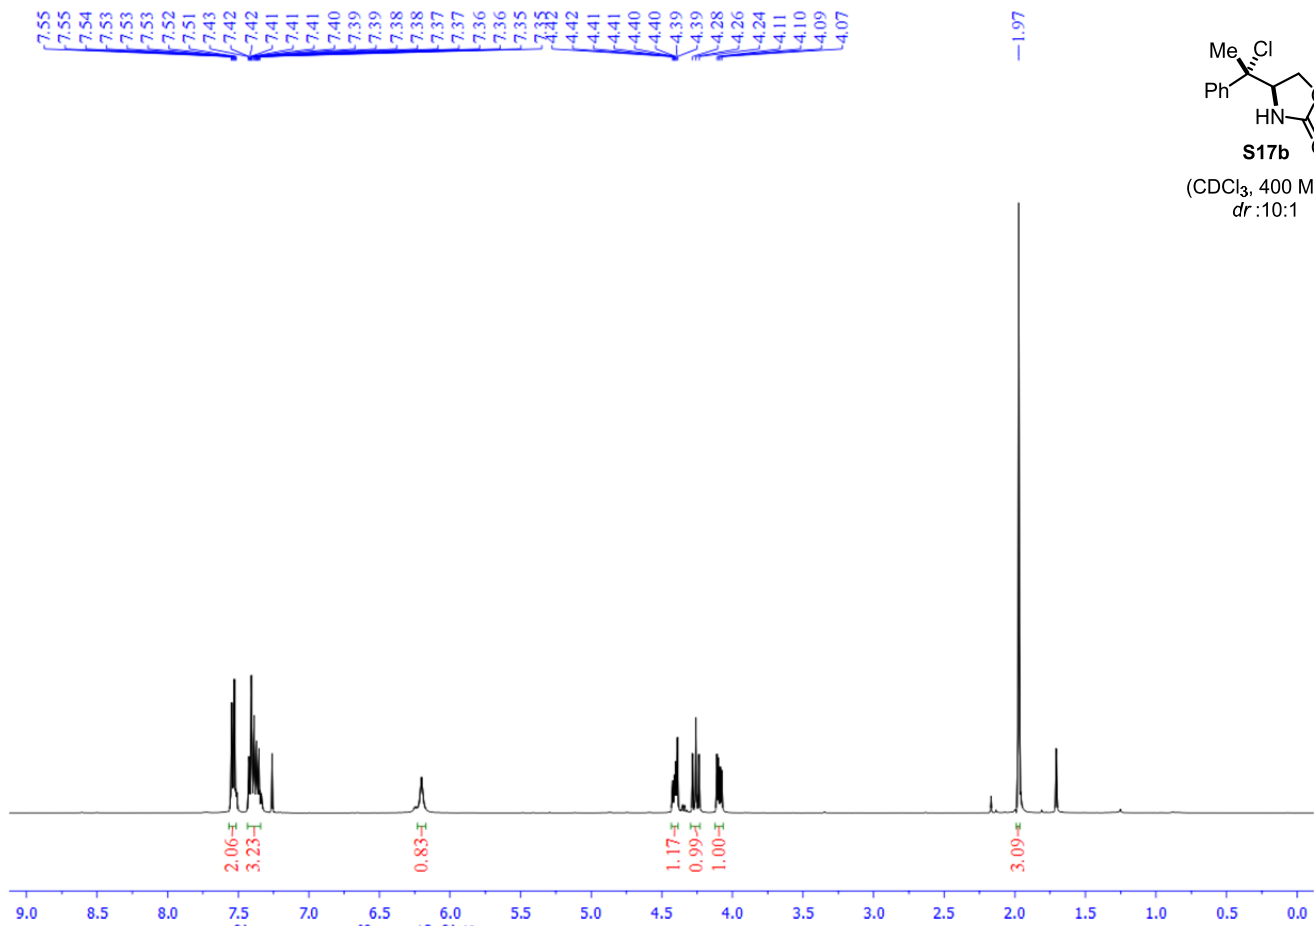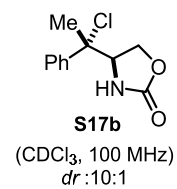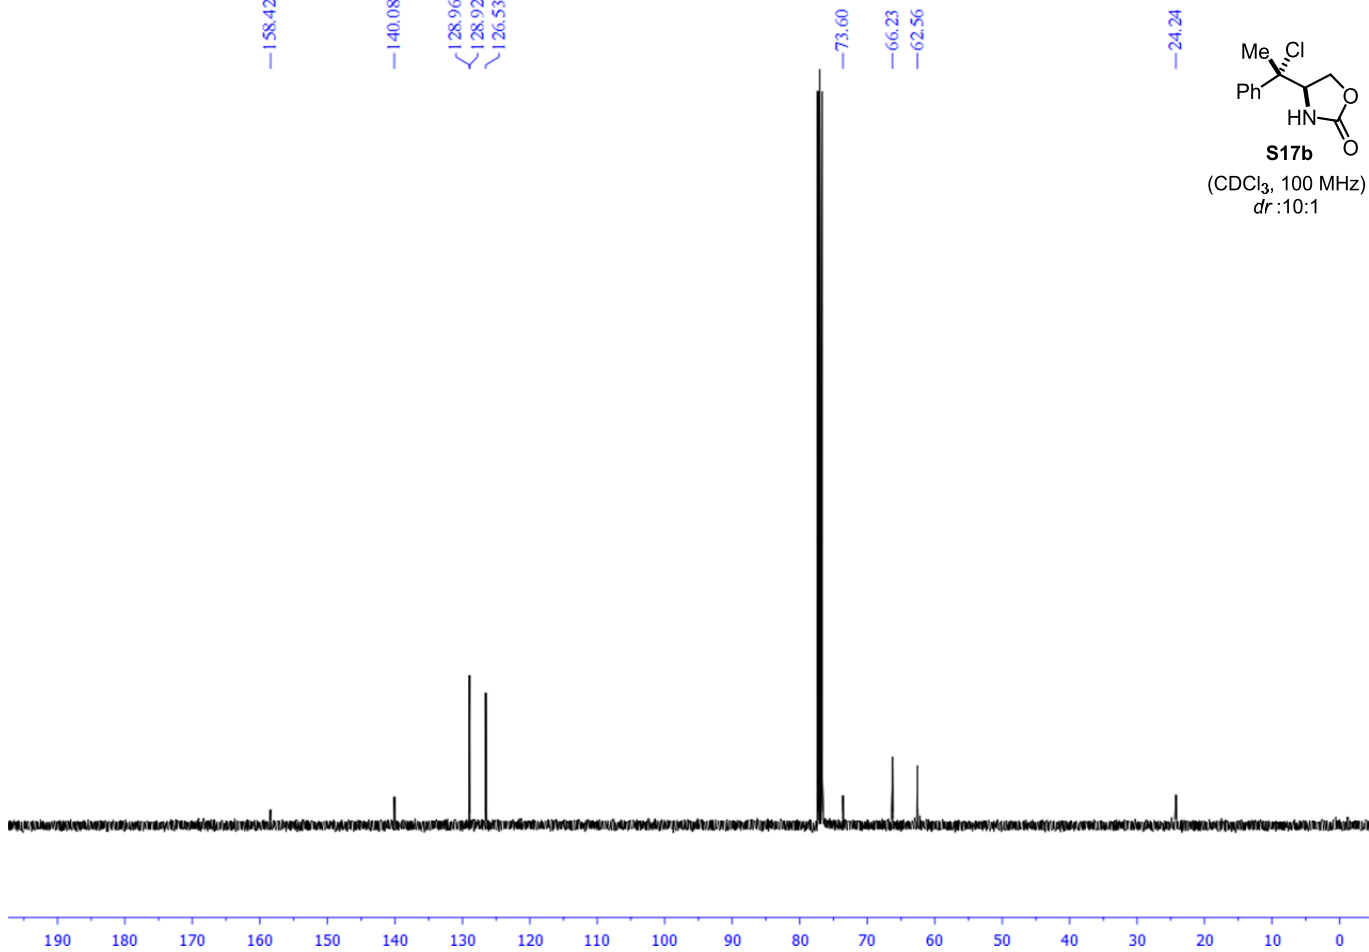

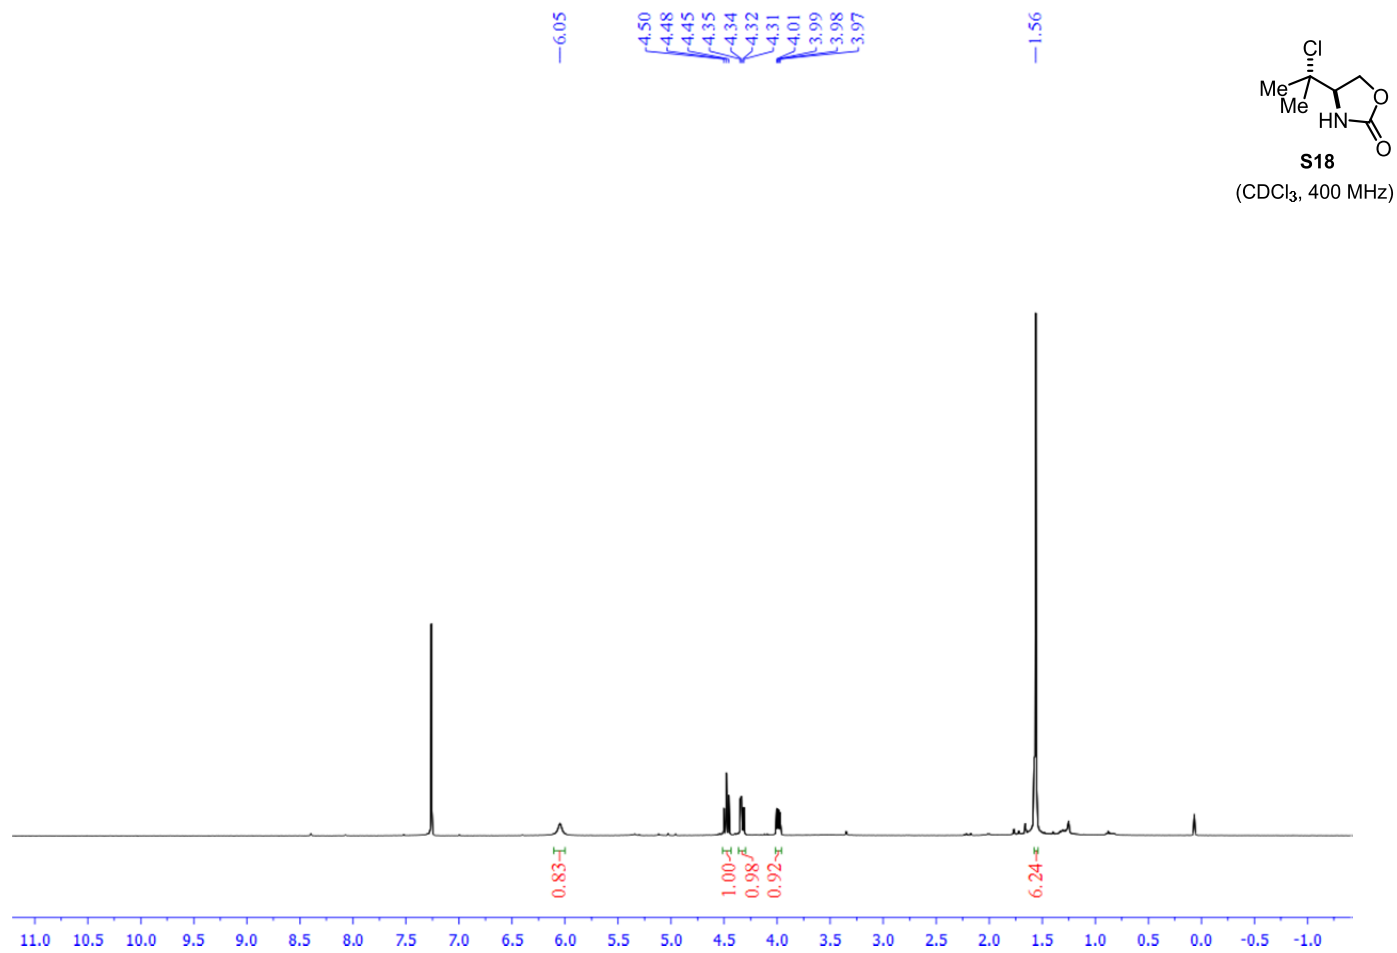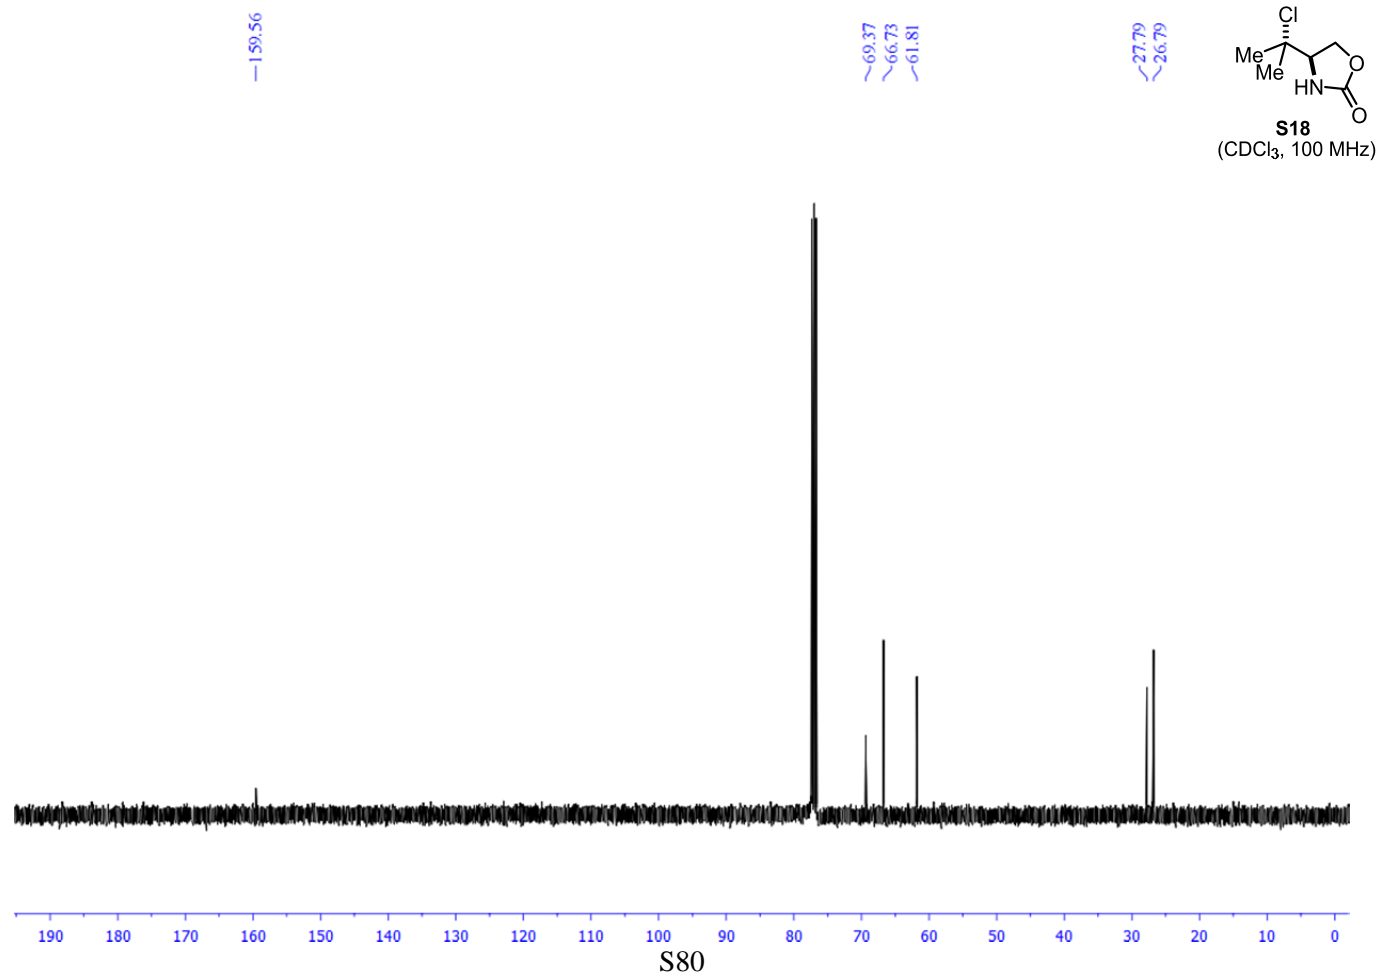

7.16  
4.54  
4.52  
4.50  
4.36  
4.35  
4.34  
4.32  
4.13  
4.12  
4.11  
4.10  
3.78  
3.77  
3.76  
3.75  
1.80  
1.79  
1.78  
1.77  
1.76  
1.75  
1.74  
1.74  
1.74  
1.72  
1.72  
1.69  
1.68  
1.68  
1.67  
1.66  
1.65  
1.65  
1.64  
1.64  
1.58  
1.57  
1.56  
1.55  
1.54  
1.40  
1.39  
1.37  
1.36  
1.34  
1.33  
1.33  
1.32  
1.31  
1.30  
1.29  
1.29  
1.28  
1.27  
1.26  
1.26  
1.25  
1.24  
1.22  
1.21  
1.18  
1.15  
1.14  
1.12

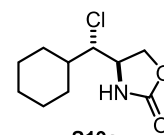

**S19a**

(CDCl<sub>3</sub>, 400 MHz)

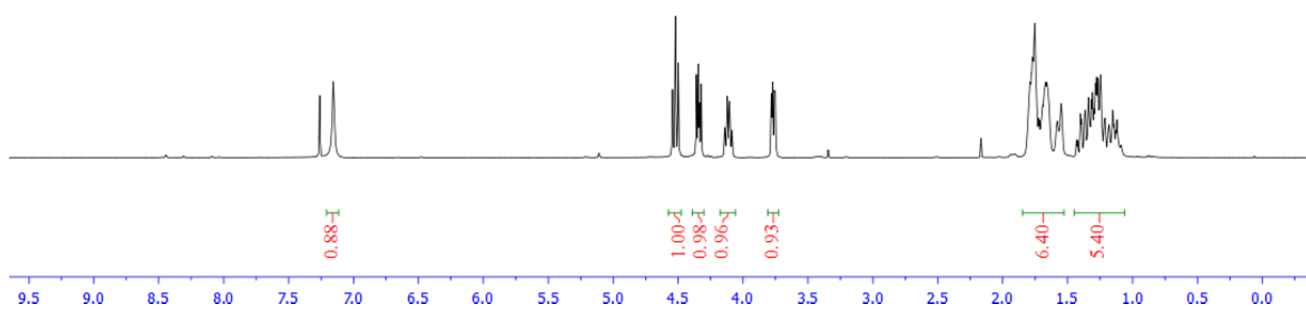

—160.10

69.74  
68.89

—54.54

—39.77

30.74

26.17

25.98

25.96

25.49

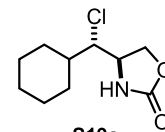

**S19a**

(CDCl<sub>3</sub>, 100 MHz)

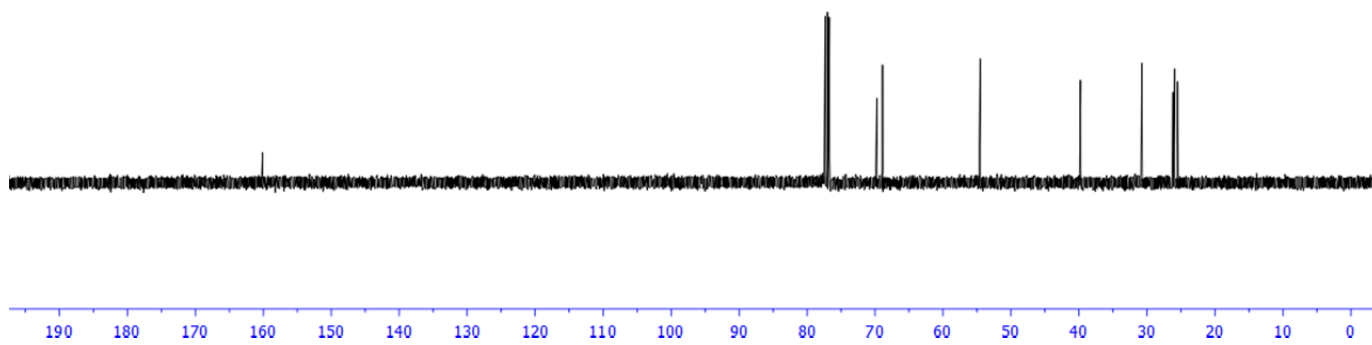

6.04, 4.51, 4.49, 4.48, 4.47, 4.46, 4.23, 4.21, 4.20, 4.19, 4.17, 3.74, 3.73, 3.71, 1.80, 1.79, 1.79, 1.78, 1.77, 1.75, 1.70, 1.68, 1.66, 1.63, 1.59, 1.58, 1.58, 1.33, 1.32, 1.31, 1.30, 1.28, 1.27, 1.25, 1.25, 1.23, 1.22, 1.21, 1.20, 1.19

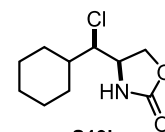

**S19b**

(CDCl<sub>3</sub>, 400 MHz)

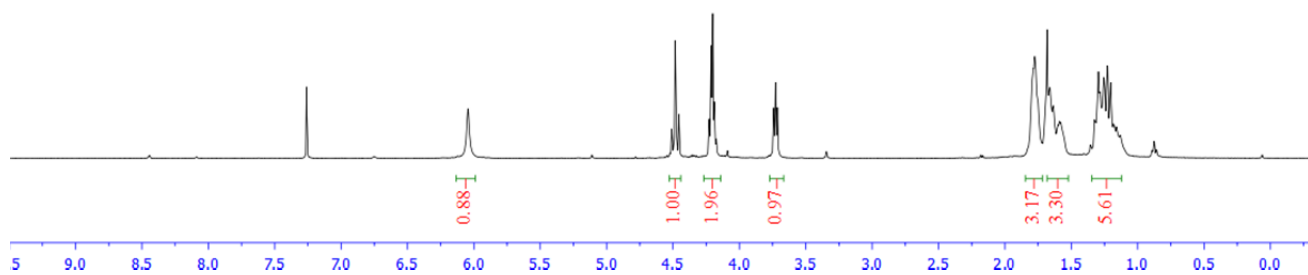

158.88

70.48, 67.55

54.96

40.56, 30.70, 27.94, 25.90, 25.88, 25.65

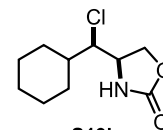

**S19b**

(CDCl<sub>3</sub>, 100 MHz)

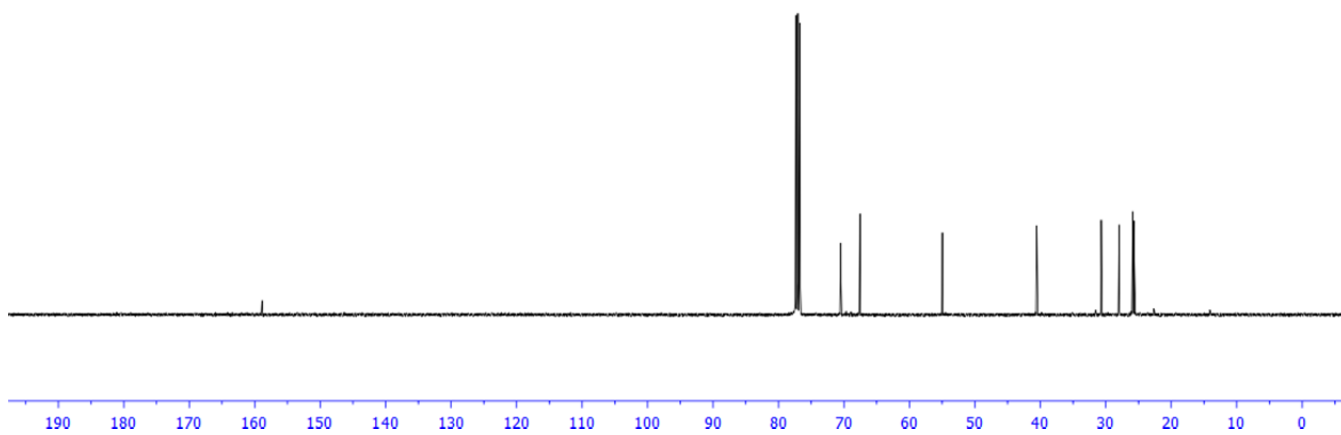

7.46  
7.45  
7.44  
7.44  
7.42  
7.39  
7.39  
7.38  
7.38  
7.37  
7.36  
7.32  
7.31  
7.31  
7.30  
-6.50

4.67  
4.65  
4.46  
4.43  
3.95  
3.92  
3.90  
3.87

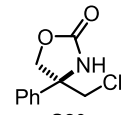

**S20**  
(CDCl<sub>3</sub>, 400 MHz)

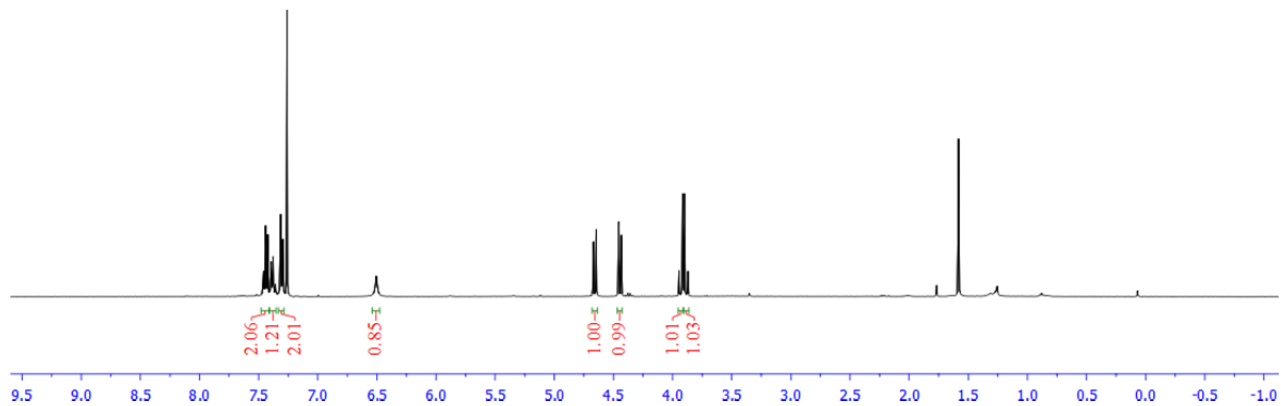

158.88

139.62

129.27

128.72

124.90

74.11

64.07

51.31

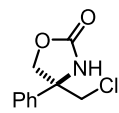

**S20**  
(CDCl<sub>3</sub>, 100 MHz)

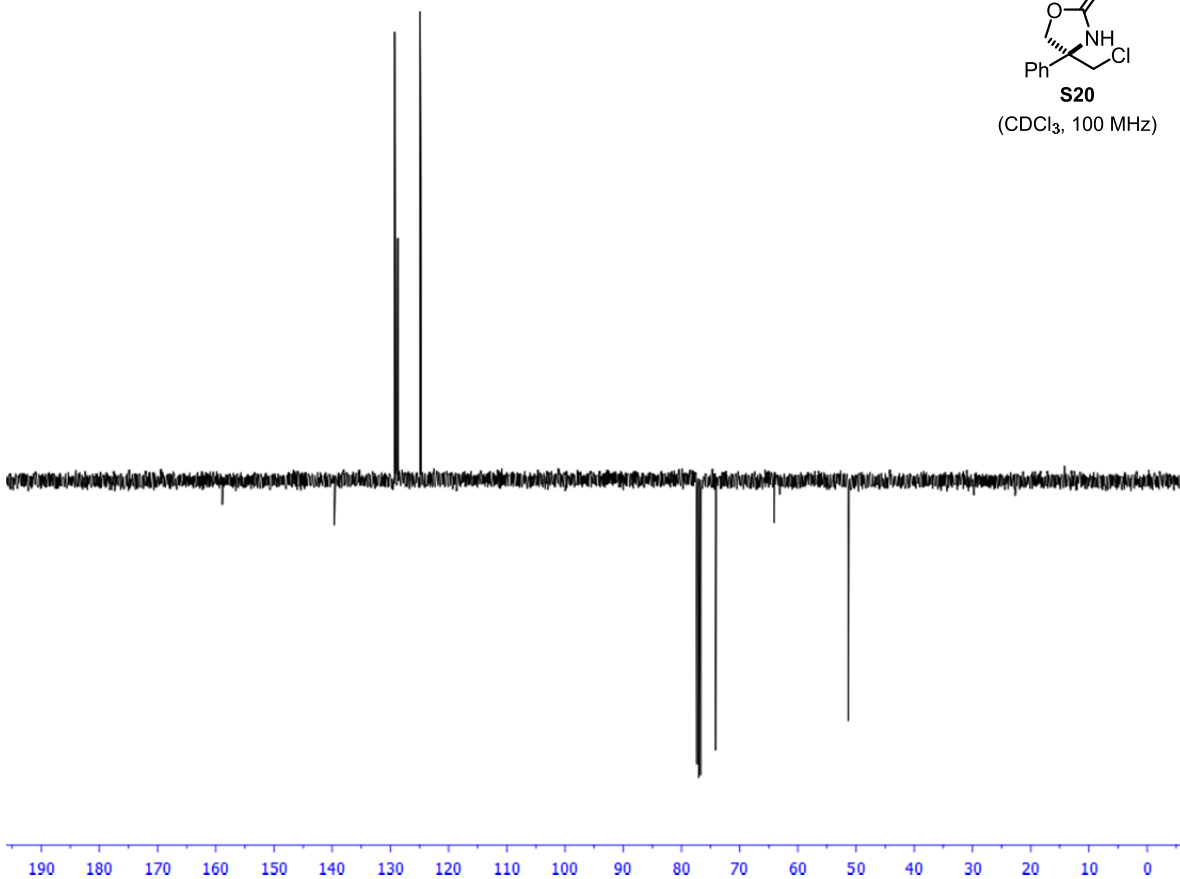

5.94  
5.94  
5.93  
5.93  
5.93  
5.92  
5.91  
5.91  
5.90  
5.89  
5.89  
5.88  
5.88  
5.49  
5.48  
5.46  
5.46  
5.45  
5.44  
5.43  
5.42  
4.53  
4.51  
4.50  
4.48  
4.44  
4.42  
4.42  
4.39  
4.34  
4.32  
4.32  
4.31  
4.30  
4.30  
4.25  
4.23  
4.23  
4.21  
4.20  
4.20  
4.19  
4.18  
4.17  
4.02  
4.02  
4.01  
4.01  
4.00  
4.00  
4.00  
3.99  
3.99  
3.98  
3.98  
1.78  
1.78  
1.77  
1.77  
1.76  
1.76

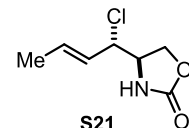

(CDCl<sub>3</sub>, 400 MHz)  
dr: 1.5 : 1

— minor diastereomer  
— major diastereomer

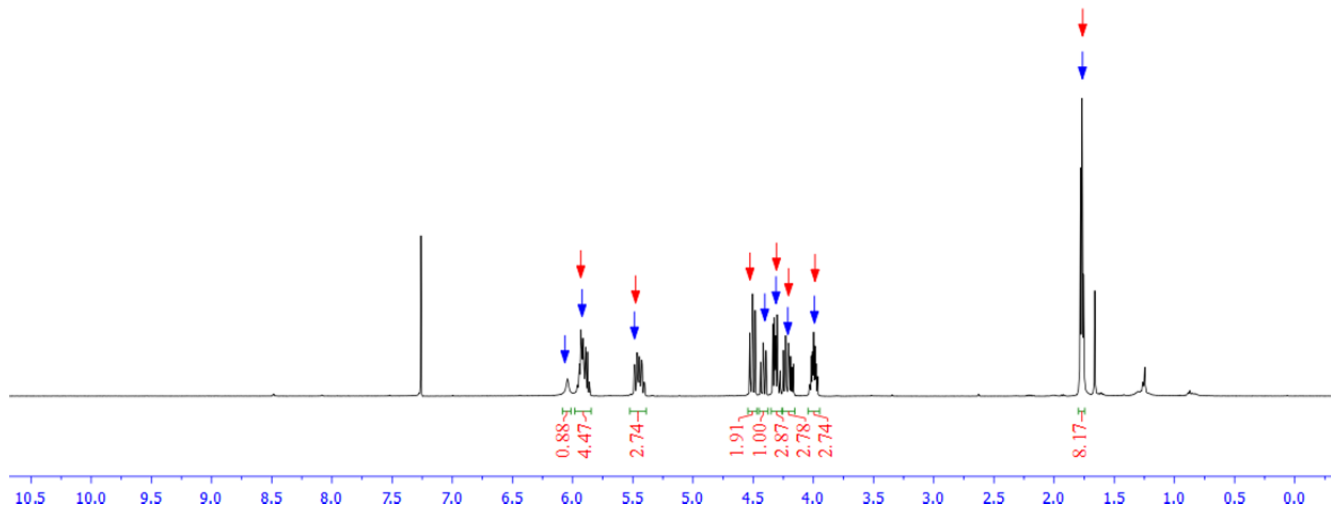

159.08  
158.94  
133.87  
133.85  
126.37  
125.67  
67.84  
66.90  
64.30  
63.48  
57.34  
57.09  
17.87  
17.81

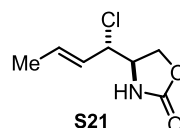

(CDCl<sub>3</sub>, 100 MHz)  
dr: 1.5:1

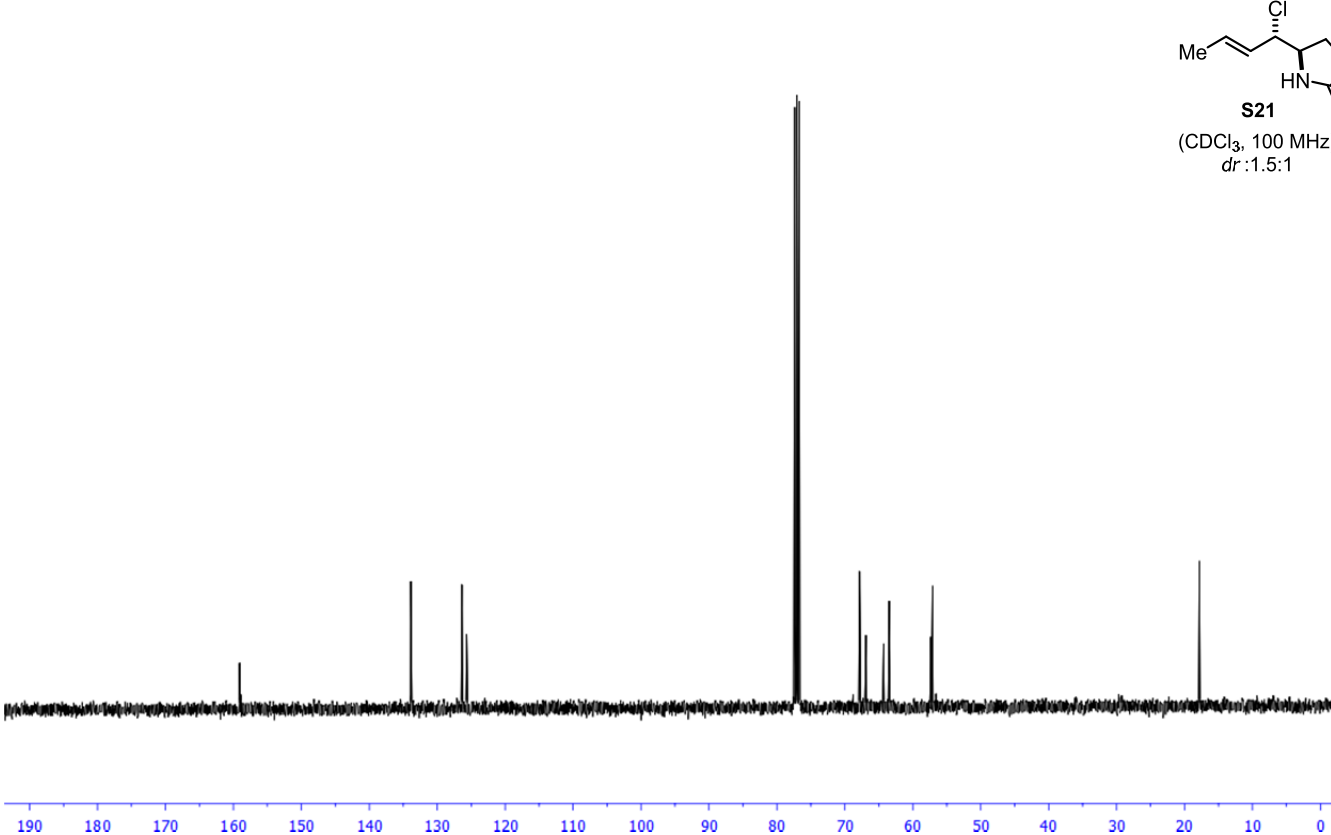



5.55  
4.73  
4.72  
4.71  
4.70  
3.82  
3.81  
3.80  
3.79  
3.77  
3.76  
3.64  
3.62  
3.60  
2.26  
2.25  
2.22  
2.18  
2.17  
2.16  
2.16  
2.15  
1.81  
1.80  
1.78  
1.77  
1.76  
1.76  
1.75  
1.74  
1.72  
1.72  
1.71  
1.70  
1.69  
1.68  
1.67  
1.66  
1.66  
1.65  
1.63  
1.63  
1.62  
1.61  
1.60  
1.60  
1.58  
1.58  
1.55  
1.55

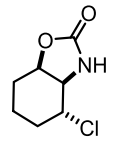

**S22**

(CDCl<sub>3</sub>, 400 MHz)  
dr >20:1

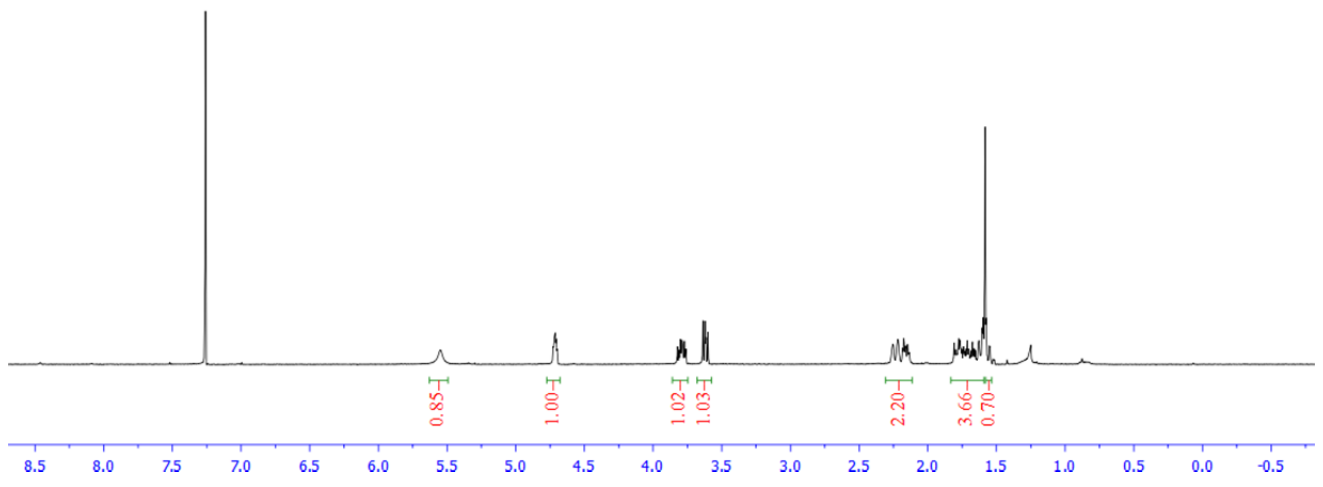

— 159.07

— 76.96

— 62.19  
— 60.57

— 31.81

— 25.90

— 19.74

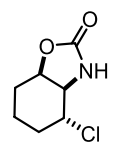

**S22**

(CDCl<sub>3</sub>, 100 MHz)  
dr >20:1

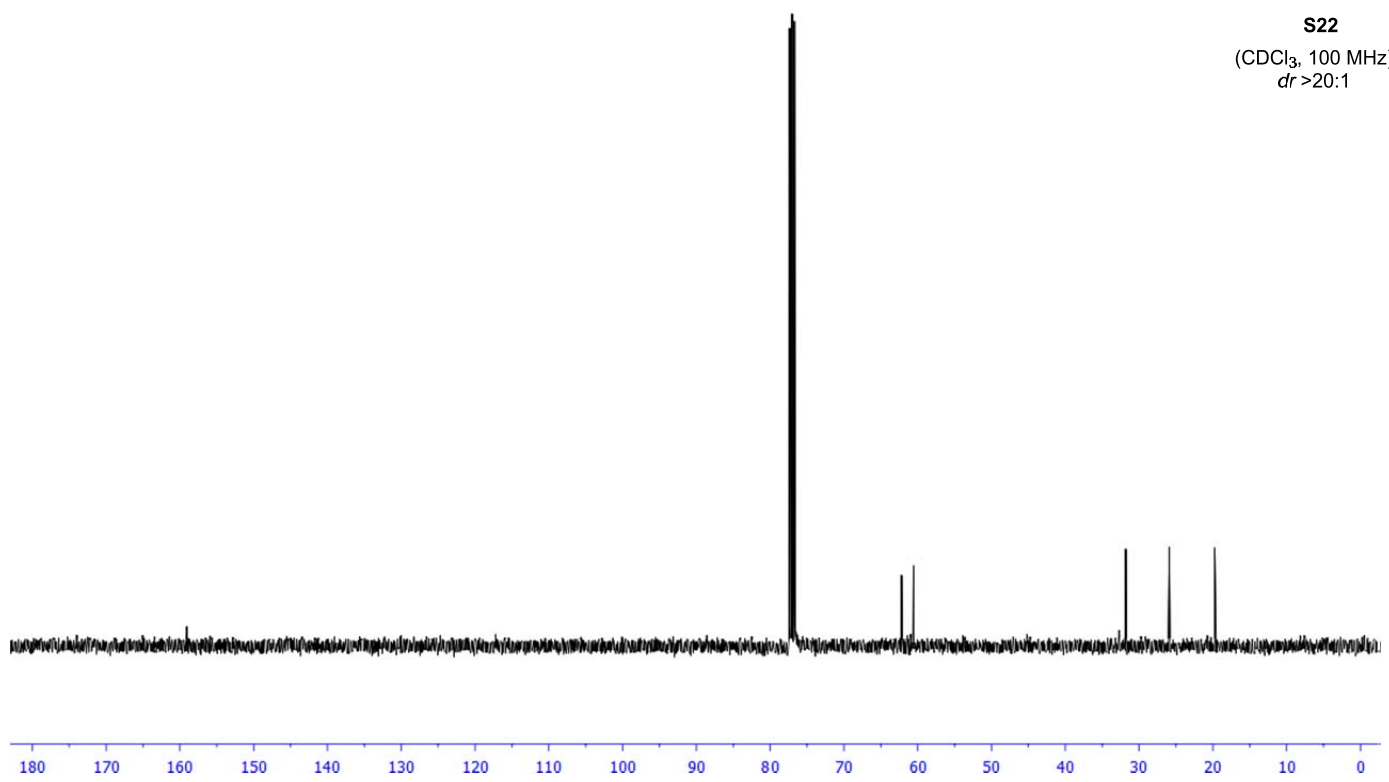

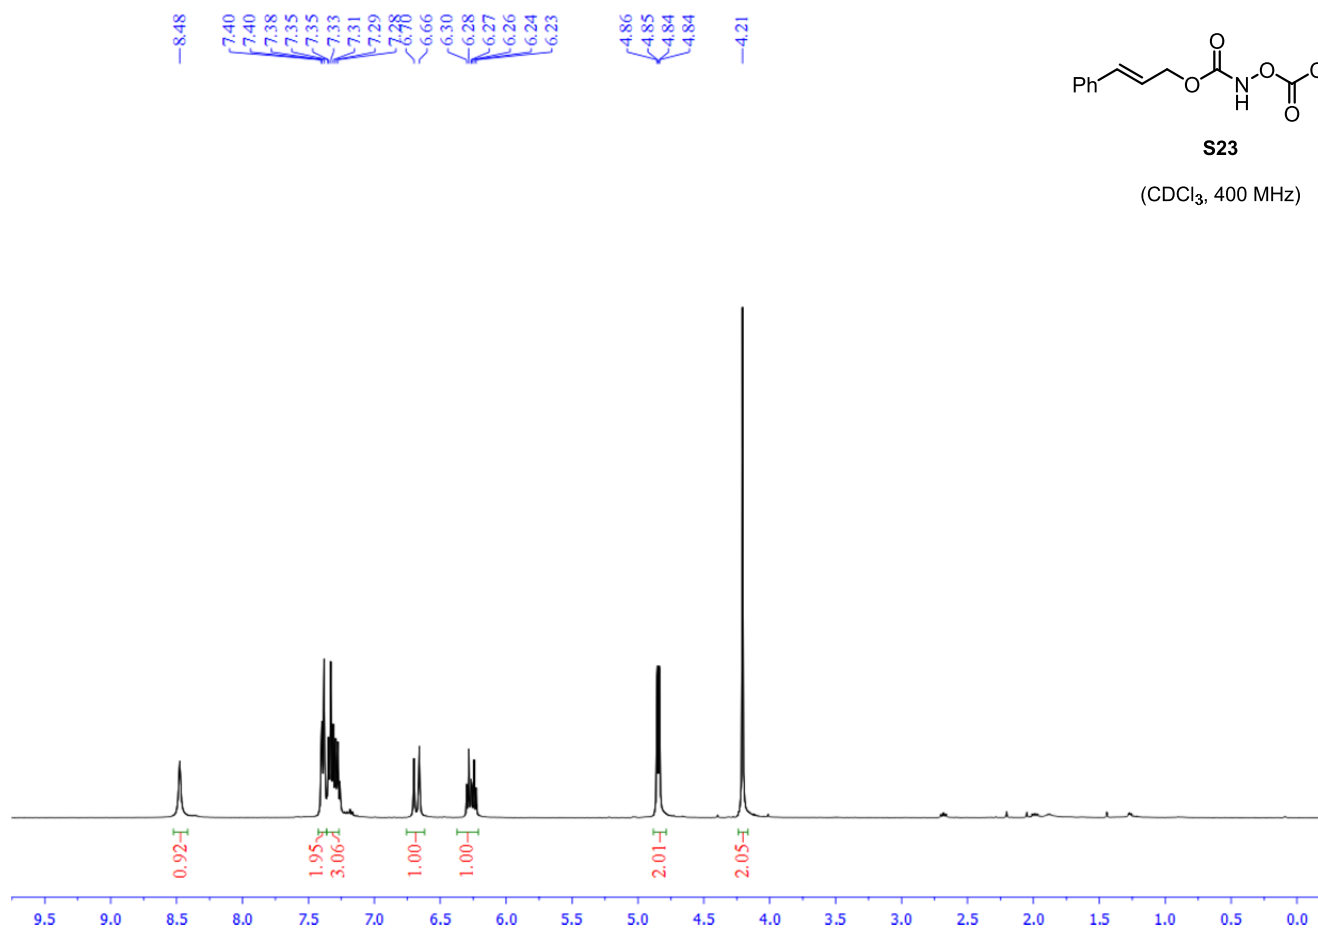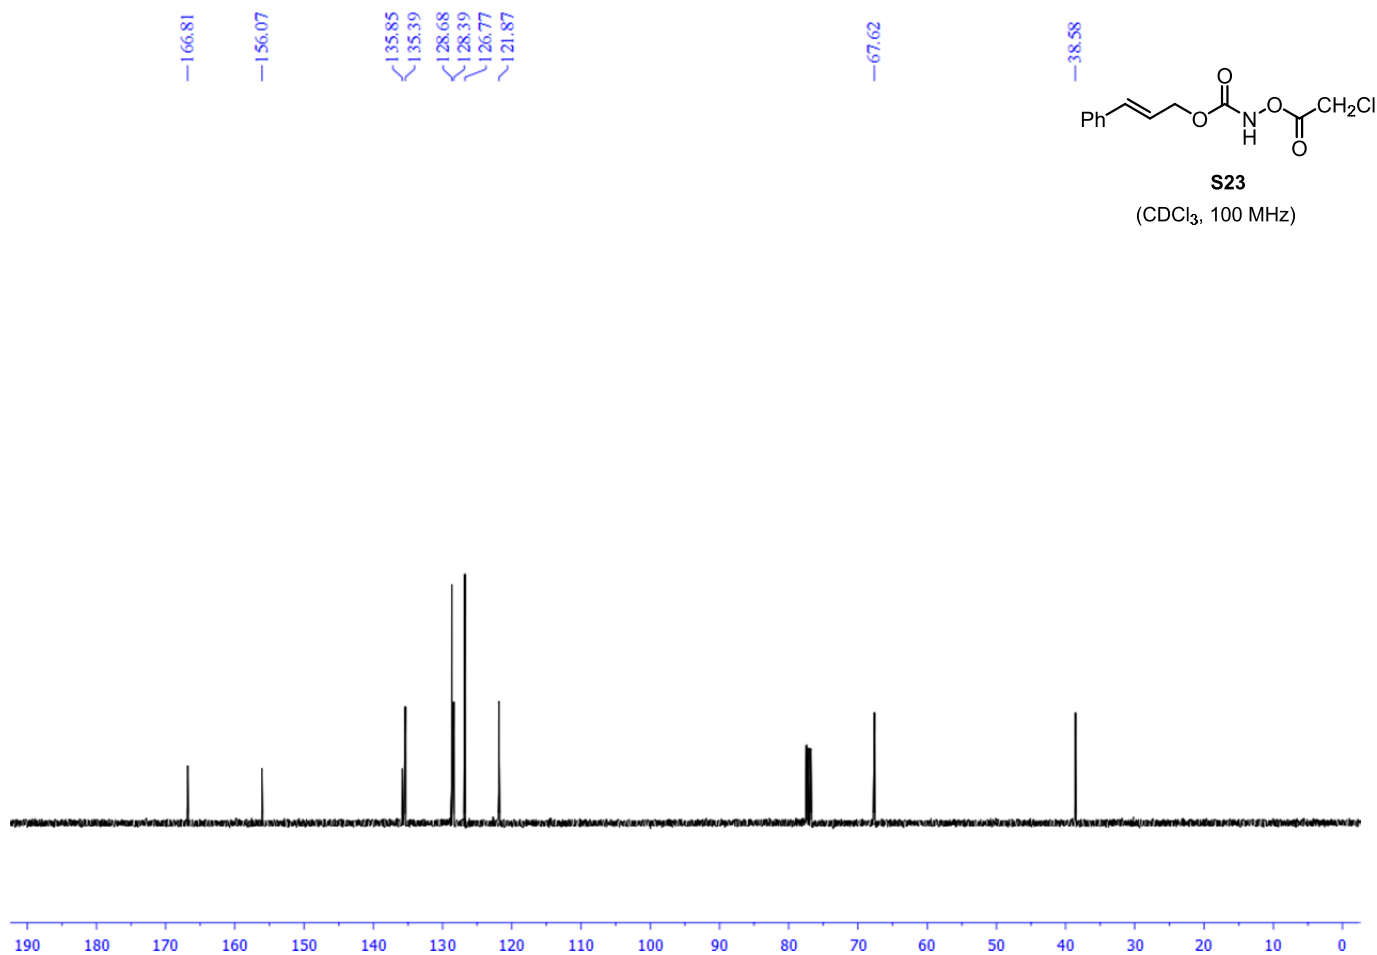

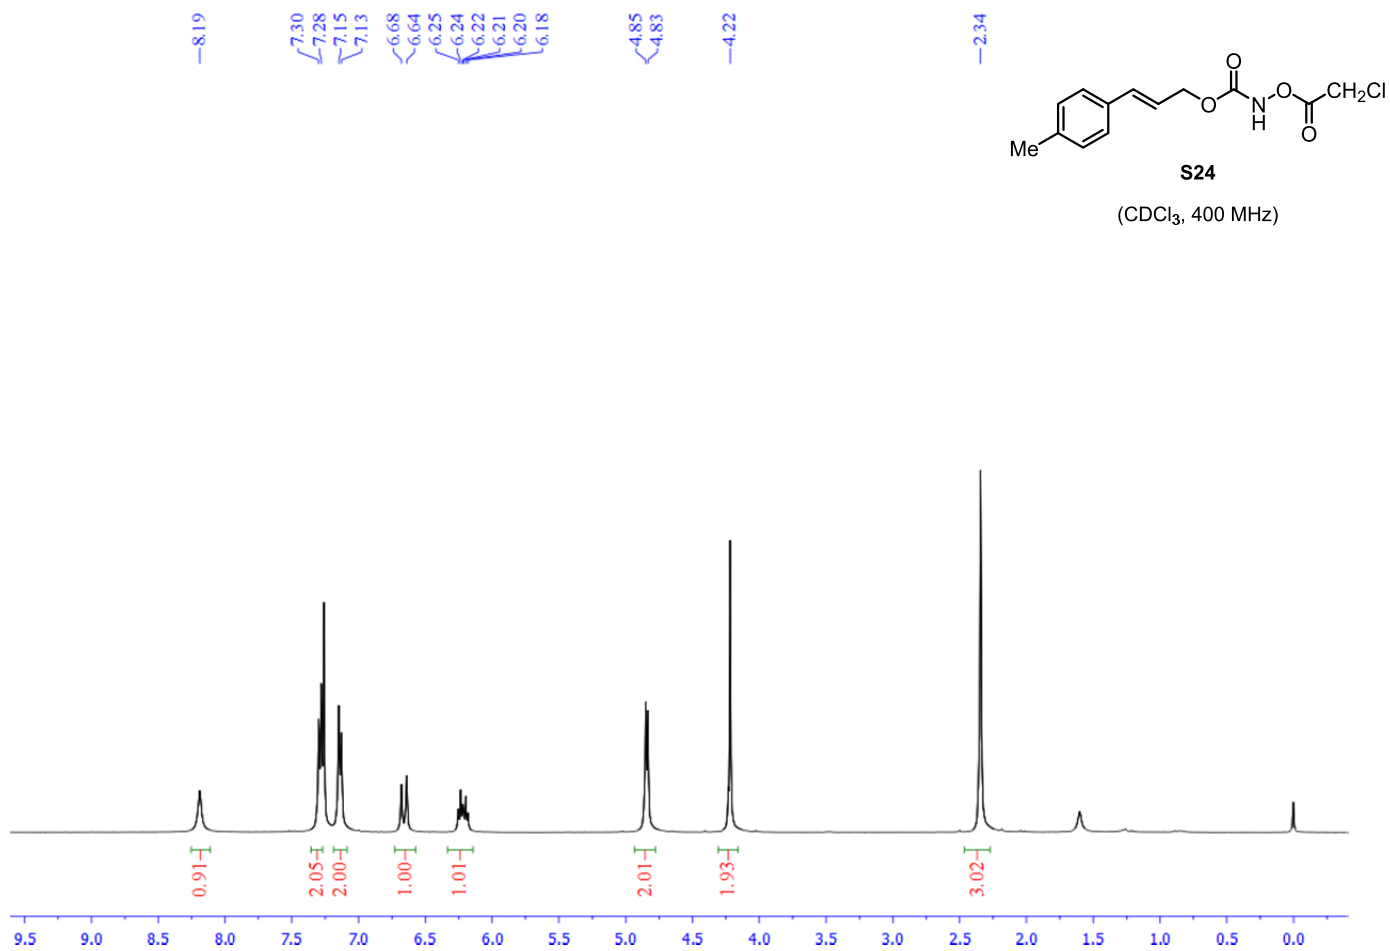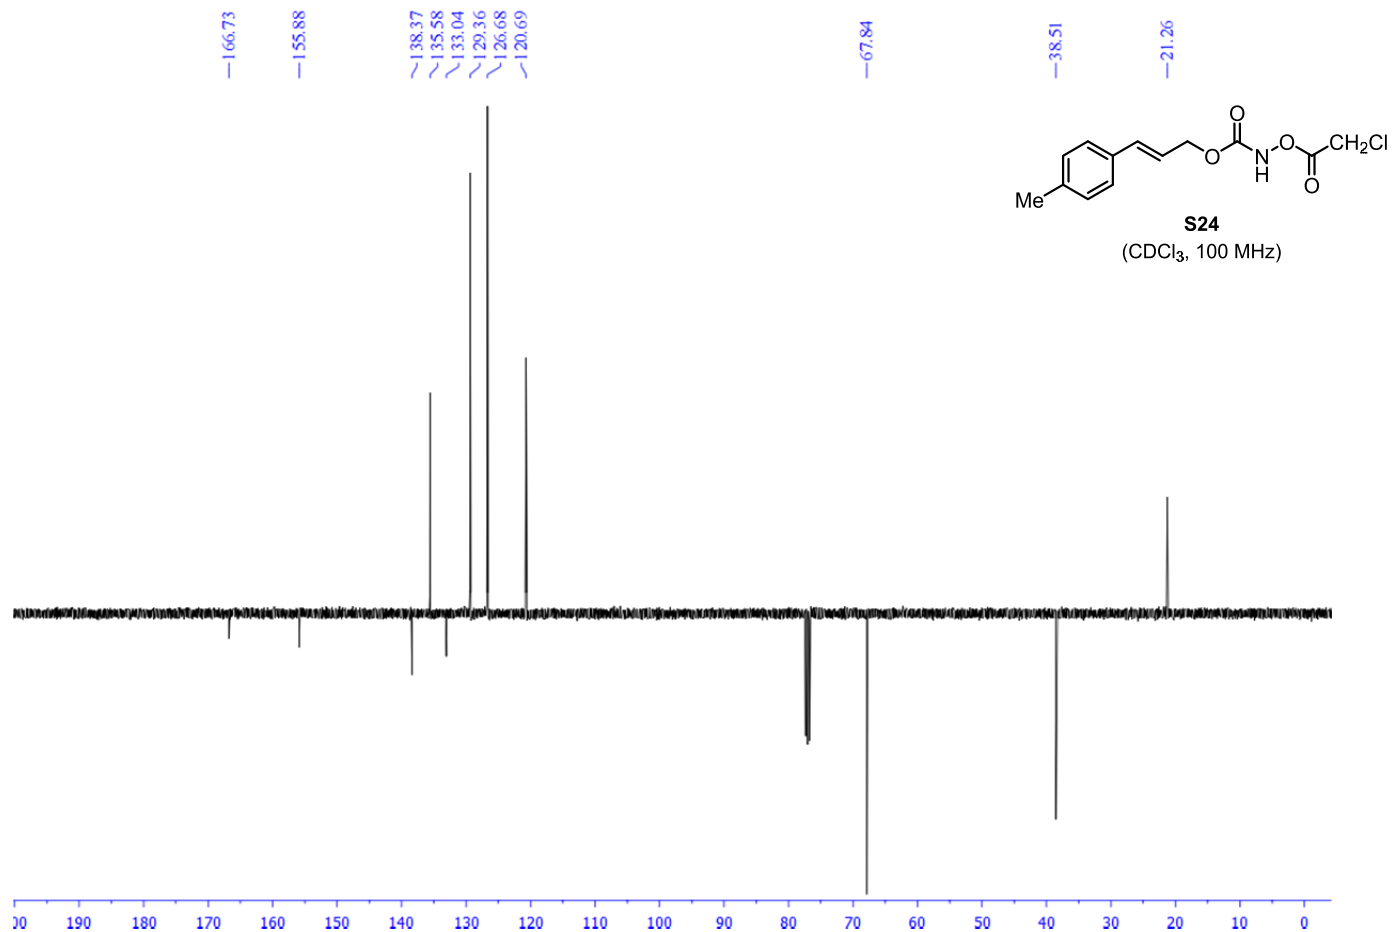

8.20  
8.03  
8.01  
7.48  
7.46  
7.46  
6.76  
6.72  
6.43  
6.41  
6.40  
6.39  
6.37  
6.36  
4.91  
4.91  
4.90  
4.89  
—4.25  
—3.94

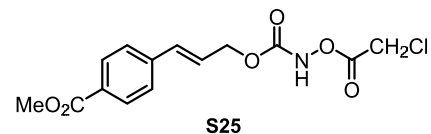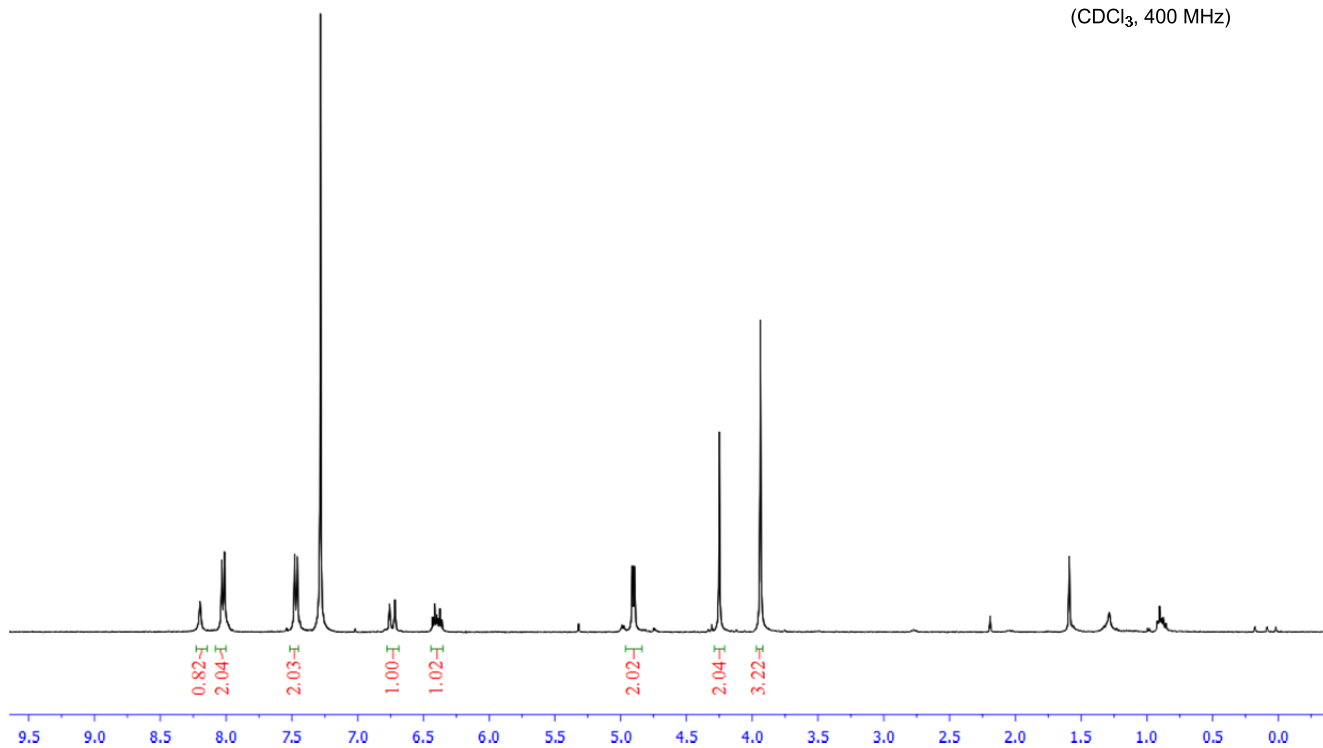

166.77  
155.95  
136.73  
135.78  
134.61  
128.68  
128.02  
127.34  
126.59  
125.38  
67.37  
38.55

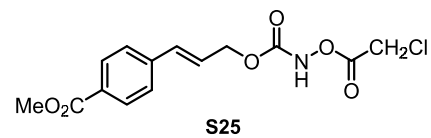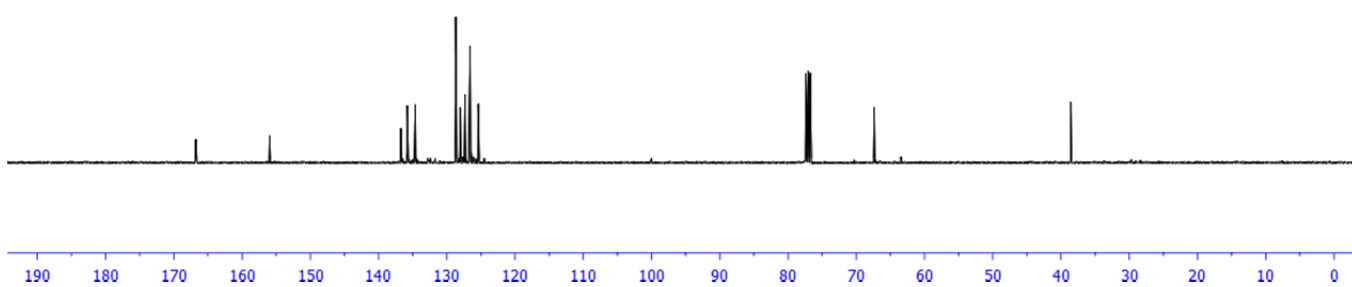

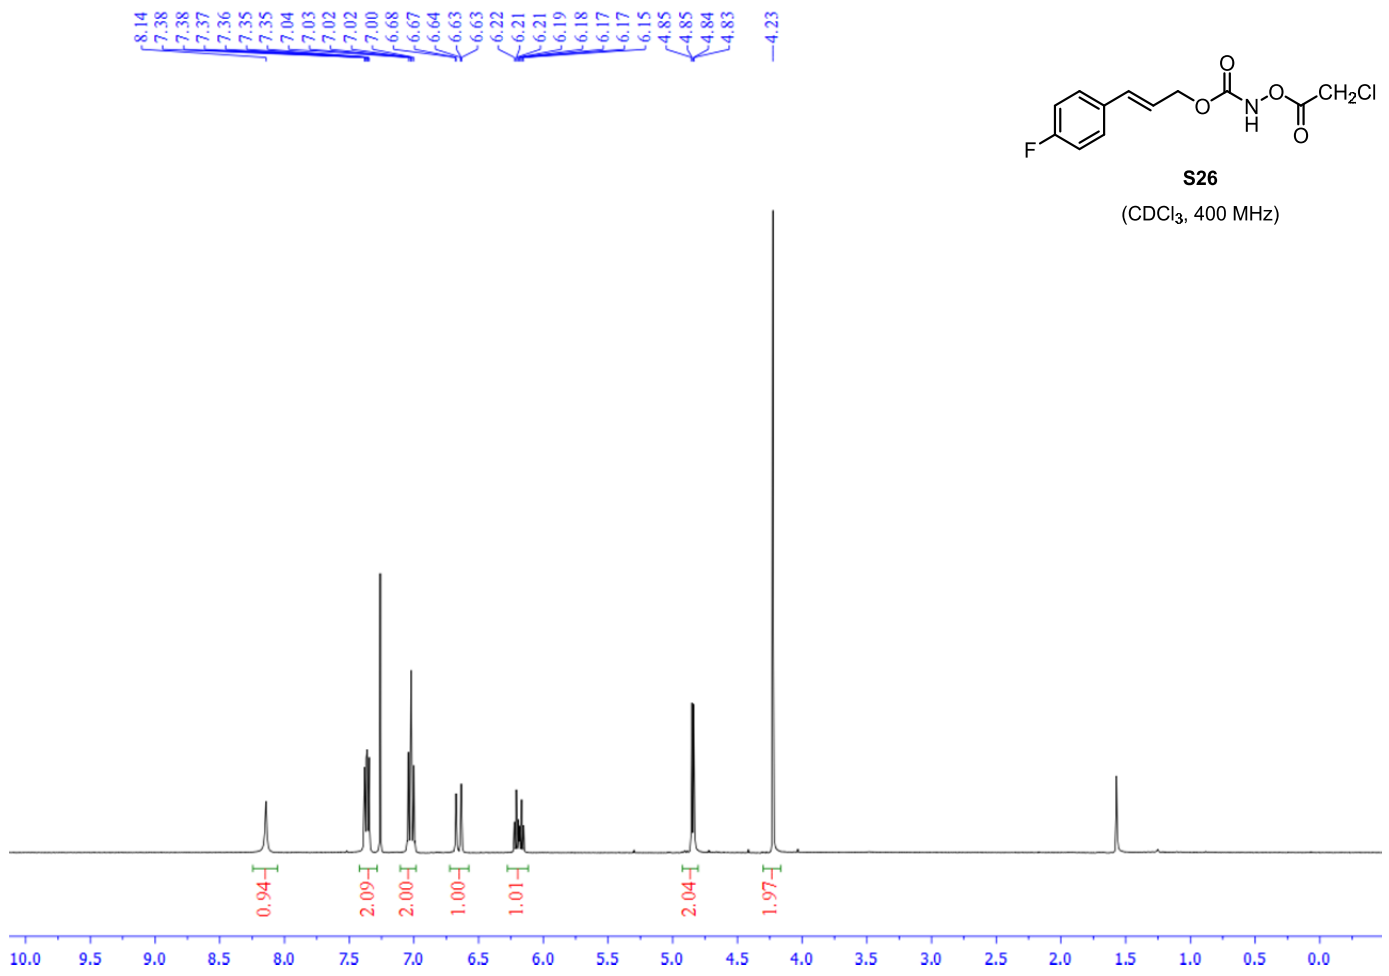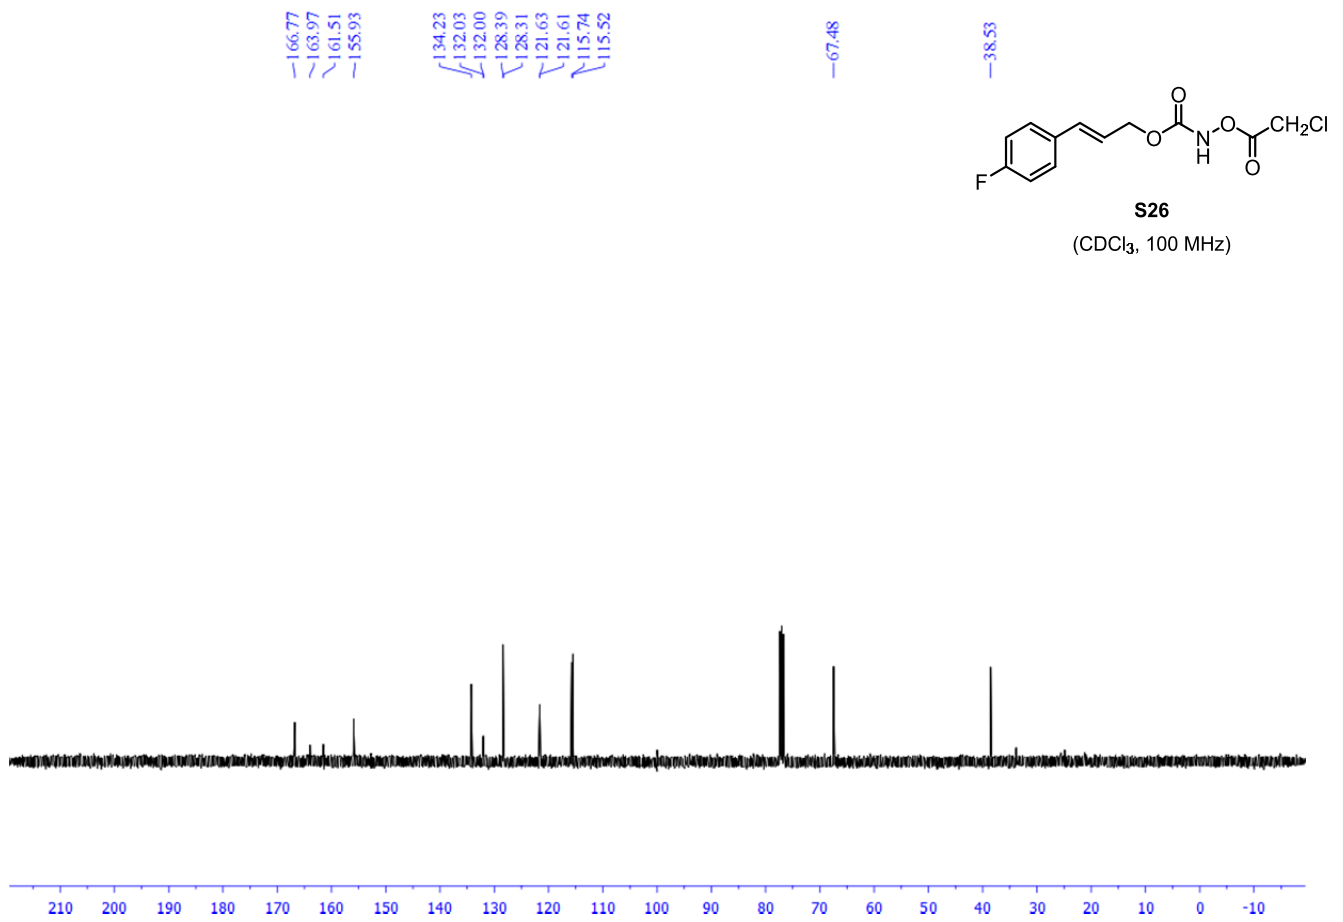

-113.12  
-113.14  
-113.15  
-113.16  
-113.17  
-113.18  
-113.20

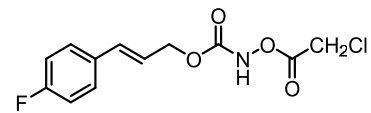

**S26**  
(CDCl<sub>3</sub>, 376MHz)

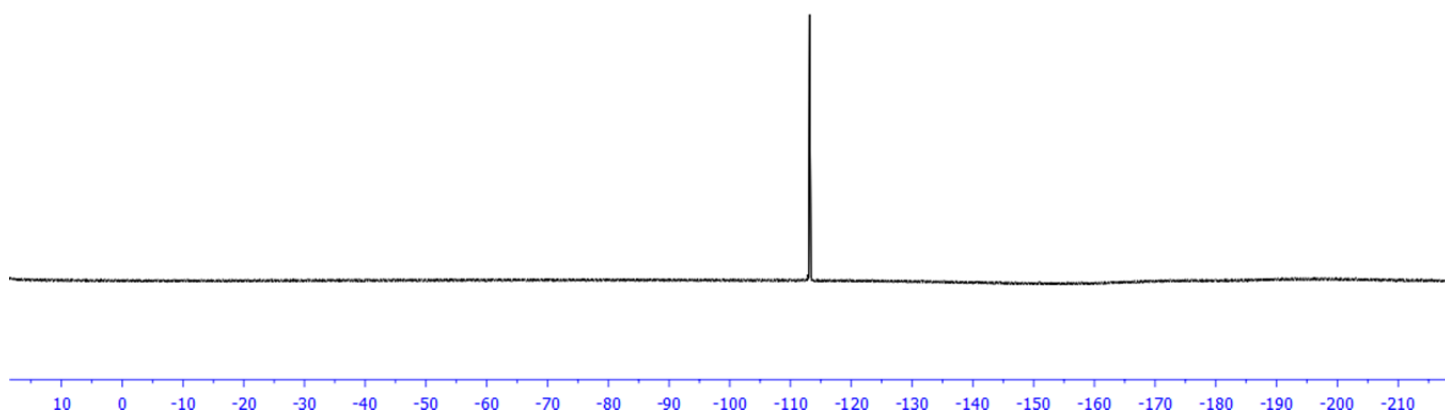

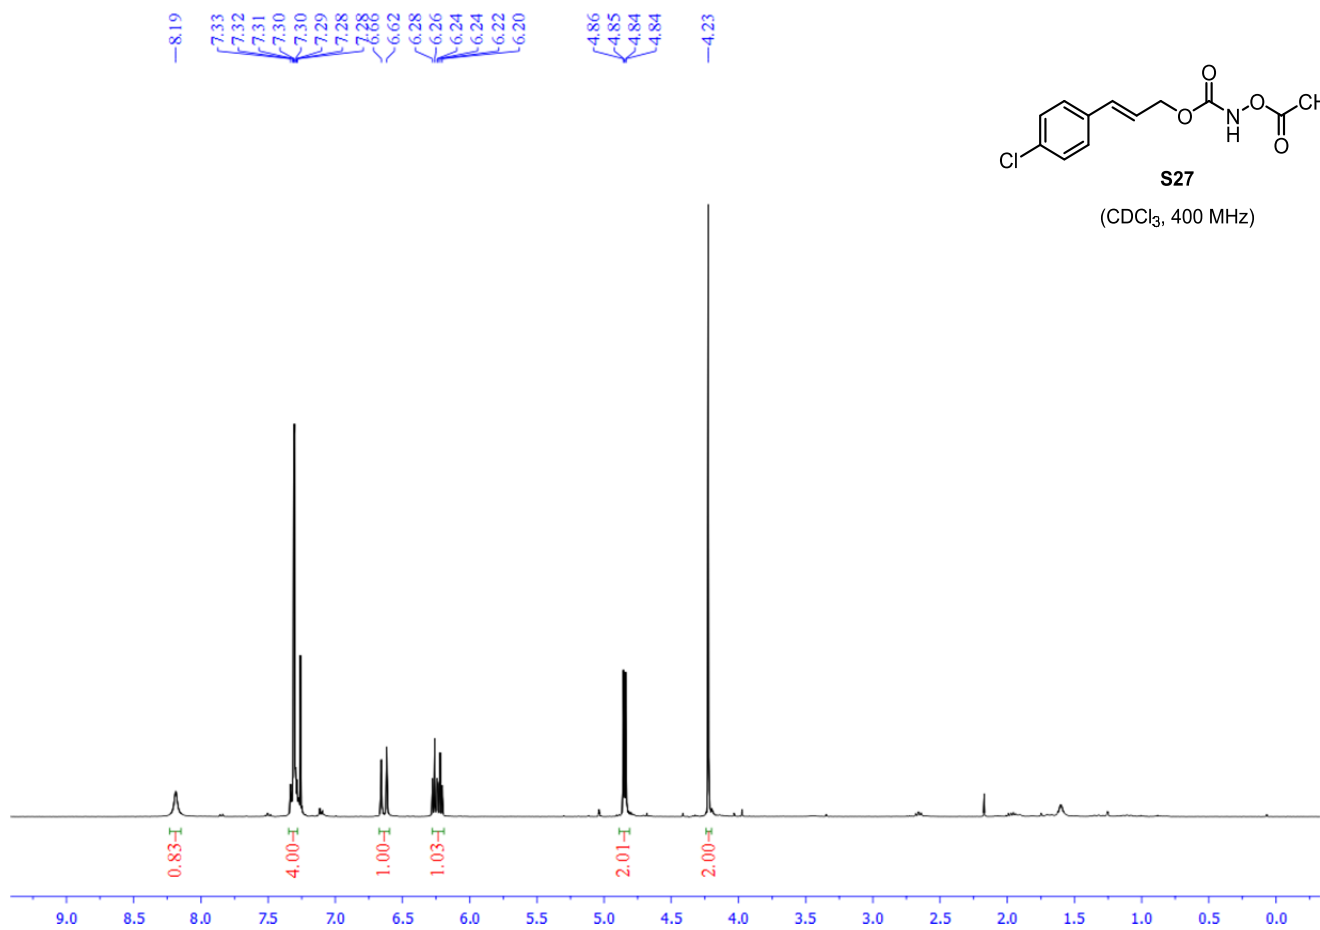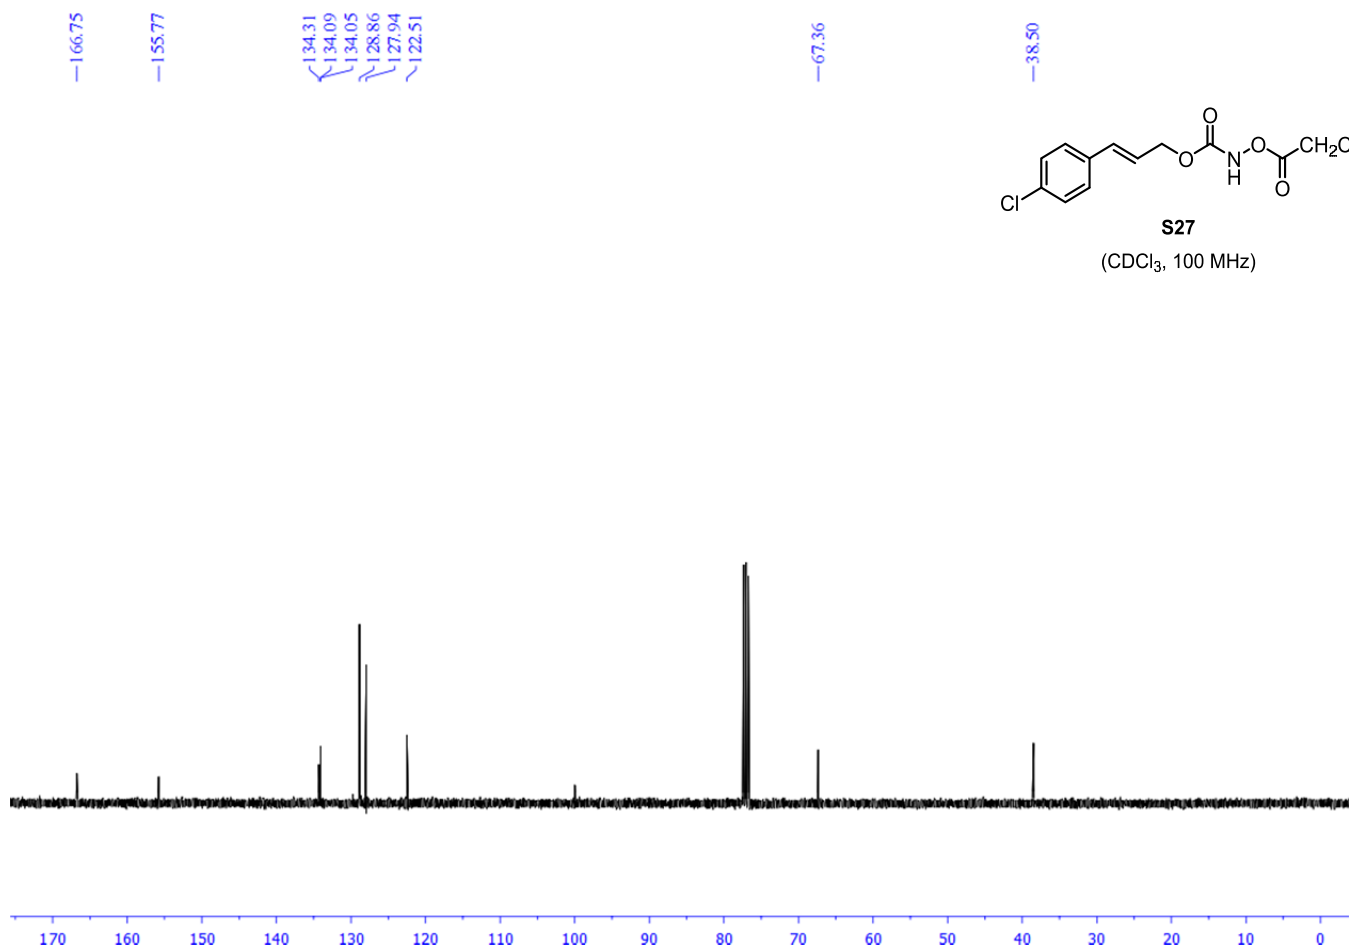

—8.18  
7.47  
7.46  
7.46  
7.45  
7.28  
7.27  
6.64  
6.60  
6.29  
6.27  
6.26  
6.25  
6.23  
6.22  
4.85  
4.85  
4.83  
4.83  
—4.22

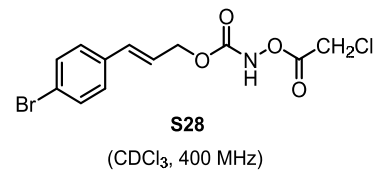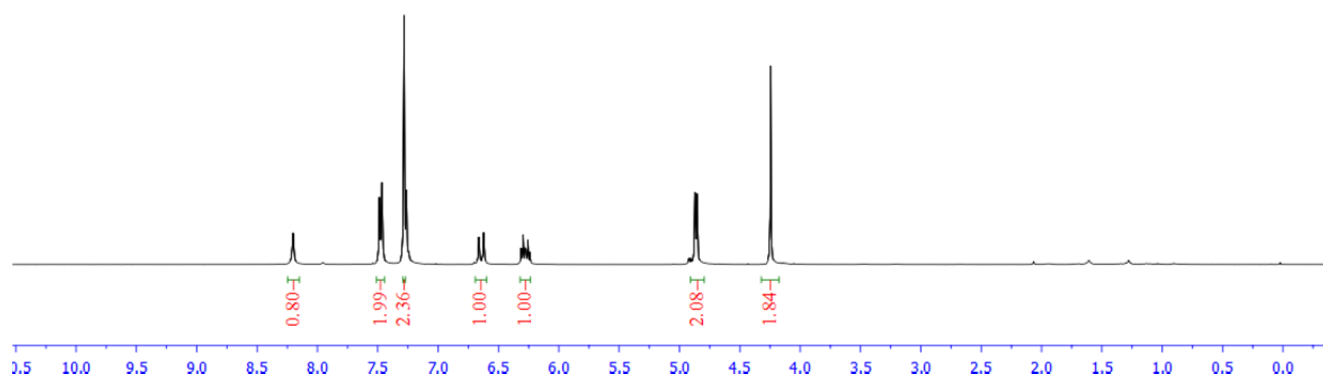

—166.74  
—155.76  
134.76  
134.06  
131.81  
128.24  
122.65  
122.28

—67.33

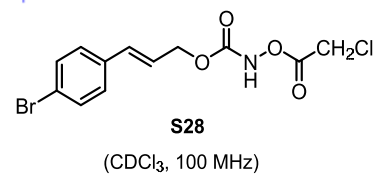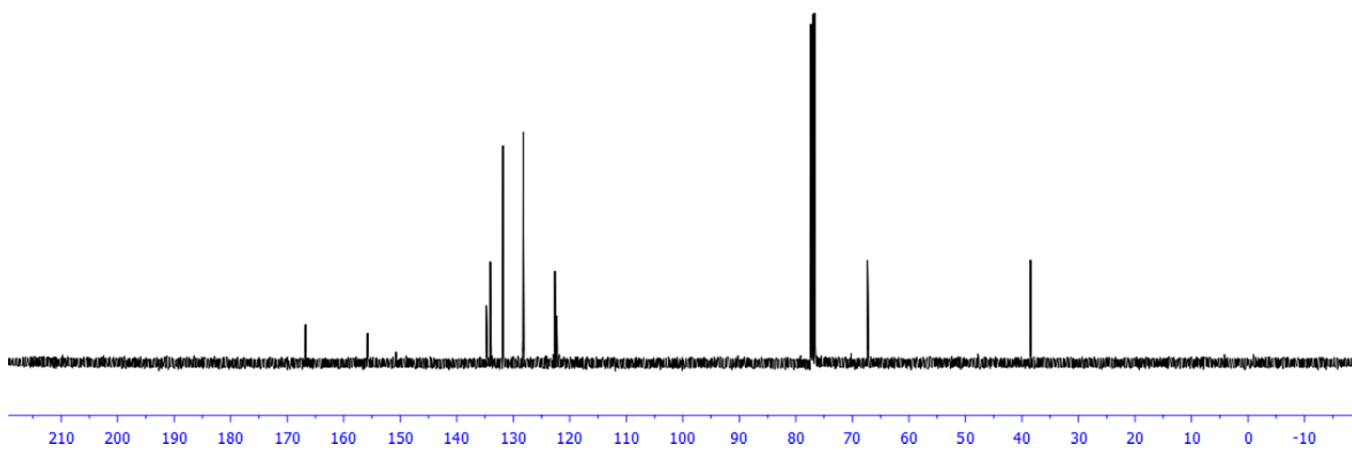



8.27  
7.24  
7.23  
7.21  
7.20  
7.20  
7.19  
7.19  
7.18  
7.18  
7.11  
7.11  
7.10  
7.10  
7.09  
7.09  
7.08  
6.68  
6.68  
6.67  
6.64  
6.64  
6.63  
6.63  
6.27  
6.26  
6.25  
6.23  
6.22  
4.86  
4.85  
4.84  
4.84  
4.22  
4.22

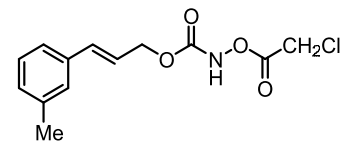

**S29**

(CDCl<sub>3</sub>, 400 MHz)

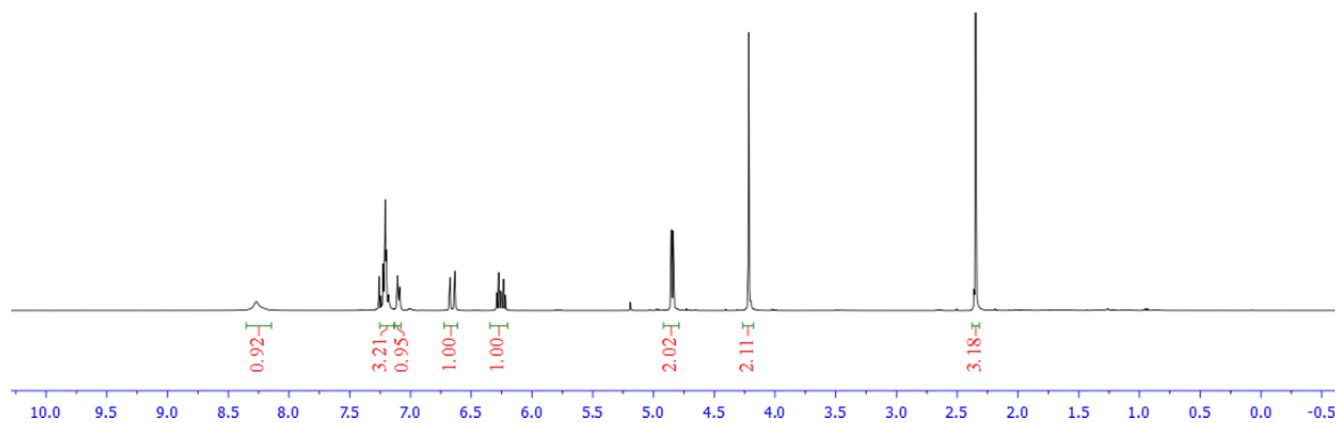

166.78  
156.05  
138.26  
135.78  
135.57  
129.18  
128.56  
127.46  
123.93  
121.63

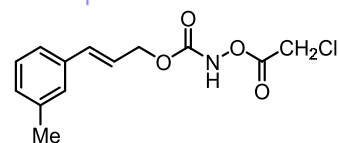

**S29**

(CDCl<sub>3</sub>, 100 MHz)

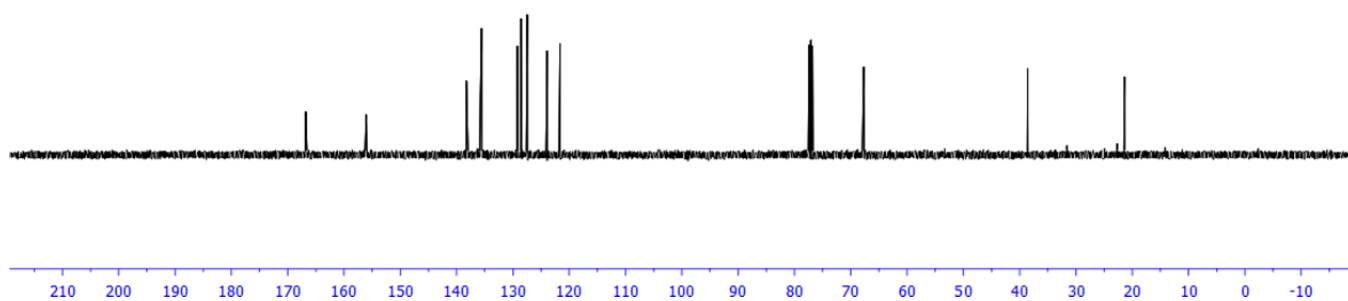

8.22  
7.38  
7.37  
7.26  
7.25  
7.25  
7.24  
6.64  
6.64  
6.64  
6.60  
6.60  
6.60  
6.31  
6.29  
6.27  
6.27  
6.25  
6.23  
4.86  
4.86  
4.84  
4.84  
4.23

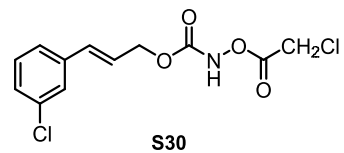

(CDCl<sub>3</sub>, 400 MHz)

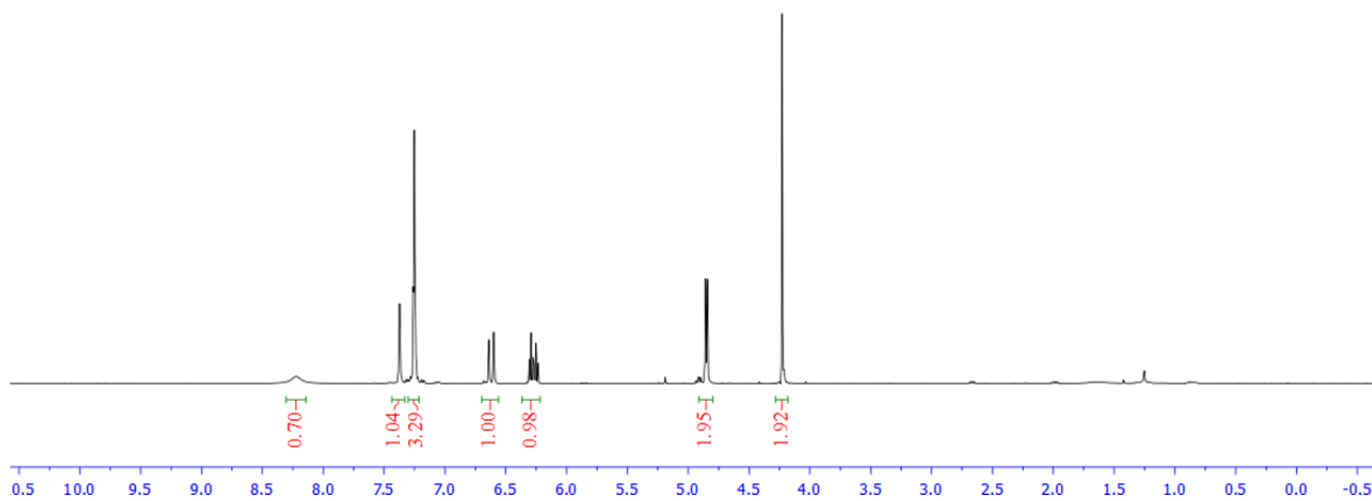

166.76  
155.81  
137.69  
134.63  
133.71  
129.90  
128.29  
126.64  
124.95  
123.45

67.17

38.51

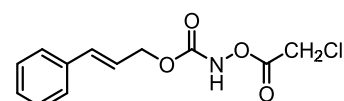

(CDCl<sub>3</sub>, 100 MHz)

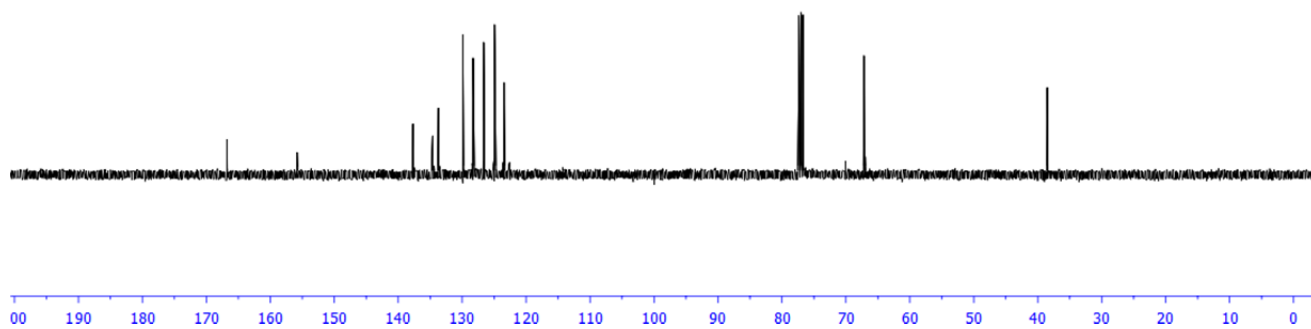

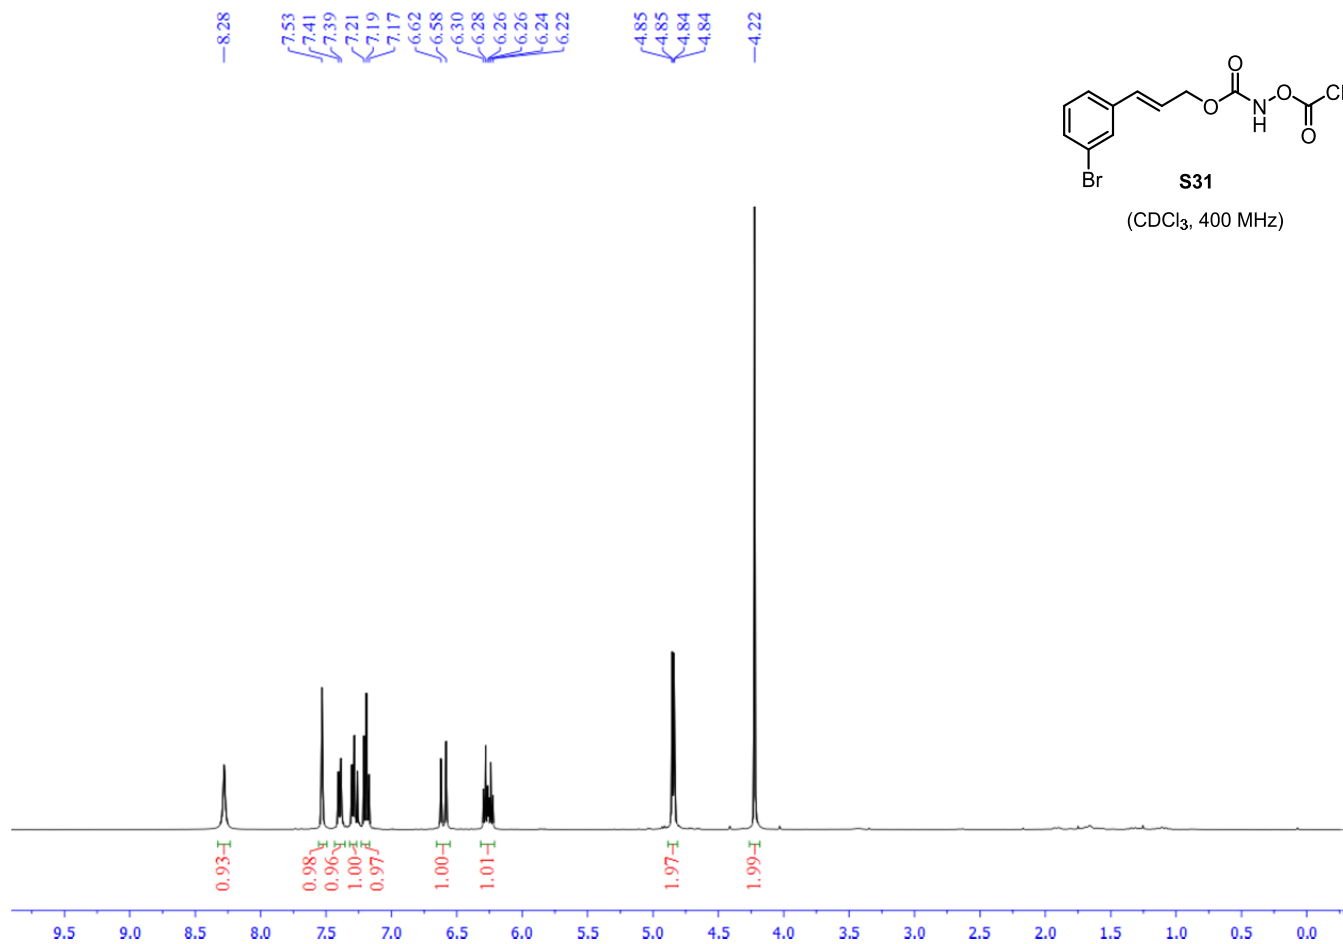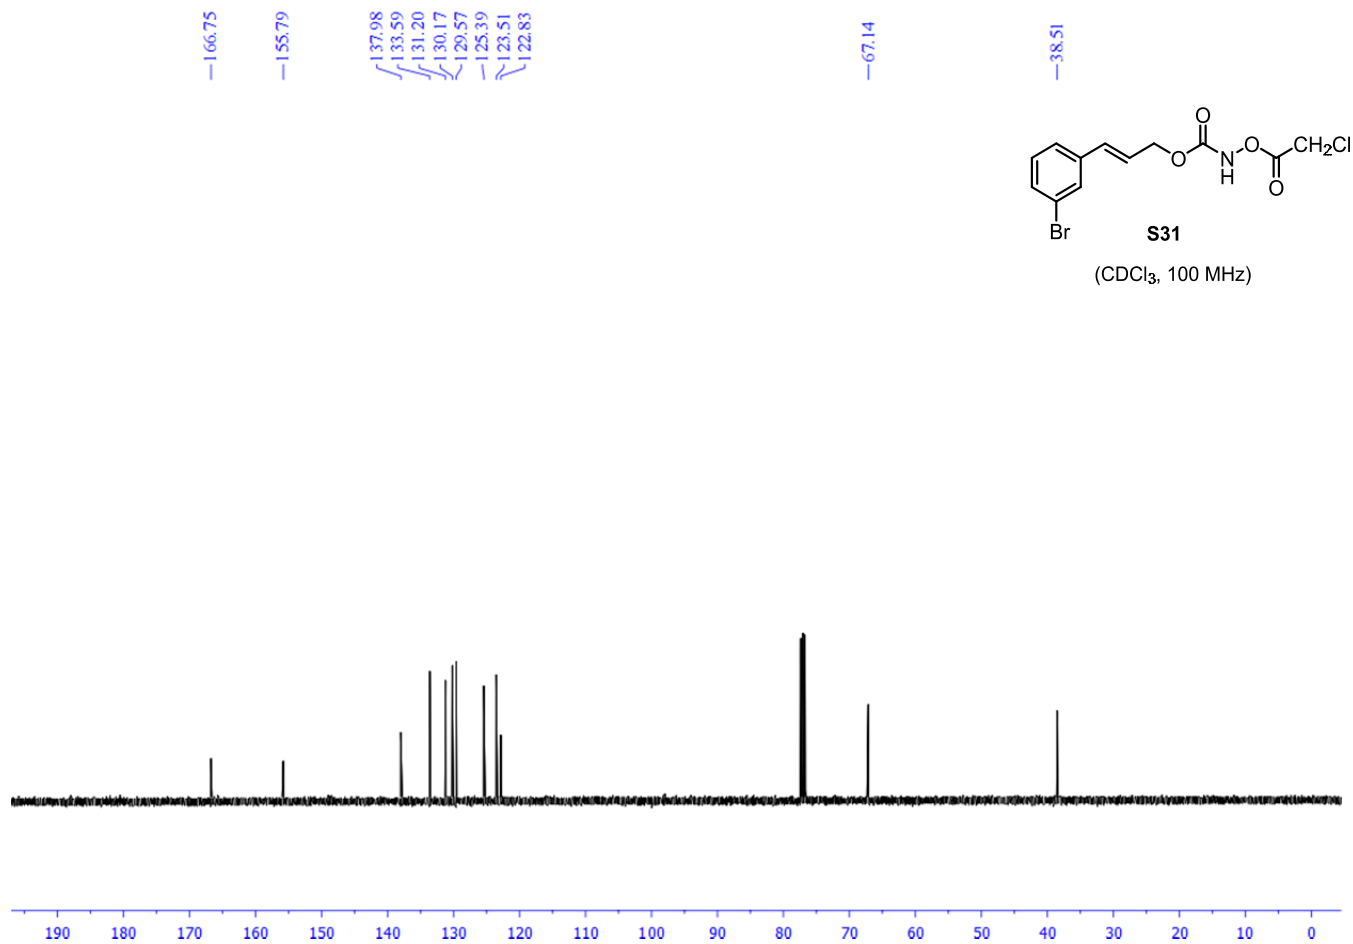

—8.13  
7.42  
7.19  
7.18  
7.17  
7.16  
7.16  
6.93  
6.89  
6.17  
6.15  
6.15  
6.13  
6.11  
4.88  
4.88  
4.86  
4.86  
—4.22  
—2.35

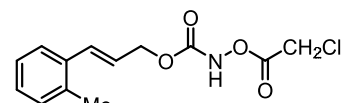

**S32**  
(CDCl<sub>3</sub>, 400 MHz)

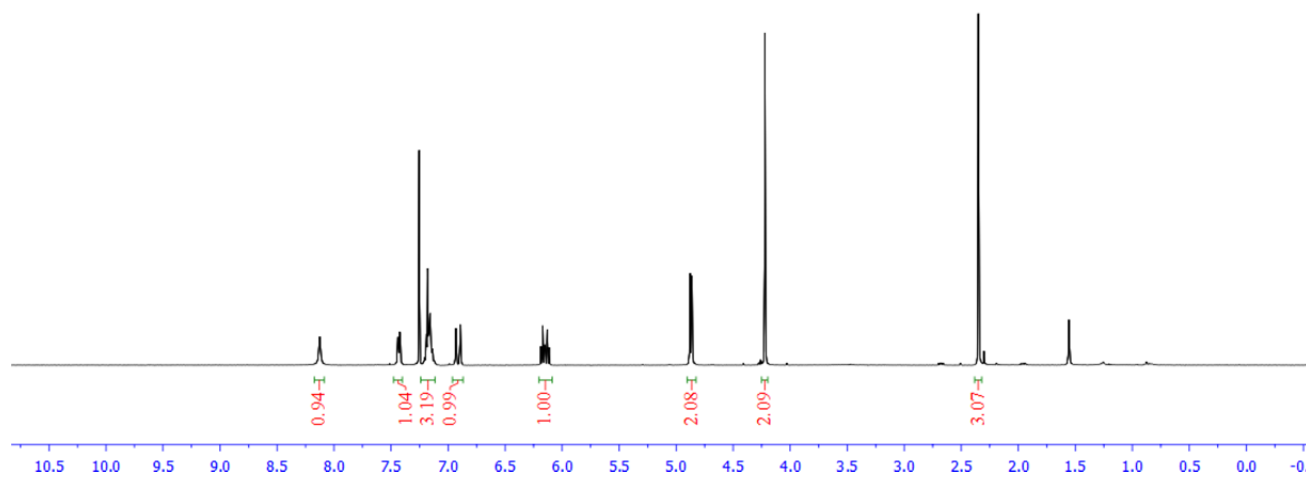

—166.74  
—155.86  
135.83  
134.96  
133.38  
130.38  
128.23  
126.18  
125.89  
123.12  
—67.84  
—38.51  
—19.74

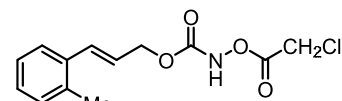

**S32**  
(CDCl<sub>3</sub>, 100 MHz)

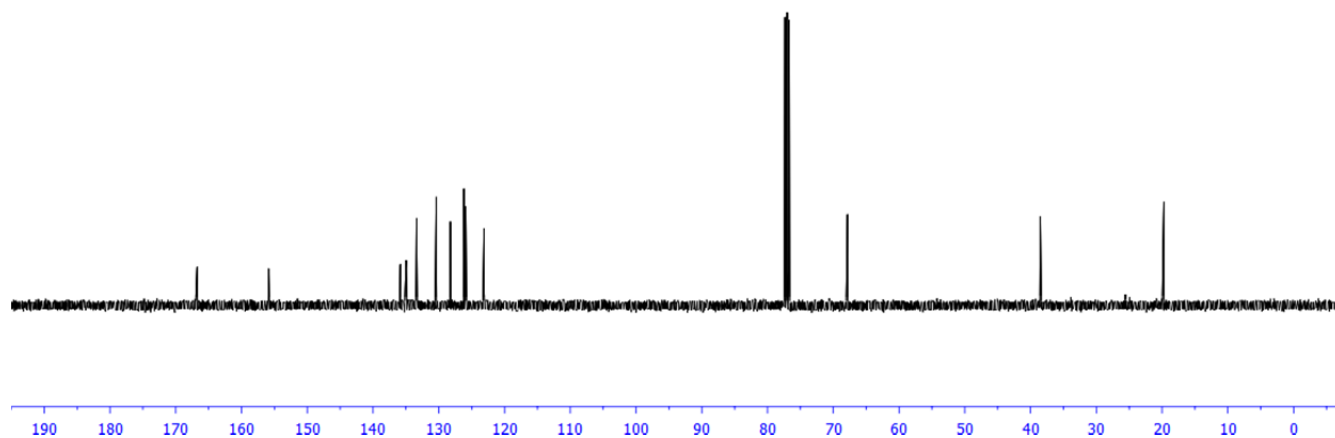

8.20  
7.54  
7.53  
7.52  
7.52  
7.37  
7.37  
7.36  
7.35  
7.24  
7.24  
7.23  
7.22  
7.22  
7.21  
7.10  
7.10  
7.10  
7.06  
7.06  
7.06  
6.30  
6.28  
6.26  
6.26  
6.24  
6.22  
4.90  
4.89  
4.88  
-4.23

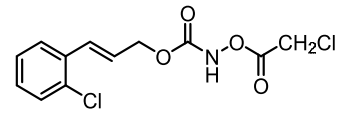

**S33**  
(CDCl<sub>3</sub>, 400 MHz)

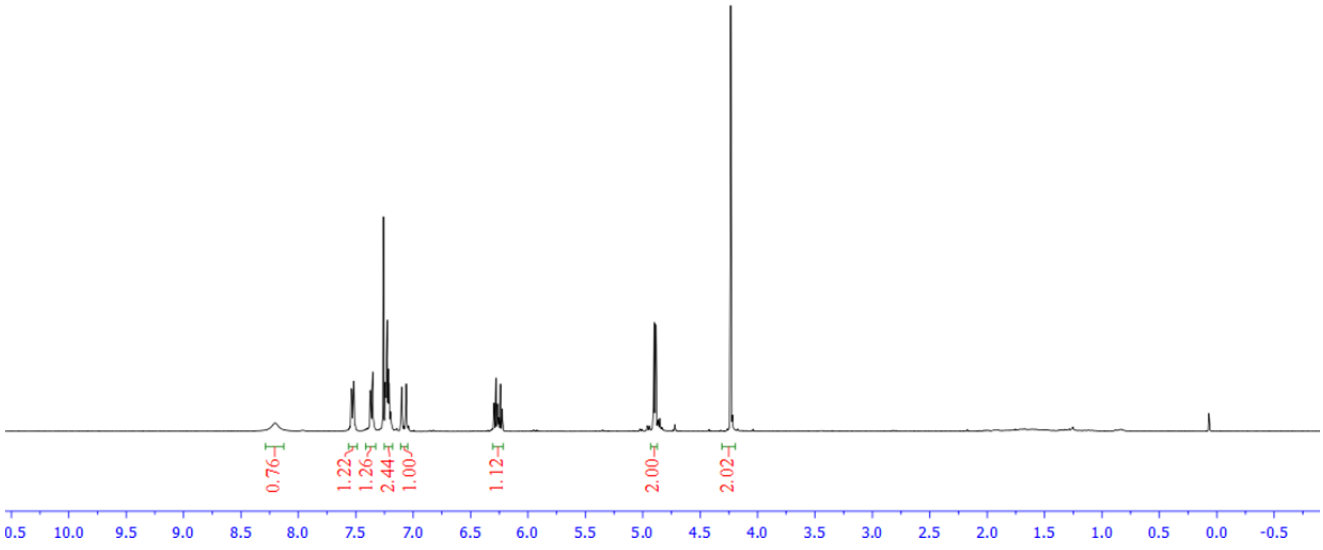

-166.71  
-155.71  
134.03  
133.39  
131.24  
129.79  
129.34  
127.08  
126.95  
124.69  
-67.36  
-38.49

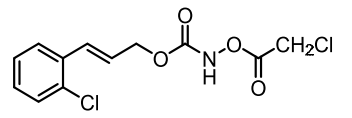

**S33**  
(CDCl<sub>3</sub>, 100 MHz)

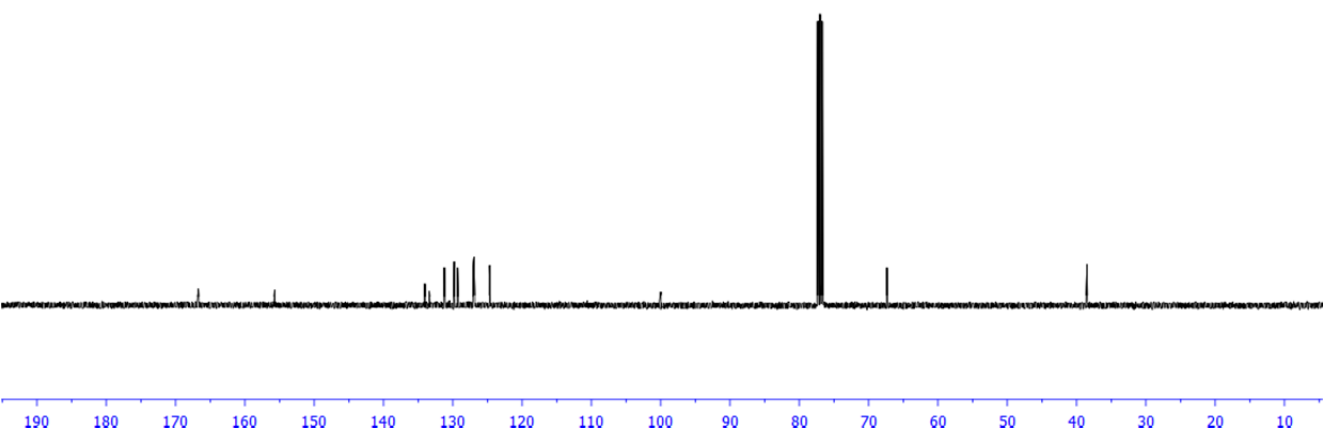

9.03  
8.61  
8.61  
8.50  
8.49  
7.73  
7.71  
7.28  
7.27  
7.26  
6.69  
6.65  
6.65  
6.64  
6.38  
6.36  
6.35  
6.34  
6.32  
5.31  
4.88  
4.87  
4.86  
4.23

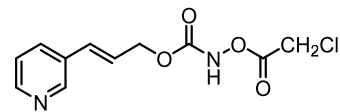

**S34**  
(CDCl<sub>3</sub>, 400 MHz)

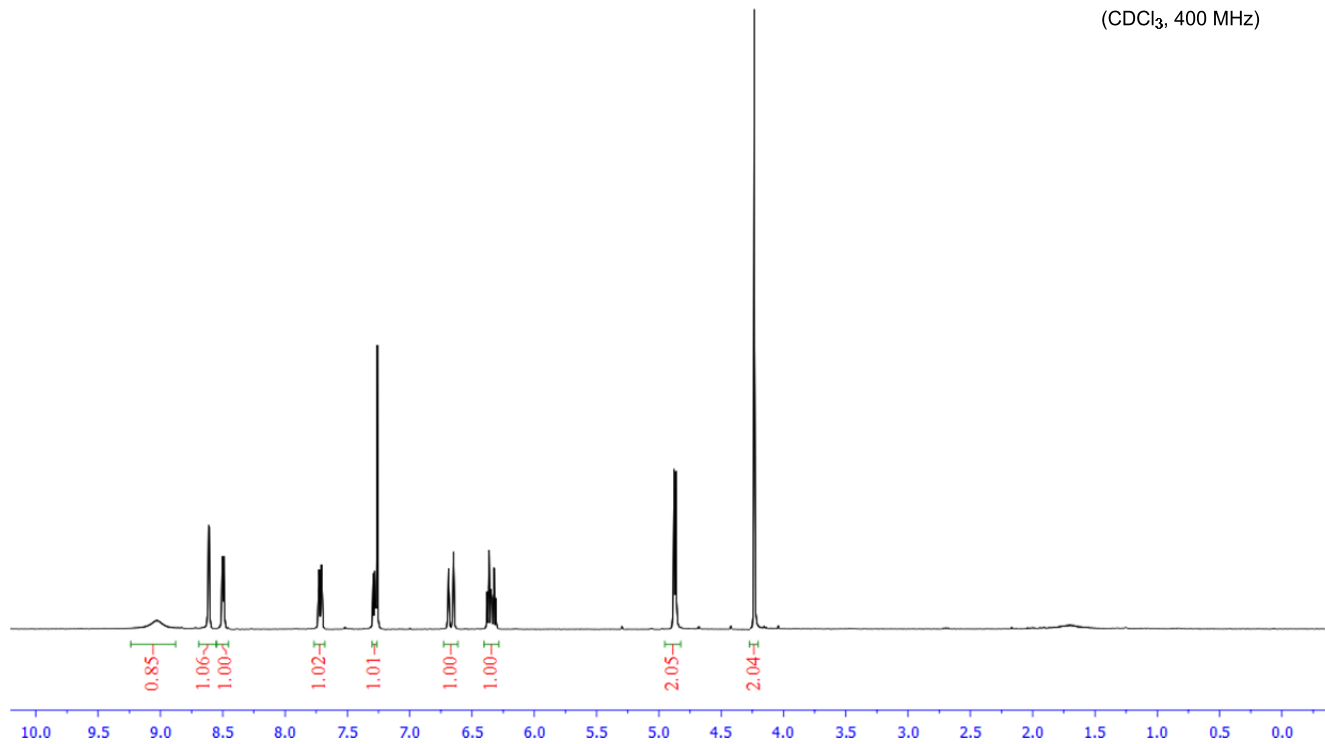

166.74  
155.85  
149.11  
148.30  
133.55  
131.67  
131.06  
124.60  
123.61  
66.80  
38.54

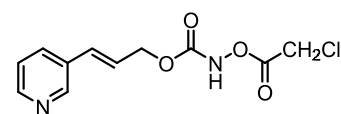

**S34**  
(CDCl<sub>3</sub>, 100 MHz)

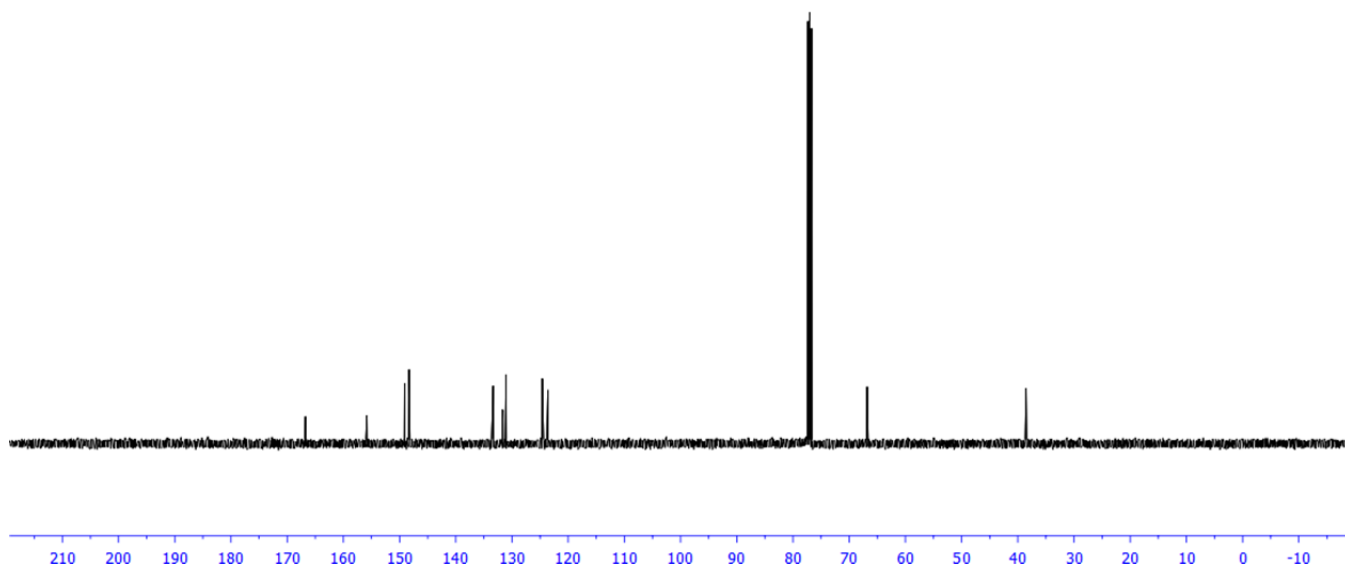

7.40  
7.39  
7.39  
7.38  
7.38  
7.37  
7.36  
7.14  
7.13  
7.12  
7.11  
7.10  
7.09

5.17  
4.73  
4.71  
4.63  
4.61  
4.60  
4.58  
4.47  
4.46  
4.45  
4.44  
4.27  
4.27  
4.26  
4.26  
4.25  
4.24  
4.23  
4.22  
4.22  
4.21

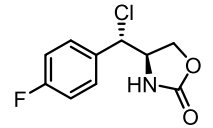

**S35**  
(CDCl<sub>3</sub>, 400 MHz)  
dr:17:1

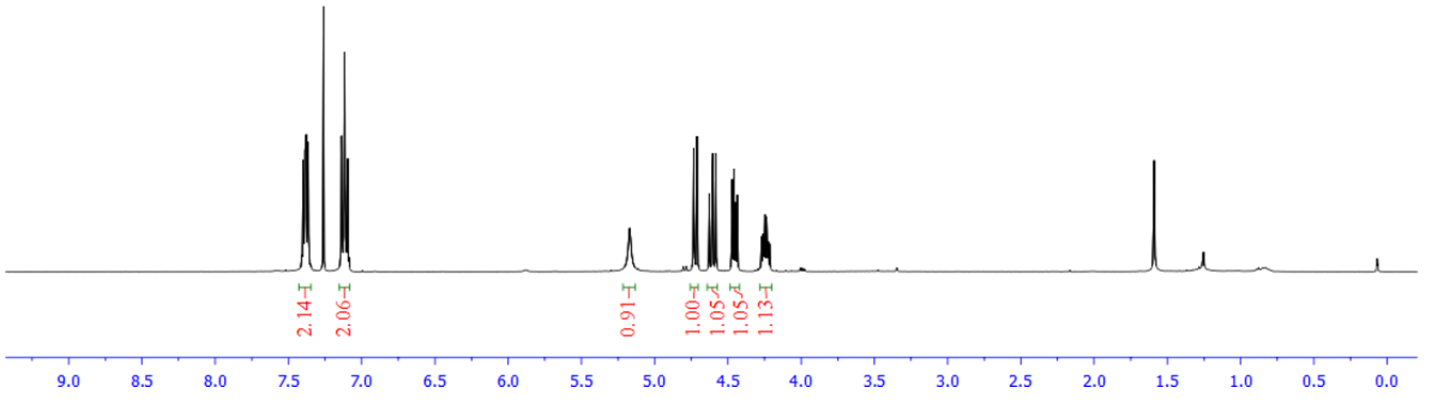

164.41  
161.93  
158.24

132.48  
132.45  
129.63  
129.54

116.48  
116.26

68.42  
62.72  
58.32

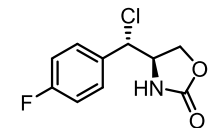

**S35**  
(CDCl<sub>3</sub>, 100 MHz)  
dr:17:1

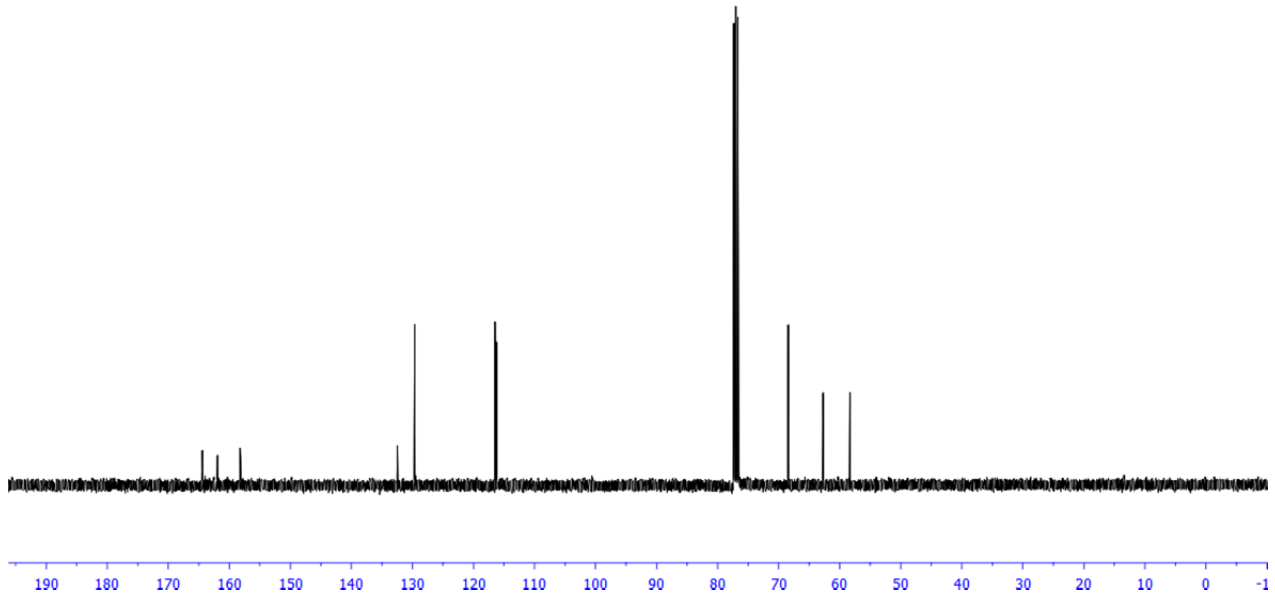

-110.84  
-110.86  
-110.87  
-110.88  
-110.89  
-110.90  
-110.92

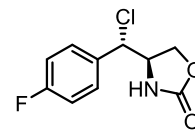

**S35**

(CDCl<sub>3</sub>, 376MHz)  
dr:17:1

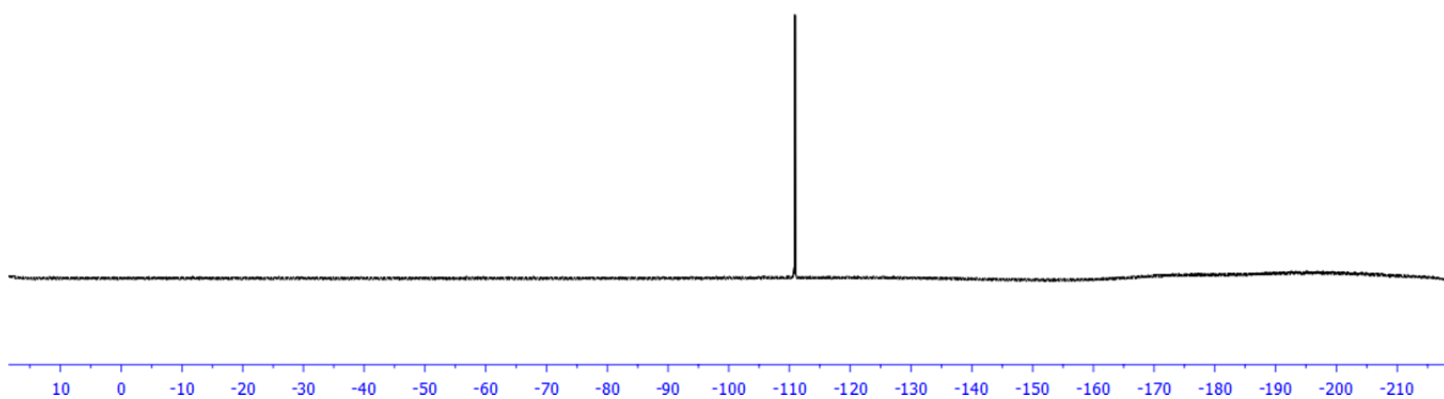



7.42  
7.41  
7.40  
7.39  
7.35  
7.35  
7.34  
7.33  
7.33

5.07  
5.07  
4.72  
4.69  
4.63  
4.61  
4.59  
4.47  
4.46  
4.45  
4.44  
4.26  
4.26  
4.25  
4.25  
4.24  
4.24  
4.23  
4.22  
4.22  
4.21  
4.20

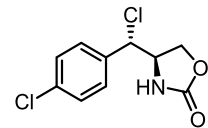

**S36**

(CDCl<sub>3</sub>, 400 MHz)  
*dr* >20:1

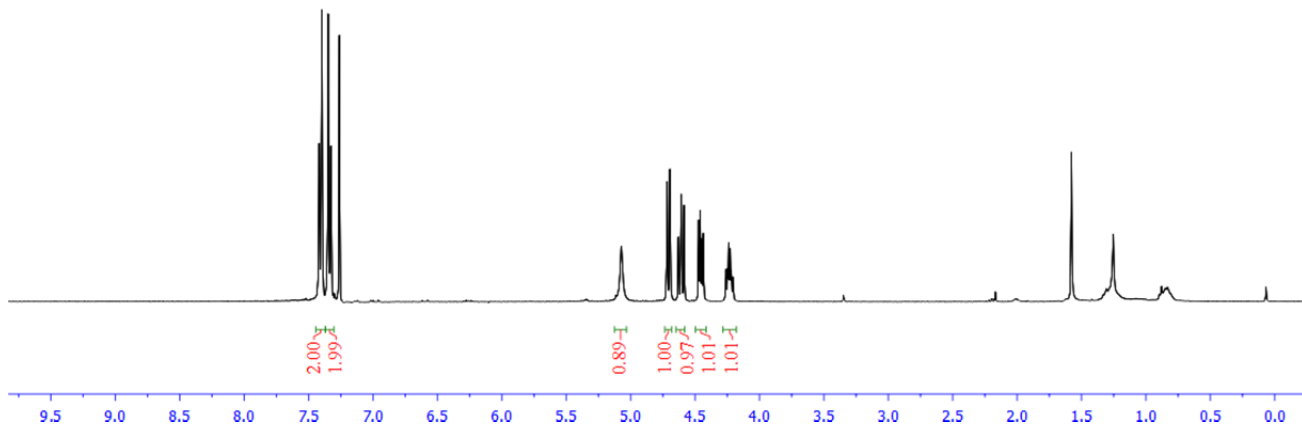

158.02

135.74  
135.03  
129.54  
129.05

68.41  
62.62  
58.20

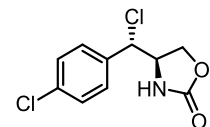

**S36**

(CDCl<sub>3</sub>, 100 MHz)  
*dr* >20:1

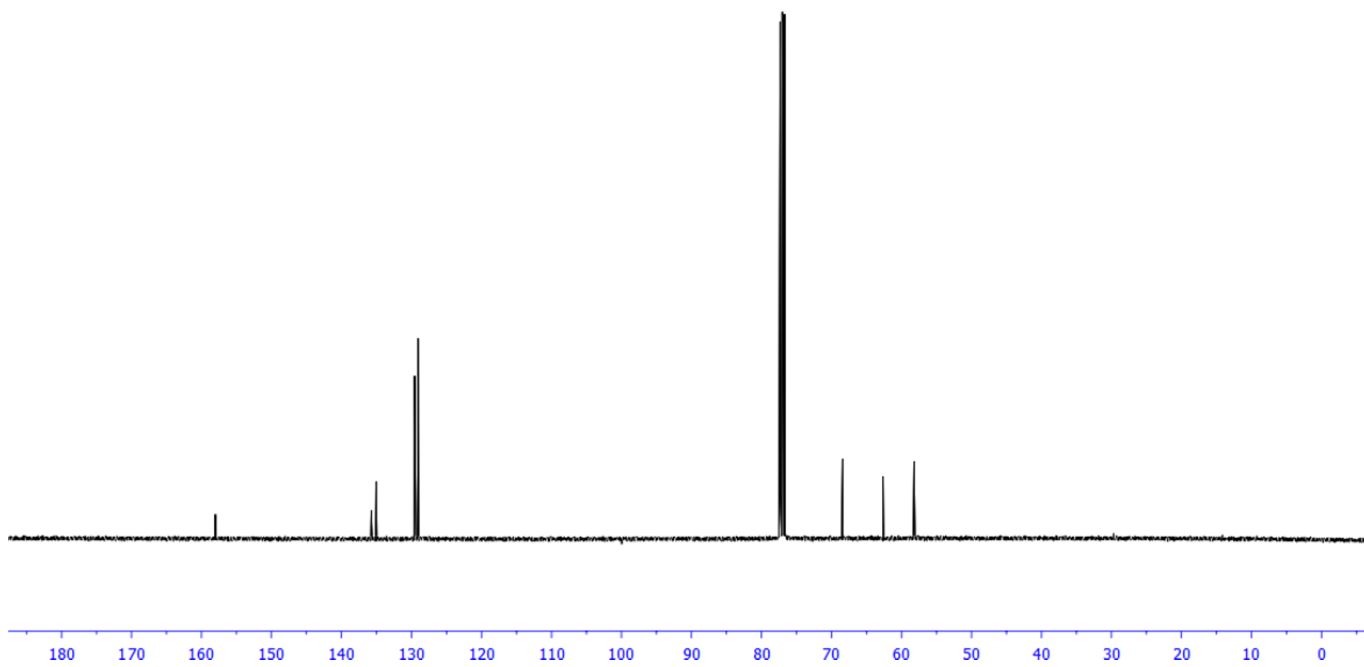

S101

7.57  
7.54  
7.28  
7.26

5.33  
4.71  
4.69  
4.61  
4.58  
4.56  
4.46  
4.45  
4.43  
4.42  
4.26  
4.24  
4.23  
4.22  
4.21  
4.20

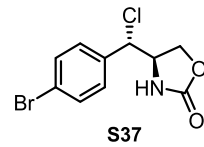

(CDCl<sub>3</sub>, 400 MHz)  
*dr* >20:1

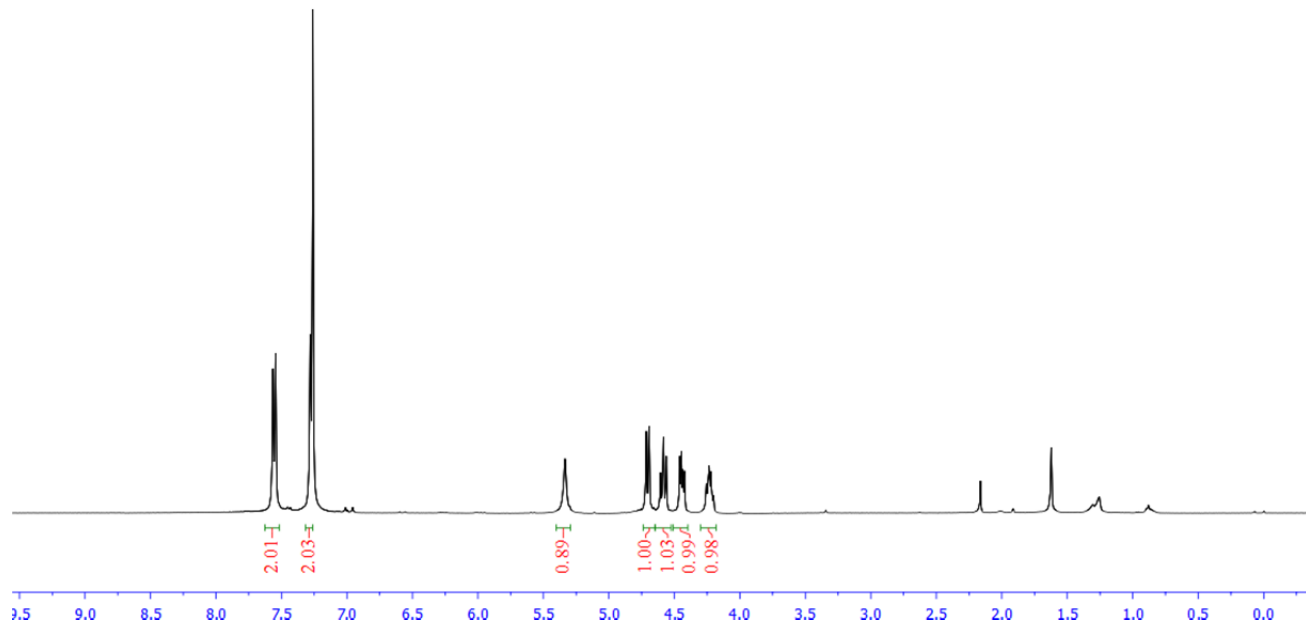

158.17

135.56  
132.48  
129.31  
123.84

68.33  
62.71  
58.15

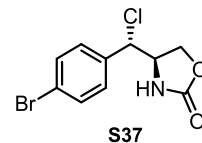

(CDCl<sub>3</sub>, 100 MHz)  
*dr* >20:1

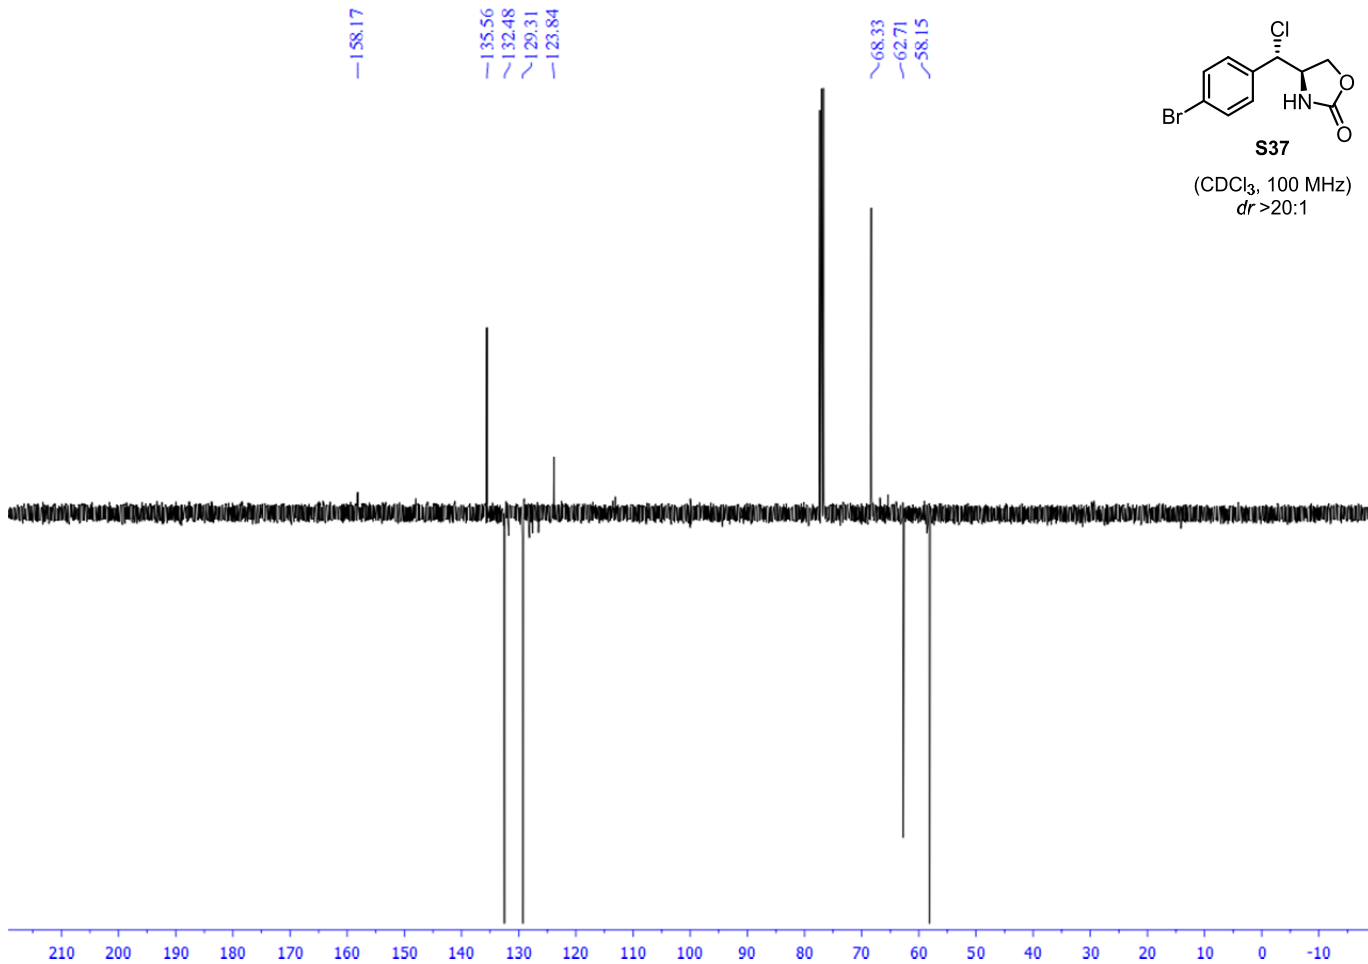

7.33  
7.31  
7.29  
7.21  
7.19  
7.17  
4.83  
4.68  
4.66  
4.65  
4.63  
4.62  
4.60  
4.50  
4.49  
4.48  
4.46  
4.29  
4.27  
4.26  
4.25  
4.24  
4.23

-2.38

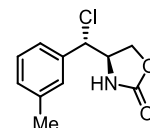

**S38**

(CDCl<sub>3</sub>, 400 MHz)  
dr :12:1

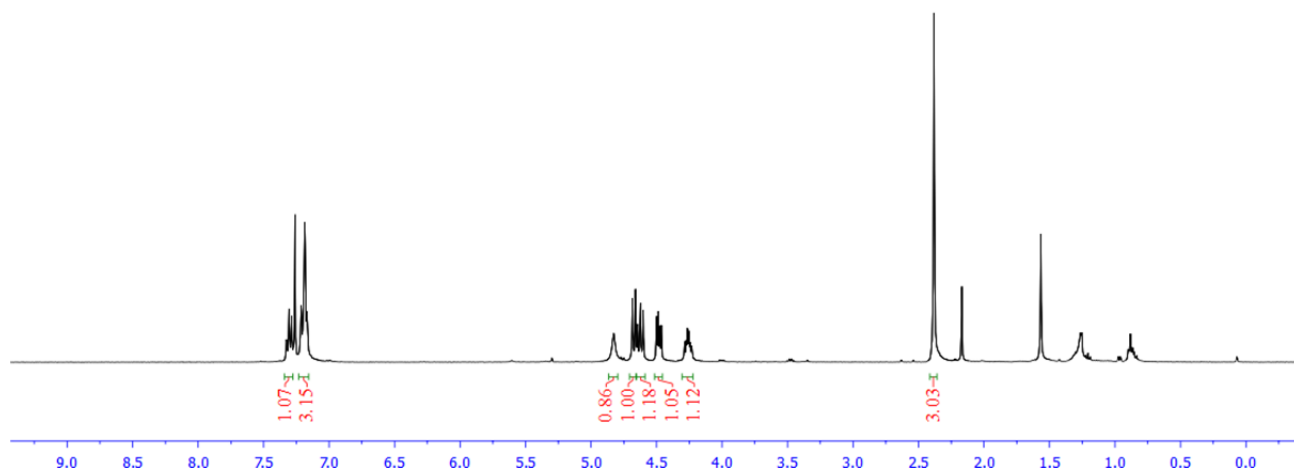

-158.31

139.19  
136.51  
130.40  
129.17  
128.30  
124.65

68.51  
63.55  
58.26

-21.40

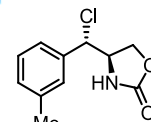

**S38**

(CDCl<sub>3</sub>, 100 MHz)  
dr :12:1

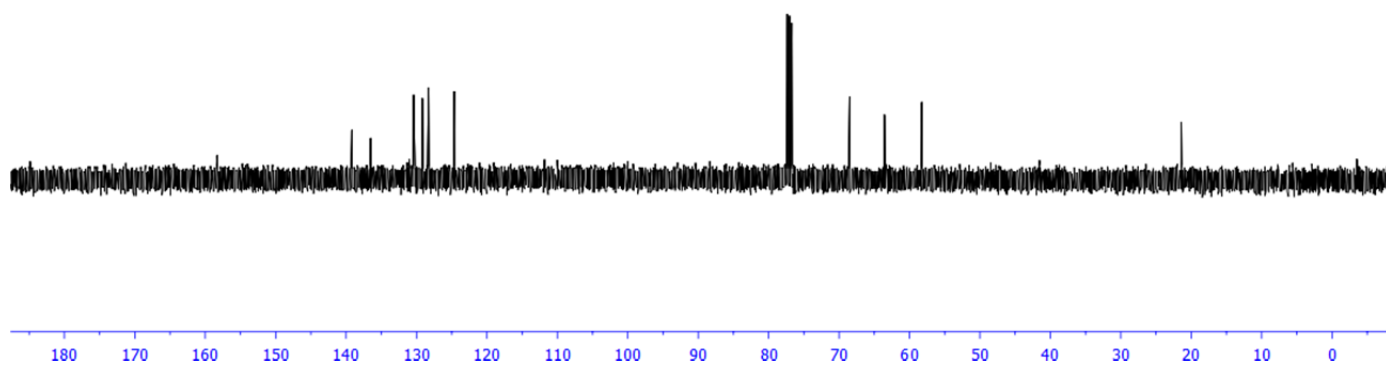

7.55  
7.55  
7.54  
7.53  
7.53  
7.34  
7.33  
7.32  
7.30  
7.28  
7.26

5.10  
4.68  
4.66  
4.64  
4.62  
4.61  
4.59  
4.48  
4.47  
4.46  
4.45  
4.26  
4.25  
4.24  
4.23  
4.22  
4.21

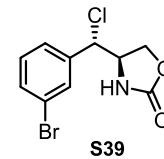

(CDCl<sub>3</sub>, 400 MHz)  
*dr* >20:1

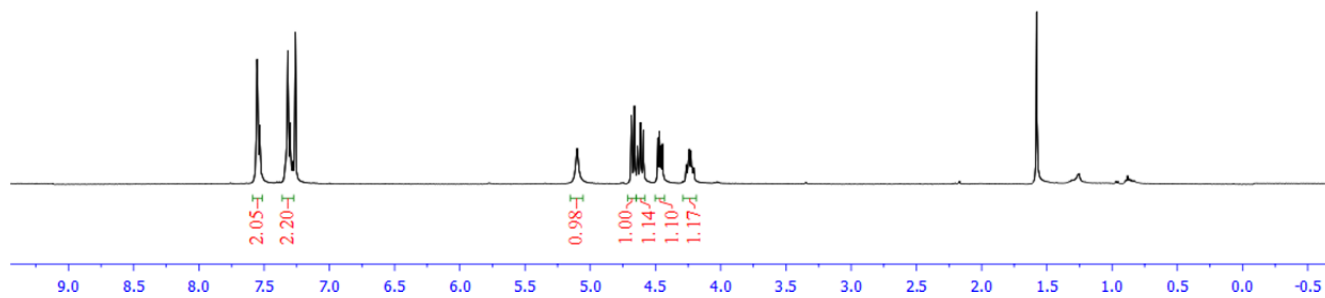

157.96

138.78  
132.87  
130.82  
130.74  
126.37  
123.34

77.34  
77.22  
77.02  
76.70  
68.43  
62.43  
58.22

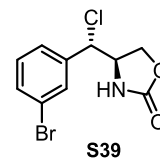

(CDCl<sub>3</sub>, 100 MHz)  
*dr* >20:1

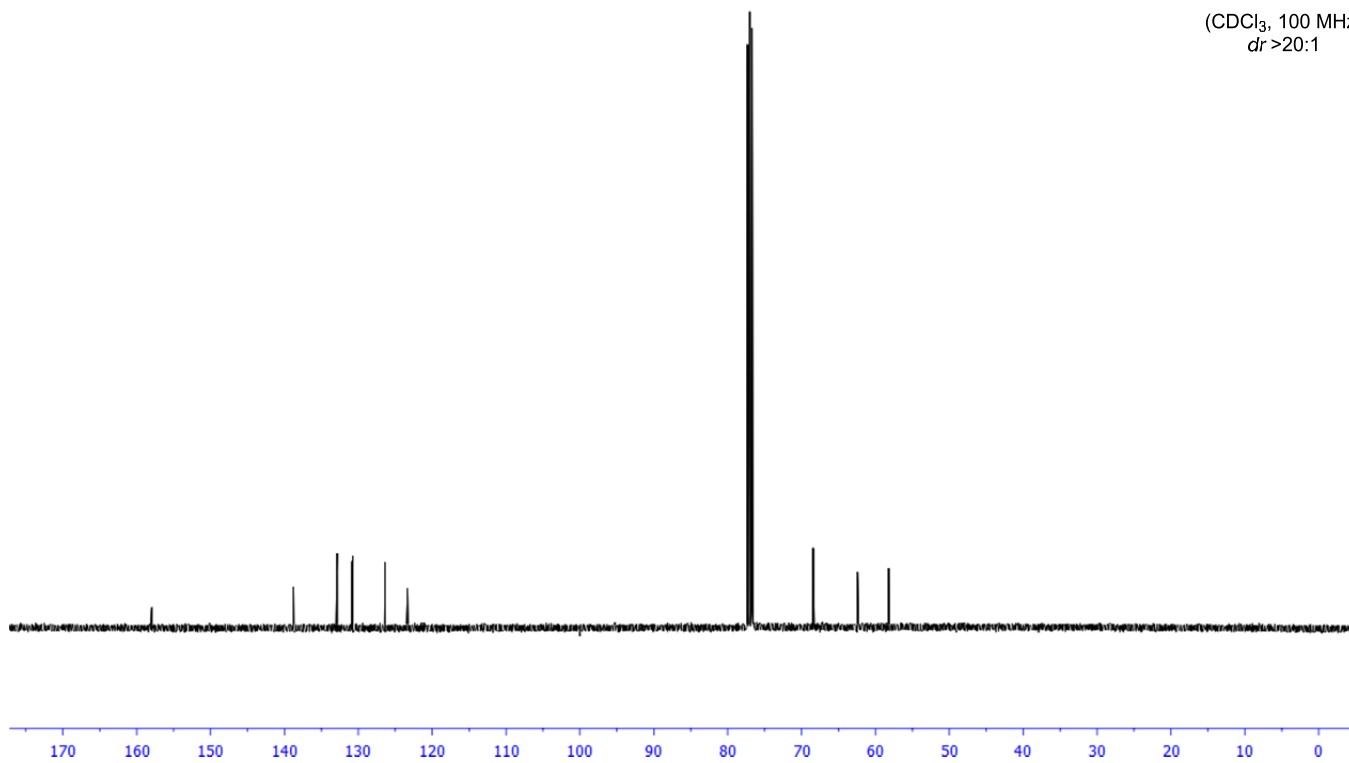

7.32  
7.30  
7.29  
7.28  
7.21  
7.18  
7.17

5.01  
4.69  
4.67  
4.63  
4.61  
4.61  
4.59  
4.29  
4.29  
4.28  
4.27  
4.26  
4.25  
4.24  
4.24  
4.23

—2.38

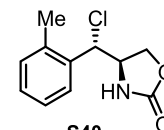

**S40**  
CDCl<sub>3</sub>, 400 MHz  
dr: 8:1

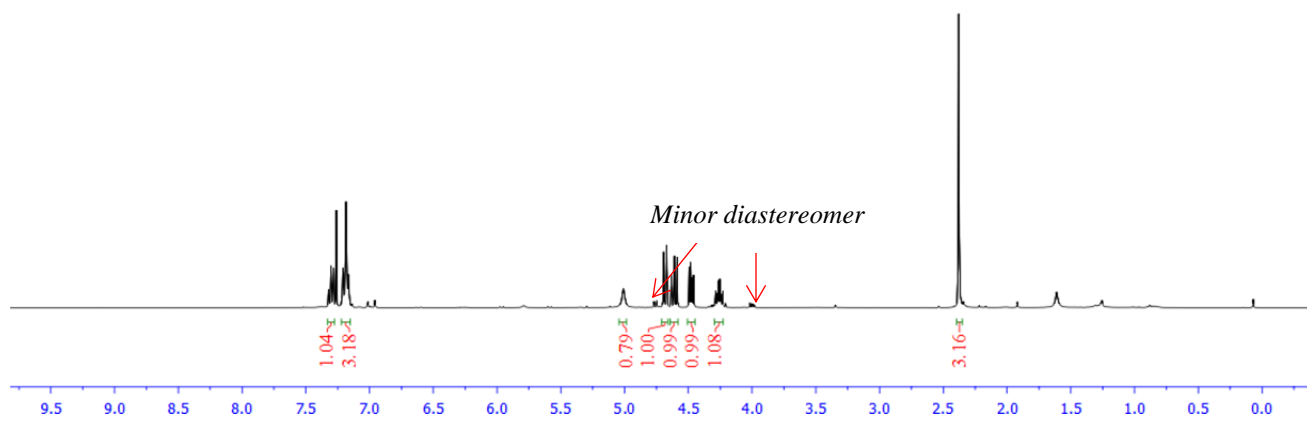

—158.42

136.69  
134.98  
131.25  
129.35  
127.22  
126.60

—68.79

—59.11  
—57.49

—19.42

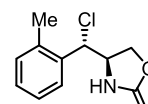

**S40**  
CDCl<sub>3</sub>, 100 MHz  
dr: 8:1

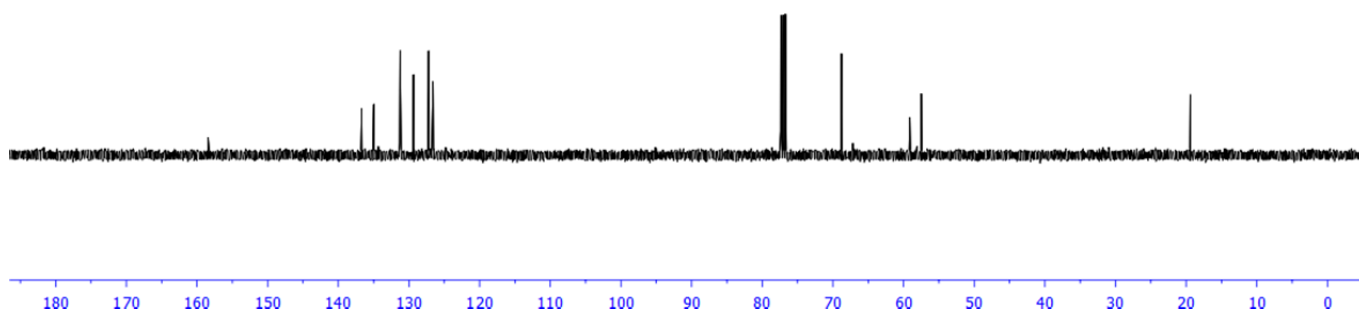

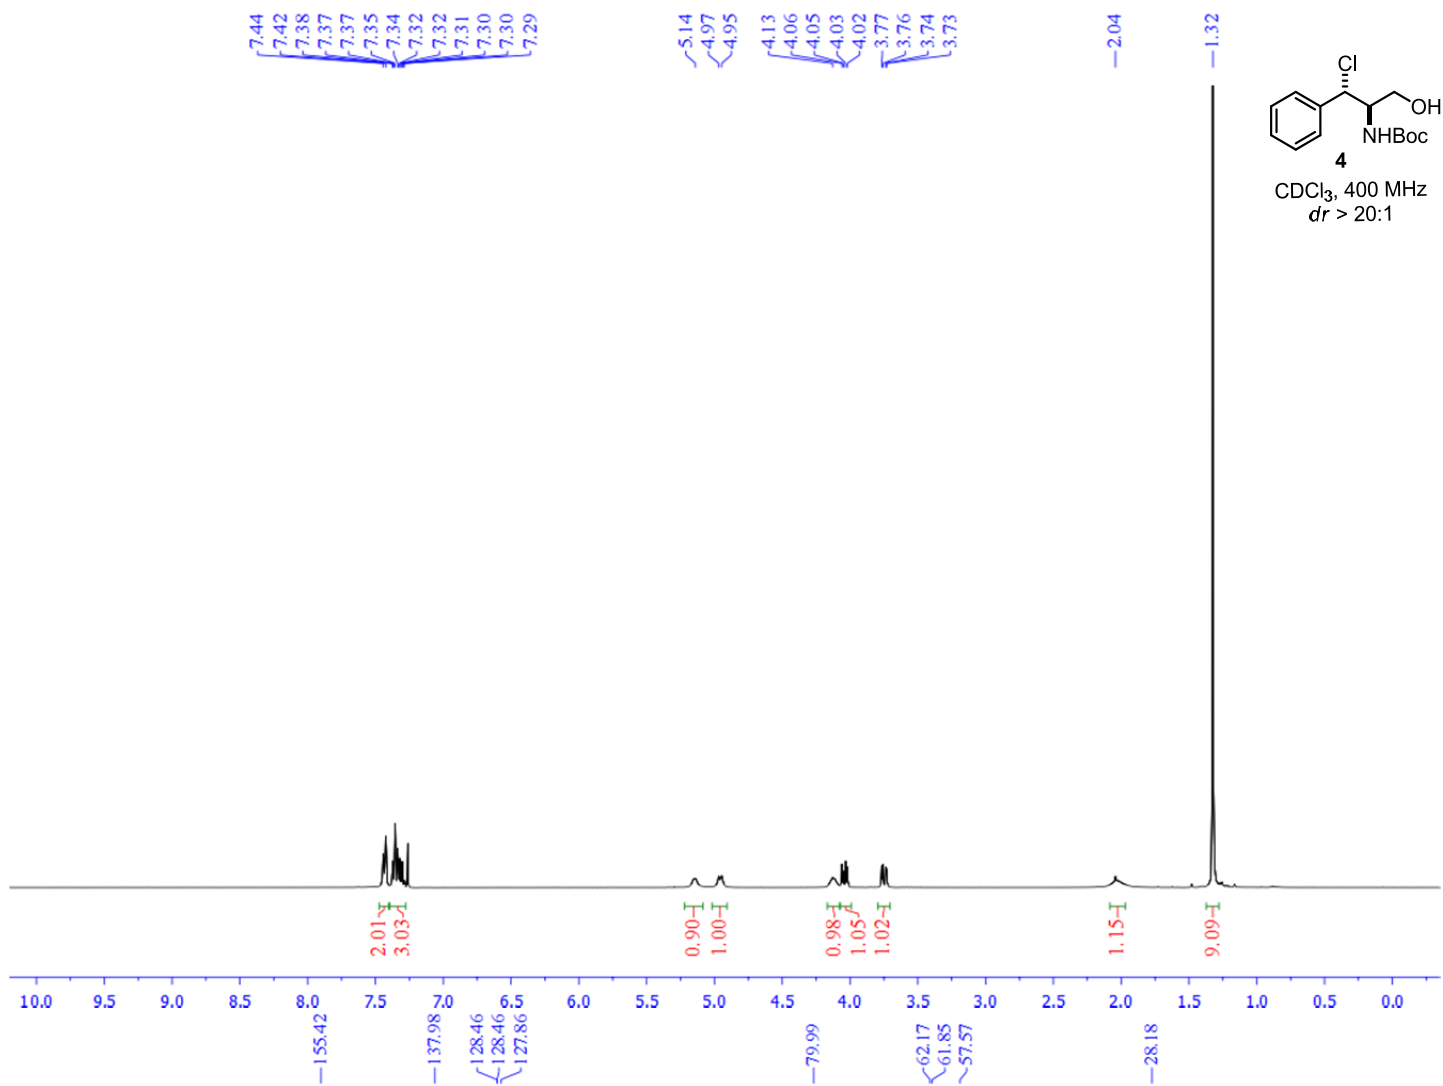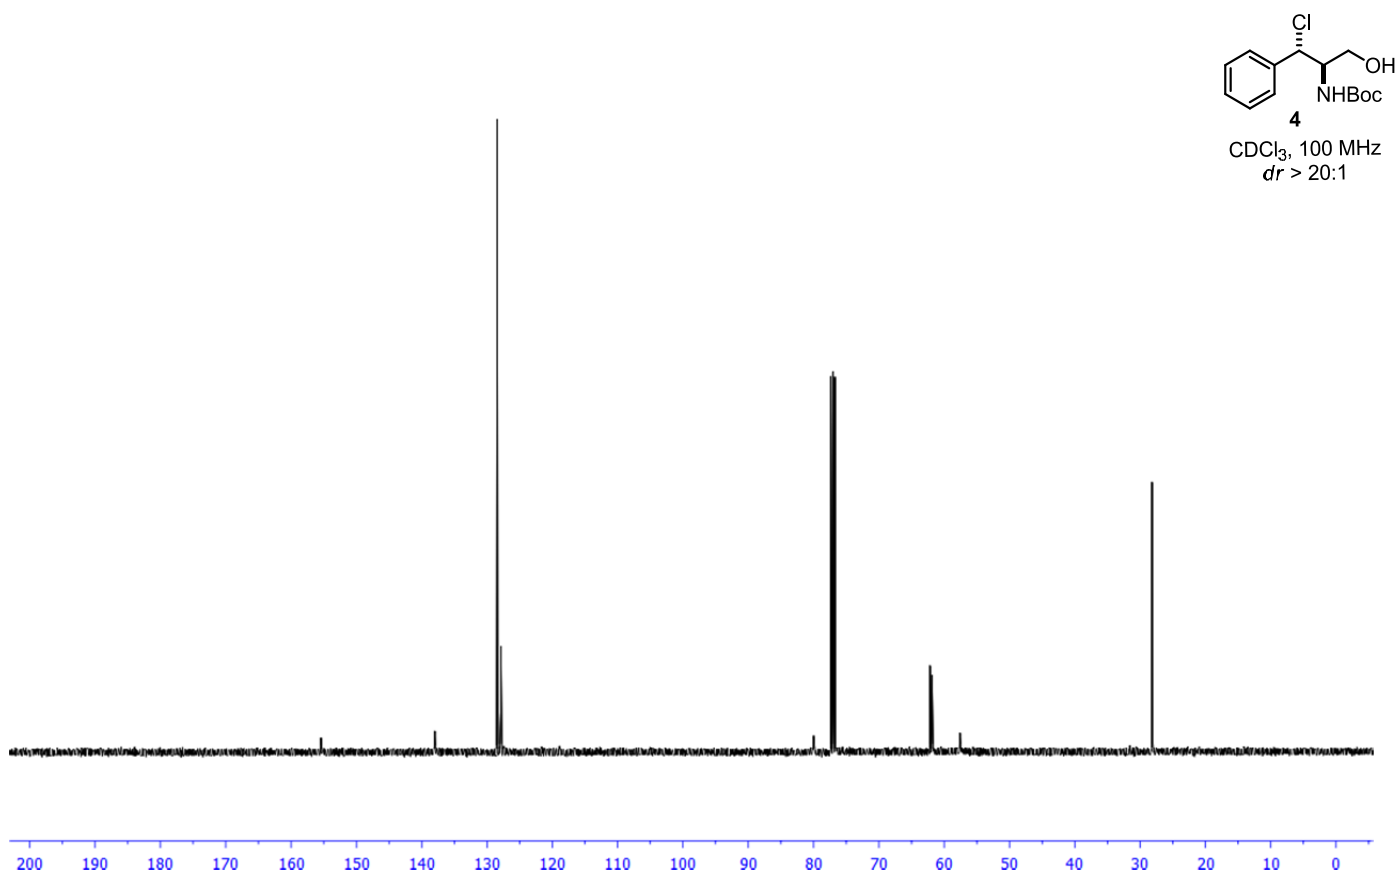

Supplement: c5sc00221d1.pdf [file c5sc00221d1.pdf]
